# Supplementary material for: Functional feeds marginally alter immune expression and microbiota of Atlantic salmon (Salmo salar) gut, gill, and skin mucosa though evidence of tissue-specific signatures and host–microbe coadaptation remain
Source: Anim Microbiome. 2022 Mar 10;4:20. doi: 10.1186/s42523-022-00173-0 (PMC8908560; doi:10.1186/s42523-022-00173-0)
Supplement: Supplementary file 2 — Additional file 2: Table S1. Top 50 keystone gut microbiota identified through network analysis; Table S2. Top 50 keystone gill microbiota identified through network analysis; Table S3. Top 50 keystone skin microbiota identified through network analysis; Table S4. Differentially abundant inferred metagenomic KEGG Orthologs (KO) across mucosal tissues; Table S5. Differentially abundant inferred metagenomic KEGG Enzyme Commission (EC) codes across mucosal tissues; Table S6. Differentially abundant inferred metagenomic MetaCyc pathways across mucosal tissues; Table S7. Primer sequences used for RT-qPCR. Primers with listed references were taken from previously published literature, after confirming specificity in-silico, and all other primers were designed using NCBI Primer-BLAST with the listed accession as the target. NCBI accessions are taken from RefSeq where possible, with those accessions denoted by * coming from GenBank. [file 42523_2022_173_MOESM2_ESM.xlsx]

## Sheet: S1. Gut Keystone Network Nodes
	LaplacianCentrality	Tissue	Phylum	Class	Order	Family	Genus	Species
ASV1717	384	Gut	Proteobacteria	Alphaproteobacteria	Sphingomonadales	Sphingomonadaceae	Sphingomonas	NA
ASV664	366	Gut	Bacteroidetes	Bacteroidia	Sphingobacteriales	Sphingobacteriaceae	Sphingobacterium	NA
ASV1727	346	Gut	Proteobacteria	Gammaproteobacteria	Pseudomonadales	Pseudomonadaceae	Pseudomonas	fluorescens
ASV209	258	Gut	Firmicutes	Bacilli	Lactobacillales	Aerococcaceae	Facklamia	NA
ASV47	250	Gut	Firmicutes	Bacilli	Lactobacillales	Aerococcaceae	Facklamia	tabacinasalis
ASV369	244	Gut	Proteobacteria	Alphaproteobacteria	Rhizobiales	Hyphomicrobiaceae	Filomicrobium	NA
ASV46	232	Gut	Actinobacteria	Actinobacteria	Corynebacteriales	Corynebacteriaceae	Corynebacterium_1	NA
ASV191	226	Gut	Actinobacteria	Actinobacteria	Corynebacteriales	Corynebacteriaceae	Corynebacterium_1	NA
ASV15	222	Gut	Bacteroidetes	Bacteroidia	Flavobacteriales	Flavobacteriaceae	NA	NA
ASV765	216	Gut	Bacteroidetes	Bacteroidia	Flavobacteriales	Flavobacteriaceae	Tenacibaculum	NA
ASV75	210	Gut	Bacteroidetes	Bacteroidia	Flavobacteriales	Flavobacteriaceae	Flavobacterium	NA
ASV96	210	Gut	Firmicutes	Bacilli	Bacillales	Bacillaceae	Geobacillus	NA
ASV429	204	Gut	Actinobacteria	Actinobacteria	Micrococcales	Cellulomonadaceae	Cellulomonas	aerilata
ASV290	202	Gut	Firmicutes	Bacilli	Lactobacillales	Carnobacteriaceae	Atopostipes	NA
ASV105	194	Gut	Proteobacteria	Alphaproteobacteria	Caulobacterales	Caulobacteraceae	Brevundimonas	NA
ASV298	190	Gut	Actinobacteria	Actinobacteria	Corynebacteriales	Corynebacteriaceae	Corynebacterium_1	NA
ASV301	190	Gut	Tenericutes	Mollicutes	Mycoplasmatales	Mycoplasmataceae	Mycoplasma	NA
ASV668	190	Gut	Proteobacteria	Gammaproteobacteria	Xanthomonadales	Xanthomonadaceae	Stenotrophomonas	NA
ASV459	188	Gut	Bacteroidetes	Bacteroidia	Bacteroidales	F082	NA	NA
ASV659	182	Gut	Proteobacteria	Gammaproteobacteria	Vibrionales	Vibrionaceae	Photobacterium	NA
ASV338	180	Gut	Firmicutes	Bacilli	Lactobacillales	Aerococcaceae	Aerococcus	viridans
ASV43	174	Gut	Proteobacteria	Gammaproteobacteria	Pseudomonadales	Moraxellaceae	Enhydrobacter	aerosaccus
ASV128	170	Gut	Firmicutes	Bacilli	Lactobacillales	Carnobacteriaceae	Atopostipes	NA
ASV231	164	Gut	Actinobacteria	Actinobacteria	Propionibacteriales	Propionibacteriaceae	Cutibacterium	NA
ASV9	162	Gut	Firmicutes	Bacilli	Bacillales	Bacillaceae	Geobacillus	stearothermophilus
ASV447	158	Gut	Bacteroidetes	Bacteroidia	Flavobacteriales	Flavobacteriaceae	NA	NA
ASV473	158	Gut	Actinobacteria	Actinobacteria	Micrococcales	Brevibacteriaceae	Brevibacterium	pityocampae
ASV636	158	Gut	Proteobacteria	Deltaproteobacteria	Bdellovibrionales	Bacteriovoracaceae	Peredibacter	NA
ASV127	156	Gut	Actinobacteria	Actinobacteria	Corynebacteriales	Corynebacteriaceae	Corynebacterium_1	efficiens
ASV185	156	Gut	Proteobacteria	Gammaproteobacteria	Vibrionales	Vibrionaceae	Photobacterium	phosphoreum
ASV27	154	Gut	Actinobacteria	Actinobacteria	Corynebacteriales	Corynebacteriaceae	Corynebacterium_1	maris
ASV117	154	Gut	Firmicutes	Bacilli	Lactobacillales	Carnobacteriaceae	Desemzia	NA
ASV157	154	Gut	Firmicutes	Bacilli	Bacillales	Staphylococcaceae	Jeotgalicoccus	NA
ASV467	152	Gut	Patescibacteria	Parcubacteria	Candidatus_Adlerbacteria	NA	NA	NA
ASV420	150	Gut	Firmicutes	Bacilli	Bacillales	Staphylococcaceae	Staphylococcus	NA
ASV58	148	Gut	Firmicutes	Bacilli	Lactobacillales	Streptococcaceae	Streptococcus	NA
ASV110	148	Gut	Firmicutes	Clostridia	Clostridiales	Peptostreptococcaceae	Romboutsia	NA
ASV371	148	Gut	Actinobacteria	Actinobacteria	Frankiales	Geodermatophilaceae	Blastococcus	endophyticus
ASV53	146	Gut	Firmicutes	Bacilli	Bacillales	Staphylococcaceae	Staphylococcus	NA
ASV104	146	Gut	Actinobacteria	Actinobacteria	Pseudonocardiales	Pseudonocardiaceae	Saccharopolyspora	NA
ASV123	144	Gut	Firmicutes	Clostridia	Clostridiales	Family_XI	Tepidimicrobium	NA
ASV803	144	Gut	Firmicutes	Bacilli	Lactobacillales	Carnobacteriaceae	Atopostipes	NA
ASV217	142	Gut	Firmicutes	Clostridia	Clostridiales	Peptostreptococcaceae	Paraclostridium	NA
ASV65	140	Gut	Firmicutes	Bacilli	Lactobacillales	Carnobacteriaceae	Atopostipes	NA
ASV277	140	Gut	Actinobacteria	Acidimicrobiia	NA	NA	NA	NA
ASV600	140	Gut	Actinobacteria	Actinobacteria	Corynebacteriales	Nocardiaceae	Rhodococcus	NA
ASV62	136	Gut	Actinobacteria	Actinobacteria	Micrococcales	Micrococcaceae	Micrococcus	NA
ASV761	136	Gut	Firmicutes	Bacilli	Bacillales	Family_XII	Exiguobacterium	NA
ASV994	136	Gut	Fusobacteria	Fusobacteriia	Fusobacteriales	Fusobacteriaceae	Fusobacterium	NA
ASV1318	134	Gut	Bacteroidetes	Bacteroidia	Flavobacteriales	Flavobacteriaceae	Tenacibaculum	NA

## Sheet: S2. Gill Keystone Network Nodes
	LaplacianCentrality	Tissue	Phylum	Class	Order	Family	Genus	Species
ASV3	6564	Gill	Proteobacteria	Gammaproteobacteria	Enterobacteriales	Enterobacteriaceae	Escherichia/Shigella	NA
ASV1354	5118	Gill	Proteobacteria	Alphaproteobacteria	Caulobacterales	Hyphomonadaceae	Hyphomonas	NA
ASV1330	5088	Gill	Actinobacteria	Actinobacteria	Micrococcales	Brevibacteriaceae	Brevibacterium	NA
ASV2263	4620	Gill	Proteobacteria	Alphaproteobacteria	Rhodobacterales	Rhodobacteraceae	NA	NA
ASV762	4314	Gill	Bacteroidetes	Bacteroidia	NA	NA	NA	NA
ASV1215	4236	Gill	Proteobacteria	Deltaproteobacteria	Myxococcales	Sandaracinaceae	NA	NA
ASV1770	4132	Gill	Proteobacteria	Gammaproteobacteria	Betaproteobacteriales	Burkholderiaceae	Pelomonas	NA
ASV759	3980	Gill	Actinobacteria	Actinobacteria	NA	NA	NA	NA
ASV1313	3970	Gill	Bacteroidetes	Bacteroidia	Flavobacteriales	NA	NA	NA
ASV1718	3766	Gill	Bacteroidetes	Bacteroidia	NA	NA	NA	NA
ASV1423	3734	Gill	Patescibacteria	Parcubacteria	Candidatus_Kaiserbacteria	NA	NA	NA
ASV80	3714	Gill	Actinobacteria	Actinobacteria	Corynebacteriales	Mycobacteriaceae	Mycobacterium	NA
ASV56	3704	Gill	Chloroflexi	Anaerolineae	Ardenticatenales	Ardenticatenaceae	NA	NA
ASV2090	3686	Gill	Bacteroidetes	Bacteroidia	Chitinophagales	Saprospiraceae	Lewinella	persica
ASV85	3662	Gill	Proteobacteria	Deltaproteobacteria	NB1-j	NA	NA	NA
ASV2255	3594	Gill	Gemmatimonadetes	PAUC43f_marine_benthic_group	NA	NA	NA	NA
ASV52	3556	Gill	Proteobacteria	Gammaproteobacteria	Alteromonadales	Marinobacteraceae	Marinobacter	NA
ASV88	3534	Gill	Bacteroidetes	Bacteroidia	Flavobacteriales	Flavobacteriaceae	Spongiimonas	NA
ASV54	3476	Gill	Proteobacteria	Gammaproteobacteria	Pseudomonadales	Moraxellaceae	Psychrobacter	NA
ASV1	3468	Gill	Proteobacteria	Gammaproteobacteria	Vibrionales	Vibrionaceae	Aliivibrio	finisterrensis
ASV76	3468	Gill	Bacteroidetes	Bacteroidia	Flavobacteriales	Flavobacteriaceae	Pseudofulvibacter	NA
ASV2048	3462	Gill	Proteobacteria	Deltaproteobacteria	PB19	NA	NA	NA
ASV48	3422	Gill	Bacteroidetes	Bacteroidia	Flavobacteriales	Flavobacteriaceae	Leeuwenhoekiella	aequorea
ASV1535	3416	Gill	Bacteroidetes	Bacteroidia	Chitinophagales	Saprospiraceae	NA	NA
ASV611	3414	Gill	Proteobacteria	Gammaproteobacteria	Thiotrichales	Thiotrichaceae	Cocleimonas	NA
ASV26	3410	Gill	Proteobacteria	Gammaproteobacteria	Salinisphaerales	Salinisphaeraceae	Salinisphaera	NA
ASV38	3384	Gill	Bacteroidetes	Bacteroidia	Flavobacteriales	Flavobacteriaceae	NA	NA
ASV406	3380	Gill	Proteobacteria	Gammaproteobacteria	Oceanospirillales	Saccharospirillaceae	Oleispira	NA
ASV1797	3374	Gill	Proteobacteria	Alphaproteobacteria	Caulobacterales	Hyphomonadaceae	NA	NA
ASV177	3348	Gill	Proteobacteria	Deltaproteobacteria	Myxococcales	Sandaracinaceae	NA	NA
ASV479	3332	Gill	Proteobacteria	Gammaproteobacteria	Francisellales	Francisellaceae	Francisella	NA
ASV433	3284	Gill	Proteobacteria	Gammaproteobacteria	Alteromonadales	Colwelliaceae	NA	NA
ASV1421	3272	Gill	Proteobacteria	Alphaproteobacteria	Rhodobacterales	Rhodobacteraceae	Sedimentitalea	NA
ASV1633	3230	Gill	Proteobacteria	Gammaproteobacteria	Alteromonadales	Marinobacteraceae	Marinobacter	NA
ASV1373	3228	Gill	Bacteroidetes	Bacteroidia	Flavobacteriales	Flavobacteriaceae	Spongiimonas	NA
ASV158	3226	Gill	Bacteroidetes	Bacteroidia	Flavobacteriales	Flavobacteriaceae	Tenacibaculum	NA
ASV304	3222	Gill	Bacteroidetes	Bacteroidia	Flavobacteriales	Flavobacteriaceae	NA	NA
ASV643	3166	Gill	Proteobacteria	Deltaproteobacteria	Bdellovibrionales	Bdellovibrionaceae	Bdellovibrio	NA
ASV666	3144	Gill	Bacteroidetes	Bacteroidia	Cytophagales	Spirosomaceae	Taeseokella	NA
ASV954	3138	Gill	Bacteroidetes	Bacteroidia	Chitinophagales	Saprospiraceae	NA	NA
ASV1091	3132	Gill	Patescibacteria	Gracilibacteria	Absconditabacteriales_(SR1)	NA	NA	NA
ASV42	3124	Gill	Bacteroidetes	Bacteroidia	Flavobacteriales	Weeksellaceae	Chryseobacterium	NA
ASV1946	3116	Gill	Proteobacteria	Gammaproteobacteria	Oceanospirillales	Saccharospirillaceae	Oleispira	NA
ASV18	3100	Gill	Proteobacteria	Gammaproteobacteria	Vibrionales	Vibrionaceae	Photobacterium	NA
ASV681	3086	Gill	Planctomycetes	OM190	NA	NA	NA	NA
ASV24	3078	Gill	Patescibacteria	Parcubacteria	Candidatus_Kaiserbacteria	NA	NA	NA
ASV17	3074	Gill	Proteobacteria	Gammaproteobacteria	Salinisphaerales	Salinisphaeraceae	Salinisphaera	japonica
ASV27	3062	Gill	Actinobacteria	Actinobacteria	Corynebacteriales	Corynebacteriaceae	Corynebacterium_1	maris
ASV101	3048	Gill	Proteobacteria	Alphaproteobacteria	Puniceispirillales	EF100-94H03	NA	NA
ASV207	3044	Gill	Actinobacteria	Actinobacteria	Corynebacteriales	Mycobacteriaceae	Mycobacterium	NA

## Sheet: S3. Skin Keystone Network Nodes
	LaplacianCentrality	Tissue	Phylum	Class	Order	Family	Genus	Species
ASV3	8438	Skin	Proteobacteria	Gammaproteobacteria	Enterobacteriales	Enterobacteriaceae	Escherichia/Shigella	NA
ASV2373	5794	Skin	Proteobacteria	Gammaproteobacteria	Alteromonadales	Shewanellaceae	Shewanella	NA
ASV94	4816	Skin	Proteobacteria	Gammaproteobacteria	Gammaproteobacteria_Incertae_Sedis	Unknown_Family	NA	NA
ASV91	4762	Skin	Proteobacteria	Gammaproteobacteria	Oceanospirillales	Halomonadaceae	Chromohalobacter	NA
ASV132	4236	Skin	Proteobacteria	Gammaproteobacteria	Oceanospirillales	Halomonadaceae	Halomonas	arcis
ASV811	4188	Skin	Bacteroidetes	Bacteroidia	Flavobacteriales	Flavobacteriaceae	Euzebyella	NA
ASV1332	4188	Skin	Bacteroidetes	Bacteroidia	Cytophagales	Cyclobacteriaceae	Reichenbachiella	NA
ASV507	4084	Skin	Acidobacteria	Thermoanaerobaculia	Thermoanaerobaculales	Thermoanaerobaculaceae	Subgroup_10	NA
ASV880	3808	Skin	Bacteroidetes	Rhodothermia	Balneolales	Balneolaceae	NA	NA
ASV2189	3770	Skin	Planctomycetes	Planctomycetacia	Pirellulales	Pirellulaceae	Pirellula	NA
ASV1590	3724	Skin	Proteobacteria	Deltaproteobacteria	Bdellovibrionales	Bacteriovoracaceae	NA	NA
ASV158	3406	Skin	Bacteroidetes	Bacteroidia	Flavobacteriales	Flavobacteriaceae	Tenacibaculum	NA
ASV490	3396	Skin	Proteobacteria	Alphaproteobacteria	Rhodobacterales	Rhodobacteraceae	Roseivivax	roseus
ASV95	3380	Skin	Nitrospirae	Nitrospira	Nitrospirales	Nitrospiraceae	Nitrospira	NA
ASV1787	3346	Skin	Proteobacteria	Gammaproteobacteria	Oceanospirillales	Saccharospirillaceae	Saccharospirillum	NA
ASV71	3340	Skin	Proteobacteria	Gammaproteobacteria	Salinisphaerales	Salinisphaeraceae	Salinisphaera	NA
ASV903	3294	Skin	Patescibacteria	Parcubacteria	Candidatus_Campbellbacteria	NA	NA	NA
ASV42	3280	Skin	Bacteroidetes	Bacteroidia	Flavobacteriales	Weeksellaceae	Chryseobacterium	NA
ASV1646	3268	Skin	Bacteroidetes	Bacteroidia	Flavobacteriales	Flavobacteriaceae	Salegentibacter	salinarum
ASV2204	3224	Skin	Patescibacteria	Parcubacteria	Candidatus_Kaiserbacteria	NA	NA	NA
ASV52	3214	Skin	Proteobacteria	Gammaproteobacteria	Alteromonadales	Marinobacteraceae	Marinobacter	NA
ASV2350	3104	Skin	Planctomycetes	Planctomycetacia	Pirellulales	Pirellulaceae	Blastopirellula	NA
ASV685	3100	Skin	Bacteroidetes	Bacteroidia	Flavobacteriales	Flavobacteriaceae	NA	NA
ASV1041	3084	Skin	Proteobacteria	Gammaproteobacteria	Alteromonadales	Alteromonadaceae	Alteromonas	NA
ASV985	3080	Skin	Proteobacteria	Deltaproteobacteria	NB1-j	NA	NA	NA
ASV1685	3072	Skin	Bacteroidetes	Rhodothermia	Balneolales	Balneolaceae	NA	NA
ASV23	3024	Skin	Actinobacteria	Acidimicrobiia	Microtrichales	Microtrichaceae	Candidatus_Microthrix	NA
ASV227	3022	Skin	Proteobacteria	Gammaproteobacteria	Oceanospirillales	Halomonadaceae	Halomonas	NA
ASV108	3020	Skin	Planctomycetes	Planctomycetacia	Pirellulales	Pirellulaceae	Bythopirellula	NA
ASV1581	3018	Skin	Acidobacteria	Holophagae	Acanthopleuribacterales	Acanthopleuribacteraceae	Acanthopleuribacter	NA
ASV187	3014	Skin	Proteobacteria	Gammaproteobacteria	Salinisphaerales	Salinisphaeraceae	Salinisphaera	NA
ASV933	2996	Skin	Epsilonbacteraeota	Campylobacteria	Campylobacterales	Thiovulaceae	Thiovulum	NA
ASV59	2978	Skin	Proteobacteria	Gammaproteobacteria	Oceanospirillales	Halomonadaceae	Chromohalobacter	canadensis
ASV916	2972	Skin	Patescibacteria	Parcubacteria	Candidatus_Kaiserbacteria	NA	NA	NA
ASV381	2960	Skin	Proteobacteria	Gammaproteobacteria	Alteromonadales	Marinobacteraceae	Marinobacter	subterrani
ASV904	2948	Skin	Bacteroidetes	Bacteroidia	Flavobacteriales	Crocinitomicaceae	Brumimicrobium	NA
ASV2143	2912	Skin	Proteobacteria	Gammaproteobacteria	Alteromonadales	Marinobacteraceae	Marinobacter	NA
ASV934	2900	Skin	Bacteroidetes	Bacteroidia	Flavobacteriales	NA	NA	NA
ASV40	2866	Skin	Bacteroidetes	Bacteroidia	Flavobacteriales	Flavobacteriaceae	Algibacter	NA
ASV1040	2864	Skin	Proteobacteria	Alphaproteobacteria	Rhodobacterales	Rhodobacteraceae	Roseovarius	NA
ASV332	2862	Skin	Bacteroidetes	Bacteroidia	Flavobacteriales	Flavobacteriaceae	Croceibacter	atlanticus
ASV444	2854	Skin	Proteobacteria	Gammaproteobacteria	NA	NA	NA	NA
ASV87	2844	Skin	Proteobacteria	Gammaproteobacteria	Oceanospirillales	Halomonadaceae	Halomonas	NA
ASV2344	2834	Skin	Nitrospinae	Nitrospinia	Nitrospinales	Nitrospinaceae	Nitrospina	NA
ASV375	2788	Skin	Bacteroidetes	Bacteroidia	NA	NA	NA	NA
ASV680	2788	Skin	Firmicutes	Bacilli	Bacillales	Family_XII	Exiguobacterium	oxidotolerans
ASV226	2772	Skin	Bacteroidetes	Bacteroidia	Chitinophagales	Saprospiraceae	NA	NA
ASV21	2762	Skin	Proteobacteria	Gammaproteobacteria	Francisellales	Francisellaceae	Francisella	NA
ASV221	2752	Skin	Proteobacteria	Deltaproteobacteria	Bradymonadales	NA	NA	NA
ASV1900	2730	Skin	Proteobacteria	Alphaproteobacteria	Rhodobacterales	Rhodobacteraceae	Roseovarius	NA

## Sheet: S4. KEGG KO
KEEG function	p-values	p-values (corrected)	Effect size	Gill: mean rel. freq. (%)	Gill: std. dev. (%)	Gut: mean rel. freq. (%)	Gut: std. dev. (%)	Skin: mean rel. freq. (%)	Skin: std. dev. (%)
K00003	4.30366e-23	2.96264e-19	0.558062	0.0374298	0.00650262	0.0118987	0.0109217	0.0324335	0.0110882
K00012	3.61938e-27	2.49158e-23	0.608507	0.0659685	0.0064938	0.044768	0.00504432	0.0624471	0.00968385
K00013	3.27539e-29	2.25478e-25	0.66693	0.0623963	0.00526363	0.0437644	0.0029043	0.0561547	0.00713494
K00014	1.34091e-26	9.23083e-23	0.598784	0.0668583	0.00512395	0.047646	0.00558696	0.0601089	0.00814954
K00024	1.17746e-28	8.10566e-25	0.594415	0.0593432	0.00640155	0.041868	0.00340703	0.0525408	0.00710254
K00027	7.57301e-27	5.21326e-23	0.548357	0.0282251	0.00588036	0.0457267	0.00836422	0.0315011	0.00604959
K00031	1.0594e-30	7.29292e-27	0.704121	0.0670214	0.00698817	0.0435107	0.00302533	0.060307	0.00786155
K00050	7.04856e-28	4.85223e-24	0.596336	0.011497	0.00358599	0.00110502	0.00164586	0.0103188	0.00518826
K00052	3.79735e-28	2.6141e-24	0.622256	0.0672835	0.00791864	0.0450702	0.0040261	0.0585993	0.00832242
K00053	2.56918e-26	1.76862e-22	0.600331	0.061095	0.00536059	0.0445573	0.0031685	0.0558508	0.00730916
K00057	1.1201e-27	7.71075e-24	0.627302	0.0654222	0.00568495	0.0460489	0.00433745	0.0586924	0.00778296
K00058	1.55508e-31	1.07052e-27	0.620331	0.0970438	0.0105503	0.057027	0.0118709	0.0848742	0.0158171
K00059	1.21577e-24	8.36935e-21	0.561898	0.205114	0.0269693	0.115262	0.0306715	0.175605	0.0390515
K00060	4.64153e-22	3.19523e-18	0.548182	0.0198166	0.00352077	0.0343328	0.00758638	0.022288	0.00533708
K00067	5.43078e-30	3.73855e-26	0.708383	0.052281	0.0116812	0.00742607	0.00784178	0.0434455	0.0159309
K00074	2.28268e-25	1.5714e-21	0.539434	0.0416554	0.00762365	0.0131762	0.0135551	0.0315317	0.0104484
K00075	8.6627e-25	5.9634e-21	0.557996	0.0591375	0.00434868	0.045536	0.00380424	0.054927	0.00642393
K00091	1.81979e-26	1.25274e-22	0.510563	0.00678919	0.00301228	0.000665315	0.00148216	0.0045793	0.00260047
K00097	4.20147e-25	2.89229e-21	0.571608	0.0571955	0.0052058	0.0457603	0.00557118	0.0597212	0.0049373
K00112	1.15976e-27	7.98381e-24	0.664646	0.0116505	0.00405512	0.0328399	0.00852458	0.0143494	0.00660202
K00113	2.30998e-27	1.59019e-23	0.653216	0.0122476	0.00400729	0.0328855	0.00853626	0.0150558	0.00652585
K00128	1.28574e-22	8.85102e-19	0.504986	0.0908921	0.0143204	0.0475264	0.0146628	0.0739518	0.0221538
K00134	1.66945e-26	1.14925e-22	0.542556	0.117162	0.0104927	0.0859996	0.0066845	0.106944	0.0160307
K00135	2.32198e-23	1.59845e-19	0.542582	0.0638063	0.00839202	0.026538	0.0190481	0.0610926	0.0168668
K00145	6.33807e-29	4.36313e-25	0.663508	0.0622767	0.00532352	0.0434078	0.00346234	0.0565684	0.00720086
K00147	1.15828e-25	7.97363e-22	0.521621	0.0581174	0.00451782	0.0441251	0.00373237	0.0524159	0.00732265
K00184	9.74649e-34	6.70948e-30	0.625761	0.0273988	0.0102457	0.00169224	0.00290773	0.0149988	0.00891373
K00185	7.63532e-34	5.25615e-30	0.622229	0.0275946	0.0103875	0.0016478	0.00290503	0.014925	0.00911407
K00208	4.85813e-28	3.34433e-24	0.677938	0.0473037	0.00727931	0.016362	0.0128465	0.0471271	0.00902606
K00215	2.0613e-28	1.419e-24	0.641773	0.0673091	0.00670363	0.0457523	0.00360827	0.0595941	0.00844273
K00230	2.05928e-27	1.41761e-23	0.560075	0.0133085	0.00375696	0.0332919	0.00822793	0.0178095	0.00931935
K00239	4.00736e-29	2.75867e-25	0.662122	0.0648381	0.00621987	0.0436438	0.00338338	0.0579041	0.00809007
K00240	9.68427e-30	6.66665e-26	0.661502	0.0649854	0.00661276	0.0436551	0.00340285	0.0573125	0.00779434
K00241	1.87242e-29	1.28897e-25	0.65094	0.0624401	0.00609248	0.0429268	0.00297814	0.0556921	0.00749718
K00244	1.28184e-26	8.82421e-23	0.607162	0.0157945	0.00477452	0.0348332	0.00705549	0.0186159	0.00783135
K00245	3.8489e-26	2.64958e-22	0.627814	0.0130199	0.00398117	0.0328198	0.00856134	0.0162661	0.00655511
K00246	8.73912e-26	6.01601e-22	0.587744	0.0130061	0.0039846	0.0328198	0.00856135	0.0166128	0.00802345
K00247	3.09454e-27	2.13028e-23	0.658329	0.0120357	0.00398725	0.0327773	0.00855108	0.0149489	0.00636012
K00248	2.25727e-26	1.55391e-22	0.551723	0.0119848	0.00368247	0.00214618	0.00246946	0.00969146	0.00471476
K00252	4.13869e-26	2.84907e-22	0.543198	0.0325144	0.0093617	0.00765087	0.00862023	0.0239361	0.010046
K00253	4.77073e-28	3.28417e-24	0.574052	0.0112693	0.00364967	0.00147305	0.00215724	0.0125054	0.00589918
K00257	6.36256e-26	4.37999e-22	0.572769	0.0710219	0.0178035	0.0189827	0.0163168	0.0634485	0.0238451
K00261	2.83208e-30	1.9496e-26	0.64538	0.0185895	0.0056074	0.00229736	0.00276854	0.0122827	0.00575719
K00284	3.86553e-31	2.66103e-27	0.616978	0.0143504	0.00569085	0.00157991	0.00230741	0.00702923	0.00353368
K00285	1.77963e-26	1.2251e-22	0.5861	0.0328686	0.00543028	0.0143099	0.011314	0.0408928	0.010201
K00286	1.33891e-29	9.21708e-26	0.671285	0.0684047	0.00635635	0.0461327	0.0044397	0.0607354	0.00786664
K00290	1.37348e-27	9.45501e-24	0.546072	0.0110733	0.00437089	0.00144461	0.00311645	0.00677919	0.00305043
K00297	5.07403e-26	3.49296e-22	0.583111	0.0608873	0.00691945	0.0394273	0.00664387	0.0573704	0.00963847
K00330	1.9963e-25	1.37425e-21	0.628396	0.0415474	0.00751139	0.0146003	0.0118614	0.042453	0.00981655
K00331	7.70739e-25	5.30576e-21	0.62617	0.0405286	0.00737439	0.014484	0.0118158	0.0398609	0.00821425
K00332	9.70851e-27	6.68334e-23	0.625473	0.0311688	0.00821069	0.00640746	0.00676768	0.0267726	0.00955144
K00333	6.48275e-27	4.46273e-23	0.631647	0.0312201	0.00822095	0.0063239	0.00670476	0.0268545	0.0094405
K00334	1.08792e-25	7.48923e-22	0.633865	0.0361648	0.00632737	0.0128887	0.0104654	0.0377642	0.00851751
K00335	2.42071e-27	1.66641e-23	0.67879	0.0414063	0.00721989	0.0131959	0.0105762	0.0410764	0.00902895
K00336	2.92888e-25	2.01624e-21	0.624625	0.0357546	0.00606545	0.0130701	0.0105602	0.0369789	0.00824083
K00337	1.13289e-25	7.79879e-22	0.630665	0.0414142	0.00744235	0.014532	0.0117247	0.042301	0.0098043
K00338	9.32362e-25	6.41838e-21	0.622277	0.040163	0.00720001	0.0145301	0.0118004	0.0398293	0.00834214
K00339	7.50596e-25	5.1671e-21	0.622319	0.0398951	0.00725202	0.0144586	0.0117642	0.0398524	0.00828603
K00340	5.51057e-25	3.79348e-21	0.628046	0.0391312	0.00669801	0.0143493	0.0116092	0.0396985	0.0081862
K00341	3.53331e-25	2.43233e-21	0.626714	0.0407409	0.00742849	0.0143858	0.0116921	0.0400326	0.00863547
K00342	7.55915e-27	5.20372e-23	0.662862	0.0455102	0.00837571	0.0145298	0.0117875	0.044385	0.0100728
K00343	1.60456e-25	1.10458e-21	0.63199	0.0410738	0.00725598	0.0144989	0.0117519	0.0422092	0.00964669
K00356	1.71227e-26	1.17872e-22	0.557077	0.00803943	0.00248936	0.00138376	0.00224653	0.00991602	0.00447586
K00364	6.18498e-28	4.25774e-24	0.673611	0.0185773	0.00444873	0.0362063	0.0064738	0.0172051	0.00675456
K00382	2.21755e-25	1.52656e-21	0.551618	0.118746	0.0084105	0.0900667	0.0107962	0.108522	0.0121947
K00384	1.35794e-24	9.34806e-21	0.506081	0.104721	0.0132386	0.0616073	0.0201575	0.086507	0.0178247
K00390	2.98503e-25	2.0549e-21	0.511888	0.0533035	0.00564472	0.0403022	0.00387406	0.0476108	0.00568513
K00425	2.01379e-20	1.38629e-16	0.501517	0.0618216	0.00463151	0.077141	0.00852015	0.0653137	0.00573189
K00432	7.28403e-23	5.01433e-19	0.566599	0.0438999	0.0060277	0.0180786	0.0146362	0.0412398	0.00756132
K00451	9.80618e-28	6.75058e-24	0.532995	0.0173414	0.0047947	0.00276521	0.00368467	0.0144101	0.00802086
K00457	1.16045e-28	7.98856e-25	0.603647	0.0224276	0.0054626	0.00367628	0.00443719	0.0184036	0.00863936
K00459	4.61355e-22	3.17597e-18	0.512532	0.0279921	0.00596228	0.00887119	0.00873878	0.0285905	0.0110758
K00508	2.90701e-28	2.00119e-24	0.508784	0.0156317	0.00454262	0.00236889	0.00297342	0.0117879	0.00757658
K00523	1.46309e-28	1.00719e-24	0.503034	0.00642642	0.0026424	0.000618666	0.0011402	0.00895108	0.00518332
K00527	1.17248e-28	8.07135e-25	0.699235	0.0175334	0.00558553	0.0378742	0.00546737	0.0196827	0.00665804
K00537	1.15647e-24	7.96114e-21	0.527763	0.070259	0.0073718	0.0516992	0.00744416	0.06905	0.00893118
K00548	4.80707e-28	3.30919e-24	0.631353	0.0748035	0.0115347	0.0417431	0.00489604	0.0686884	0.0139279
K00554	7.27325e-28	5.00691e-24	0.634526	0.0638225	0.00501926	0.0458416	0.00390963	0.0573938	0.00723551
K00557	4.24106e-26	2.91955e-22	0.605134	0.0171399	0.00457355	0.0346563	0.00752093	0.0213008	0.00552786
K00563	9.04981e-27	6.22989e-23	0.627498	0.0200318	0.00537456	0.0373636	0.00570086	0.0217338	0.00670633
K00564	7.44891e-24	5.12783e-20	0.581448	0.0326858	0.00721486	0.0645139	0.0173693	0.0379868	0.00800278
K00566	8.09011e-28	5.56923e-24	0.637005	0.0649984	0.00528867	0.0460198	0.00418981	0.0587047	0.00760912
K00573	3.09756e-25	2.13236e-21	0.553021	0.0578681	0.00861474	0.0377472	0.00614083	0.0592682	0.0108449
K00600	4.69976e-28	3.23532e-24	0.656665	0.0686795	0.00533877	0.0468479	0.00476275	0.0630969	0.00890266
K00602	7.57126e-28	5.21206e-24	0.636441	0.0640857	0.00507065	0.0457954	0.00395518	0.0577038	0.00736261
K00604	9.15205e-30	6.30027e-26	0.660214	0.0703527	0.00697294	0.0464835	0.00478403	0.0606563	0.00853383
K00605	9.77426e-28	6.7286e-24	0.657465	0.0669118	0.00657553	0.0437319	0.00377893	0.0611854	0.00946776
K00606	7.28799e-28	5.01705e-24	0.642708	0.0615072	0.00585375	0.0424723	0.00366493	0.0563098	0.00754124
K00609	9.30252e-28	6.40385e-24	0.637231	0.0641874	0.0050785	0.045844	0.00384449	0.0578613	0.00743784
K00610	5.86745e-28	4.03915e-24	0.670458	0.0124927	0.00416751	0.0332044	0.00821857	0.0150048	0.00626897
K00616	8.22324e-26	5.66088e-22	0.603378	0.0675972	0.00426093	0.0522827	0.00713756	0.0648112	0.00422023
K00620	2.18216e-26	1.5022e-22	0.622651	0.0354637	0.00639785	0.00949683	0.00865319	0.031077	0.010637
K00626	2.76462e-23	1.90316e-19	0.552425	0.138252	0.0217781	0.0567662	0.0407823	0.130096	0.0329747
K00627	1.76393e-25	1.21429e-21	0.552603	0.0742437	0.00752167	0.0507383	0.00948467	0.0642667	0.00866668
K00641	1.35517e-26	9.32902e-23	0.61118	0.0317728	0.00617472	0.00785252	0.00781391	0.0274182	0.010125
K00645	3.86752e-28	2.6624e-24	0.654101	0.0633465	0.0052003	0.0451235	0.00354804	0.0580672	0.00711628
K00651	8.5022e-27	5.85291e-23	0.638518	0.0207342	0.00400504	0.0371955	0.00608575	0.0216761	0.00648158
K00655	1.06537e-28	7.33402e-25	0.646018	0.0921416	0.0105232	0.0526557	0.00998168	0.0835041	0.0157895
K00656	5.25955e-27	3.62068e-23	0.650905	0.0361903	0.0139511	0.0875518	0.00901004	0.0467884	0.022086
K00658	3.88233e-31	2.67259e-27	0.626362	0.0771282	0.00799303	0.0516634	0.00713742	0.0703734	0.0093914
K00661	4.66384e-23	3.21059e-19	0.555327	0.03376	0.0106917	0.0840269	0.0321578	0.0335519	0.0144364
K00677	1.14193e-25	7.86102e-22	0.522761	0.0559457	0.0085998	0.0367882	0.00684131	0.0508809	0.00749103
K00681	1.7362e-26	1.1952e-22	0.577989	0.062133	0.00722632	0.043028	0.00431263	0.0650492	0.0115211
K00694	2.11928e-22	1.45891e-18	0.540792	0.0122991	0.00394033	0.0300097	0.0100836	0.0150943	0.00598259
K00721	1.79762e-29	1.23748e-25	0.612746	0.0414869	0.0112507	0.00919109	0.00904116	0.0243732	0.0107488
K00758	1.08874e-25	7.49491e-22	0.62473	0.0213672	0.00443246	0.0363265	0.00620117	0.0238749	0.00427969
K00762	6.60931e-28	4.54985e-24	0.628492	0.0637281	0.00516344	0.0457842	0.00401739	0.0573284	0.00722319
K00764	1.05659e-27	7.27354e-24	0.63317	0.0642839	0.00517489	0.04581	0.003983	0.0580047	0.00752177
K00765	5.7325e-29	3.94626e-25	0.673939	0.0625528	0.00531298	0.0435139	0.00294827	0.0567844	0.00724271
K00767	1.92035e-27	1.32197e-23	0.62991	0.0596866	0.00587554	0.0411209	0.00418917	0.0547144	0.00732154
K00769	6.78666e-22	4.67194e-18	0.53758	0.0179419	0.00385075	0.033295	0.00837784	0.0215292	0.00501207
K00772	3.20216e-29	2.20436e-25	0.60625	0.0143871	0.00497319	0.00171583	0.00265375	0.0084906	0.00439503
K00773	3.54549e-28	2.44071e-24	0.641367	0.0632391	0.00538371	0.0447085	0.00383388	0.0570703	0.00728265
K00789	1.59348e-27	1.09695e-23	0.62169	0.0643848	0.0050744	0.0462896	0.00442667	0.0578794	0.00735121
K00791	5.80559e-28	3.99657e-24	0.635393	0.0644446	0.00516482	0.0459346	0.00406069	0.0577695	0.00739973
K00794	3.18953e-27	2.19567e-23	0.619394	0.0659815	0.00651067	0.045778	0.00480025	0.0594066	0.00785653
K00796	4.30486e-26	2.96347e-22	0.57048	0.0675074	0.00642542	0.0476824	0.0064388	0.0587685	0.00791433
K00797	2.63189e-23	1.81179e-19	0.502218	0.027135	0.00511342	0.0134701	0.0108729	0.0336429	0.00812958
K00798	2.76785e-29	1.90539e-25	0.684443	0.0370934	0.00884418	0.00703316	0.00677001	0.0313592	0.0102675
K00800	1.37696e-27	9.47899e-24	0.646686	0.0636402	0.00517338	0.0453102	0.00315351	0.0581066	0.00753831
K00806	4.97998e-27	3.42822e-23	0.608509	0.0641154	0.00528037	0.0462264	0.00464832	0.0573146	0.00725449
K00809	5.81139e-31	4.00056e-27	0.53263	0.0146033	0.00476793	0.00133854	0.00214642	0.00999733	0.00703945
K00812	3.3632e-31	2.31523e-27	0.711703	0.062105	0.0156969	0.00828246	0.00799857	0.0490517	0.0176405
K00813	2.83317e-24	1.95036e-20	0.598269	0.0156203	0.00382738	0.0330368	0.00844932	0.0177913	0.00581981
K00817	3.32981e-27	2.29224e-23	0.626066	0.0854672	0.00880624	0.0510341	0.00889628	0.0809027	0.0157865
K00818	3.14134e-30	2.1625e-26	0.679665	0.0367857	0.00802382	0.00764285	0.00733469	0.0283548	0.00944171
K00820	4.01191e-25	2.7618e-21	0.580607	0.0637964	0.00556667	0.046782	0.00457749	0.0595654	0.0076413
K00826	1.96717e-31	1.3542e-27	0.658201	0.0970859	0.0138314	0.0487455	0.00607214	0.0828288	0.019782
K00831	1.81149e-24	1.24703e-20	0.511884	0.0523998	0.00429952	0.0418237	0.00320123	0.0509258	0.00567894
K00832	8.95121e-25	6.16201e-21	0.575436	0.0186211	0.0043609	0.0344191	0.0073939	0.0228472	0.00490446
K00835	8.23719e-22	5.67048e-18	0.56301	0.0183784	0.0041596	0.033319	0.00831145	0.0185081	0.00525345
K00845	9.28072e-24	6.38885e-20	0.578756	0.0573703	0.00878346	0.0218701	0.0177411	0.0507775	0.0110971
K00849	2.53926e-27	1.74802e-23	0.549573	0.0382844	0.00467495	0.0421072	0.00333018	0.0291823	0.00626745
K00850	1.06203e-25	7.31104e-22	0.536127	0.0667877	0.00888666	0.0452859	0.00455746	0.0559751	0.00974619
K00852	3.17257e-26	2.184e-22	0.565546	0.032759	0.00560515	0.0447132	0.00564186	0.0294319	0.00593559
K00858	3.4635e-25	2.38428e-21	0.566026	0.0650502	0.00511647	0.0478803	0.00646271	0.0585813	0.00671568
K00859	8.95576e-28	6.16514e-24	0.634999	0.0636639	0.00487638	0.0457552	0.00404044	0.0572822	0.00720094
K00867	1.04025e-23	7.16108e-20	0.583363	0.0189687	0.00532073	0.0354963	0.00820782	0.0178479	0.00653795
K00868	3.93524e-26	2.70902e-22	0.596912	0.0244355	0.00858531	0.0498734	0.00612313	0.0270281	0.0120983
K00878	1.25606e-27	8.64674e-24	0.664149	0.0197921	0.00569031	0.0385035	0.00557395	0.022128	0.00631362
K00882	1.15707e-27	7.96526e-24	0.687061	0.0221555	0.00805238	0.0419116	0.00418419	0.0217273	0.00609578
K00884	1.61418e-27	1.1112e-23	0.662033	0.0121295	0.0039897	0.0328824	0.00855029	0.0146334	0.00637367
K00885	1.12402e-27	7.73774e-24	0.664468	0.0116664	0.00403315	0.0327787	0.00848684	0.0143354	0.00660598
K00891	1.70286e-26	1.17225e-22	0.632617	0.0687688	0.00369616	0.053048	0.00708939	0.0671224	0.00470534
K00892	1.70054e-23	1.17065e-19	0.579105	0.0200144	0.00710334	0.0576927	0.0224069	0.0223276	0.00980943
K00927	6.40643e-28	4.41019e-24	0.638535	0.0642956	0.00517695	0.0458206	0.00392537	0.0577264	0.00736079
K00930	6.60706e-29	4.5483e-25	0.664601	0.0630793	0.00557949	0.0434312	0.00374404	0.0568971	0.00733588
K00931	5.69429e-28	3.91995e-24	0.566728	0.0609176	0.00579821	0.0442121	0.00378965	0.0534714	0.0074876
K00937	6.25503e-26	4.30597e-22	0.581627	0.0489388	0.00697715	0.0205505	0.013868	0.0437822	0.00922427
K00939	3.20975e-30	2.20959e-26	0.672816	0.0716524	0.00762382	0.0463912	0.0045912	0.0613858	0.00858159
K00940	2.72022e-28	1.8726e-24	0.658347	0.0624516	0.00571424	0.0437193	0.00279169	0.0571568	0.0073088
K00942	8.2496e-27	5.67903e-23	0.606332	0.0635979	0.00532477	0.0462409	0.00448906	0.0575482	0.00704544
K00945	6.48665e-27	4.46541e-23	0.611229	0.062014	0.00469675	0.04552	0.00378704	0.0563125	0.00708511
K00946	4.92432e-24	3.3899e-20	0.519173	0.0544471	0.0055056	0.0398683	0.00439759	0.0510402	0.00743111
K00948	6.49383e-27	4.47035e-23	0.531562	0.0686088	0.0059121	0.0479794	0.00579212	0.061878	0.0109691
K00951	4.78015e-26	3.29066e-22	0.542992	0.0627111	0.00659813	0.0455322	0.00386083	0.0637395	0.010617
K00954	2.89854e-28	1.99536e-24	0.642141	0.0637604	0.00497208	0.0456779	0.00384122	0.0571972	0.00715374
K00955	1.1531e-25	7.93793e-22	0.544924	0.0129874	0.00411094	0.00217388	0.00308971	0.0107671	0.00516333
K00962	1.84427e-27	1.26959e-23	0.633444	0.0639408	0.00504935	0.0456573	0.00381684	0.0574069	0.00750143
K00965	3.60565e-28	2.48213e-24	0.614638	0.0278485	0.00391897	0.0394833	0.00462522	0.0242323	0.00645715
K00966	2.20891e-27	1.52061e-23	0.557231	0.0112352	0.00408936	0.00177494	0.00244321	0.00581963	0.00352599
K00969	1.35188e-26	9.30636e-23	0.592153	0.0623717	0.00492888	0.0458561	0.0042119	0.0560447	0.00713485
K00971	9.47912e-23	6.52543e-19	0.50829	0.0397359	0.00639435	0.0176115	0.0129615	0.0345665	0.00698633
K00973	1.10091e-29	7.57866e-26	0.692465	0.0613577	0.0105355	0.0169134	0.0134761	0.0551506	0.0145794
K00979	3.42961e-24	2.36094e-20	0.500327	0.0521809	0.00673514	0.0364032	0.00658453	0.0501215	0.00745965
K00981	2.48249e-24	1.70894e-20	0.5681	0.0694618	0.00419186	0.0541786	0.00803256	0.0660117	0.00390062
K00992	1.61682e-30	1.11302e-26	0.64377	0.0160017	0.00441651	0.00183607	0.00245273	0.0206047	0.0088056
K00998	4.75584e-27	3.27392e-23	0.649671	0.0124412	0.00401907	0.0327919	0.00852441	0.0154485	0.00631739
K01006	1.26106e-29	8.68115e-26	0.641732	0.0233898	0.00596402	0.00438479	0.00454282	0.0152501	0.00655371
K01028	2.41847e-29	1.66487e-25	0.594624	0.0235037	0.0050876	0.00478829	0.00486469	0.0182141	0.00857778
K01029	4.613e-29	3.17559e-25	0.591818	0.0237713	0.00508593	0.00497121	0.0049937	0.0184291	0.00864927
K01048	4.0362e-26	2.77852e-22	0.589703	0.0199942	0.00367451	0.0387909	0.00966001	0.0224661	0.00610831
K01053	1.28076e-26	8.81672e-23	0.52452	0.015432	0.00593912	0.00229778	0.00331584	0.00930395	0.00550346
K01056	8.31945e-28	5.72711e-24	0.622197	0.0646148	0.00512842	0.0463668	0.00453732	0.0575412	0.00728665
K01075	4.43784e-27	3.05501e-23	0.509351	0.00535831	0.00186574	0.000401832	0.000983082	0.00538047	0.00330131
K01091	2.32145e-28	1.59809e-24	0.583771	0.0808382	0.0119445	0.0451837	0.00574264	0.0887136	0.0238519
K01092	6.98812e-25	4.81062e-21	0.551687	0.0736704	0.00771957	0.0479492	0.00633131	0.0689338	0.0139681
K01096	9.21083e-28	6.34074e-24	0.665669	0.0117382	0.00402427	0.0328633	0.008431	0.0148318	0.00647702
K01113	3.03732e-27	2.09089e-23	0.559956	0.0278379	0.00767483	0.00545415	0.00696347	0.0190285	0.00936861
K01119	3.41076e-27	2.34797e-23	0.650278	0.0199366	0.00538703	0.037925	0.00682542	0.02056	0.00594006
K01133	1.25634e-28	8.64866e-25	0.525959	0.00843881	0.00378393	0.000718826	0.00166604	0.00462434	0.00303443
K01141	4.12102e-22	2.83691e-18	0.525947	0.0186539	0.00400703	0.0333578	0.00815449	0.0231272	0.00438415
K01142	1.30137e-26	8.95864e-23	0.593625	0.0768969	0.00755709	0.0487451	0.00749514	0.0749143	0.014656
K01144	3.9931e-30	2.74885e-26	0.606154	0.0116797	0.00424909	0.00113283	0.0019905	0.00747527	0.00371311
K01146	9.4157e-27	6.48177e-23	0.646327	0.0127059	0.00406194	0.0328321	0.00849956	0.0155158	0.00631534
K01147	1.57514e-25	1.08433e-21	0.600515	0.0153243	0.00425417	0.0332974	0.00825691	0.0191581	0.00563654
K01150	5.9596e-29	4.10259e-25	0.640064	0.0136657	0.00403446	0.0351245	0.00971598	0.018116	0.00570905
K01151	5.28271e-28	3.63662e-24	0.670388	0.0227955	0.00449362	0.0385297	0.00486707	0.0234372	0.0057215
K01159	3.42593e-27	2.35841e-23	0.610402	0.0604468	0.00645227	0.040738	0.00405961	0.0554075	0.00847827
K01173	2.4551e-30	1.69009e-26	0.545188	0.0145503	0.00479327	0.00140135	0.00243266	0.0108372	0.00673265
K01175	2.59923e-24	1.78931e-20	0.570949	0.0160672	0.00429908	0.0328685	0.00855744	0.0207643	0.00453475
K01176	5.61188e-27	3.86322e-23	0.624913	0.0315845	0.00775202	0.0660712	0.0152558	0.0353096	0.0115208
K01182	3.29087e-22	2.26543e-18	0.56651	0.0110457	0.00529772	0.0299	0.0118728	0.00927898	0.0056073
K01226	5.59215e-28	3.84964e-24	0.673859	0.0141276	0.00526018	0.034933	0.0069321	0.0156813	0.00722299
K01243	1.08265e-26	7.45294e-23	0.651861	0.0317955	0.00867206	0.0671585	0.0171966	0.0309473	0.00921162
K01251	5.51845e-29	3.7989e-25	0.676841	0.0447834	0.00995691	0.00923052	0.007681	0.0363703	0.012768
K01258	1.56915e-23	1.0802e-19	0.578052	0.0456251	0.0100081	0.0920148	0.0293853	0.0395195	0.0155482
K01259	1.52053e-24	1.04673e-20	0.576275	0.020905	0.00505206	0.00536806	0.00594047	0.0210281	0.00749842
K01262	4.51251e-29	3.10641e-25	0.557833	0.069301	0.00727672	0.0462659	0.00489759	0.0613967	0.0115385
K01278	8.92343e-30	6.14289e-26	0.559292	0.0209749	0.00665221	0.00249685	0.0035397	0.0150313	0.00889478
K01304	9.67057e-21	6.65722e-17	0.504293	0.0131476	0.00558332	0.0281826	0.0117089	0.00920264	0.00549442
K01338	3.92193e-27	2.69986e-23	0.630045	0.0645479	0.00868182	0.0405116	0.00480777	0.0649947	0.011237
K01358	7.68971e-31	5.2936e-27	0.657692	0.0837514	0.00897225	0.0509363	0.0083328	0.068192	0.0111377
K01409	2.02849e-27	1.39642e-23	0.622028	0.0646298	0.00510424	0.0464231	0.00433676	0.0579846	0.0074404
K01424	2.18685e-22	1.50543e-18	0.514413	0.0604823	0.00574468	0.0786256	0.00985021	0.0601077	0.00888739
K01443	2.94783e-29	2.02928e-25	0.666119	0.0383563	0.00673011	0.069569	0.0161395	0.0327473	0.00944227
K01444	1.67418e-30	1.15251e-26	0.599692	0.0120784	0.00472717	0.00108853	0.00175958	0.00701983	0.0037522
K01465	3.51852e-29	2.42215e-25	0.694151	0.0912117	0.0110439	0.0490561	0.00659339	0.0840821	0.0164154
K01478	4.95928e-29	3.41397e-25	0.714893	0.0179715	0.0041747	0.0365024	0.00599252	0.0194765	0.00547692
K01484	4.90127e-27	3.37403e-23	0.601165	0.0159392	0.00416818	0.0333294	0.00809963	0.0216271	0.00453823
K01485	9.67126e-27	6.65769e-23	0.636905	0.0193055	0.00450002	0.0355178	0.00659481	0.0219115	0.00467514
K01491	4.13402e-28	2.84586e-24	0.639507	0.0654457	0.00535255	0.0462242	0.00424073	0.0581959	0.00752104
K01494	1.26673e-24	8.72016e-21	0.549635	0.0352059	0.00479874	0.0161332	0.0109711	0.0381478	0.00941998
K01495	1.98444e-27	1.36609e-23	0.568236	0.065039	0.00880734	0.0439563	0.00419576	0.0578756	0.00866674
K01496	4.82774e-28	3.32342e-24	0.638294	0.0290845	0.00626478	0.00552006	0.0052635	0.0259683	0.0106417
K01501	1.2403e-29	8.53821e-26	0.570775	0.0101976	0.00364262	0.000983587	0.00162671	0.0130568	0.00651038
K01507	7.00692e-22	4.82356e-18	0.500969	0.0451994	0.00616679	0.0220968	0.0150332	0.0444295	0.00881631
K01520	1.85458e-24	1.2767e-20	0.592119	0.045431	0.00577645	0.0195136	0.013652	0.044683	0.00885342
K01523	4.99495e-26	3.43852e-22	0.537717	0.0173126	0.00352585	0.00477534	0.00458864	0.0198839	0.00872132
K01524	1.7584e-26	1.21049e-22	0.567363	0.0846474	0.00784201	0.0601214	0.0110144	0.0757818	0.00708096
K01555	5.56453e-29	3.83062e-25	0.552552	0.0158308	0.00473084	0.00212631	0.00304707	0.0122436	0.00690023
K01560	3.58596e-22	2.46857e-18	0.514073	0.0235812	0.00601774	0.00611898	0.00735392	0.0207034	0.00849077
K01579	5.96567e-28	4.10677e-24	0.660145	0.0437837	0.00629463	0.0156583	0.0118911	0.0406531	0.00785975
K01580	2.18049e-28	1.50105e-24	0.665705	0.032531	0.00994431	0.0739986	0.0118132	0.0411171	0.0152167
K01586	5.86463e-28	4.03721e-24	0.644684	0.0692598	0.00571346	0.0468308	0.00501451	0.0617849	0.00903804
K01588	1.45428e-27	1.00113e-23	0.623727	0.0634722	0.00512623	0.0456709	0.00396413	0.0572468	0.00732132
K01591	9.72087e-28	6.69184e-24	0.621894	0.0631366	0.0049782	0.0457867	0.00414844	0.0566349	0.00698759
K01599	6.71368e-26	4.6217e-22	0.571694	0.0562087	0.00483198	0.0426643	0.00312401	0.0537417	0.00653281
K01609	1.98016e-29	1.36314e-25	0.696931	0.047794	0.00948683	0.0103121	0.00900889	0.040161	0.0127284
K01627	2.29582e-24	1.58044e-20	0.504124	0.0521303	0.00673977	0.0364155	0.00656488	0.0502506	0.0073425
K01633	5.89191e-26	4.05599e-22	0.536766	0.0549395	0.00486373	0.0429074	0.00351284	0.0514155	0.00533809
K01638	7.48816e-28	5.15485e-24	0.590469	0.0436986	0.00639986	0.0706165	0.0122428	0.0520887	0.00833457
K01639	1.18515e-27	8.15857e-24	0.669622	0.0135508	0.00420372	0.0338996	0.00788503	0.0154806	0.00656592
K01640	2.21856e-27	1.52726e-23	0.635569	0.0307996	0.00706683	0.00639752	0.00670254	0.0267937	0.0098397
K01647	7.37114e-27	5.07429e-23	0.604359	0.0707995	0.00712683	0.0474568	0.00680218	0.06312	0.00915677
K01649	1.03693e-28	7.13824e-25	0.664358	0.080975	0.0105687	0.0465793	0.00569094	0.0692444	0.012495
K01653	3.57586e-23	2.46162e-19	0.565584	0.0641543	0.00361104	0.0517945	0.0064158	0.0628622	0.00403095
K01657	7.64962e-27	5.266e-23	0.618144	0.0624524	0.00567188	0.0437272	0.00411736	0.0572102	0.00792711
K01662	4.56668e-27	3.1437e-23	0.601575	0.0591813	0.00535694	0.0433917	0.00332563	0.0557249	0.00699485
K01664	1.48833e-28	1.02457e-24	0.710254	0.0194838	0.00466795	0.0382229	0.0053796	0.019628	0.00650759
K01669	6.84553e-31	4.71246e-27	0.674742	0.0741779	0.0113426	0.0403635	0.00477613	0.0611131	0.0110323
K01673	8.81819e-29	6.07044e-25	0.616641	0.0685597	0.00932647	0.0440108	0.00417849	0.0594181	0.00906313
K01679	5.01031e-23	3.4491e-19	0.546432	0.0460629	0.00588093	0.0218043	0.0147499	0.0452136	0.00786639
K01681	3.07131e-24	2.11429e-20	0.575746	0.059662	0.00710048	0.0273895	0.0207693	0.0648109	0.0112146
K01687	1.628e-25	1.12072e-21	0.590471	0.0704065	0.00669388	0.0467152	0.00467507	0.0677479	0.012619
K01689	9.55815e-26	6.57983e-22	0.585358	0.0669179	0.00564865	0.0481057	0.00502409	0.0606835	0.00832453
K01693	2.12154e-26	1.46047e-22	0.609083	0.0348822	0.00649012	0.0094648	0.008434	0.0297918	0.0106541
K01695	1.9967e-27	1.37453e-23	0.637469	0.061513	0.00570477	0.0434418	0.00284946	0.0564851	0.00743482
K01696	2.99548e-26	2.06209e-22	0.614357	0.0635153	0.00531919	0.0458743	0.00440622	0.0579546	0.00718826
K01698	4.64293e-25	3.1962e-21	0.566684	0.0623323	0.0059496	0.0453556	0.00465882	0.0571753	0.0074675
K01703	1.14276e-25	7.86675e-22	0.599751	0.0635228	0.00615103	0.0445449	0.00326689	0.0590516	0.00887151
K01704	1.99153e-26	1.37097e-22	0.610363	0.0625706	0.00585944	0.0444837	0.00314017	0.0571275	0.00789604
K01710	4.5365e-29	3.12293e-25	0.666545	0.0652018	0.0114715	0.0218355	0.015654	0.0556788	0.0117139
K01711	5.47271e-28	3.76742e-24	0.63821	0.035367	0.00779509	0.011213	0.00927804	0.0295381	0.00564676
K01715	1.26111e-29	8.6815e-26	0.643401	0.0231746	0.00567444	0.00295922	0.00335915	0.0185045	0.00875645
K01724	1.0038e-29	6.91015e-26	0.702343	0.0388739	0.00908707	0.00535296	0.00546496	0.0326964	0.0122302
K01734	1.59714e-25	1.09947e-21	0.576239	0.0220418	0.00503435	0.0365808	0.0061597	0.0249742	0.00476097
K01735	6.40676e-29	4.41041e-25	0.644849	0.0682117	0.00715456	0.0458053	0.00419274	0.0589008	0.00818847
K01736	2.50226e-28	1.72256e-24	0.652976	0.0637535	0.00519385	0.0453236	0.00321781	0.0575571	0.00729845
K01739	6.07593e-28	4.18267e-24	0.598304	0.0328188	0.00484196	0.042723	0.00464638	0.027683	0.00573907
K01740	3.31713e-29	2.28351e-25	0.688567	0.0464403	0.00828002	0.0109347	0.00917226	0.0387429	0.0124607
K01744	2.25305e-28	1.551e-24	0.673652	0.0176709	0.00460733	0.0368008	0.00607802	0.0196712	0.00685084
K01752	8.30429e-24	5.71667e-20	0.545217	0.0667797	0.00650714	0.0877143	0.00768939	0.0662973	0.0119211
K01754	1.86391e-21	1.28311e-17	0.528402	0.0777128	0.00590635	0.0577548	0.0116339	0.0787758	0.00884498
K01755	9.57189e-29	6.58929e-25	0.671059	0.0557703	0.00714355	0.0201528	0.0151652	0.0503516	0.00883068
K01756	6.91814e-28	4.76245e-24	0.639554	0.0639491	0.00499568	0.0457521	0.00387416	0.0575353	0.00729457
K01766	6.76005e-28	4.65362e-24	0.665706	0.0118808	0.00406148	0.032884	0.00837462	0.0146492	0.00652855
K01768	4.78414e-27	3.2934e-23	0.559007	0.0285471	0.00892241	0.00518429	0.00591572	0.0241017	0.0110416
K01772	1.17968e-25	8.12094e-22	0.511702	0.0563143	0.00505841	0.0431899	0.00302476	0.0542511	0.00757741
K01778	1.09897e-27	7.56531e-24	0.620801	0.0601755	0.00591284	0.0426358	0.00354998	0.0553423	0.00706985
K01783	5.51777e-28	3.79843e-24	0.628652	0.0658087	0.00550915	0.04657	0.00496434	0.058353	0.00730299
K01788	2.45539e-29	1.69029e-25	0.726584	0.014123	0.00516881	0.0360635	0.00627481	0.0155041	0.00675878
K01792	3.58863e-21	2.47041e-17	0.544944	0.0203541	0.00433857	0.0342233	0.00764117	0.0215824	0.0045531
K01803	8.50693e-27	5.85617e-23	0.619316	0.0652373	0.00509241	0.0464946	0.00511074	0.0591098	0.0075667
K01808	6.76775e-25	4.65892e-21	0.512418	0.0427872	0.00809418	0.0173551	0.013681	0.0305246	0.00729867
K01810	4.76879e-28	3.28283e-24	0.645779	0.0662557	0.00563833	0.0456268	0.00393096	0.0609099	0.00863604
K01814	1.85479e-29	1.27684e-25	0.677249	0.0635582	0.00618267	0.0426794	0.00327052	0.0573945	0.00758895
K01817	1.26976e-29	8.74102e-26	0.700679	0.0509738	0.00916752	0.0115856	0.0101782	0.0416707	0.0128947
K01825	2.06865e-23	1.42406e-19	0.535608	0.017939	0.00434041	0.0331801	0.0082108	0.0227871	0.00427453
K01839	1.72891e-29	1.19018e-25	0.695624	0.0224864	0.00493134	0.0391681	0.00455281	0.0249868	0.00496173
K01845	2.17747e-25	1.49897e-21	0.540429	0.0631526	0.00608052	0.0464757	0.00586111	0.0559272	0.00672609
K01847	5.59429e-28	3.85111e-24	0.545581	0.039331	0.0114253	0.00811025	0.00881632	0.0289029	0.014202
K01866	9.52951e-28	6.56012e-24	0.634912	0.0644497	0.00509946	0.0459614	0.00420145	0.0582752	0.00743637
K01867	3.76734e-23	2.59343e-19	0.509642	0.0657656	0.00504949	0.0497819	0.00666267	0.0592943	0.00720513
K01868	7.49105e-28	5.15684e-24	0.633567	0.0644524	0.00512705	0.0461465	0.00428931	0.0580101	0.00723002
K01869	6.30371e-28	4.33948e-24	0.638042	0.0639582	0.00504882	0.0458033	0.0038703	0.057548	0.00727193
K01870	8.67082e-28	5.96899e-24	0.633432	0.0641045	0.00507824	0.0459186	0.00408361	0.0576234	0.00728243
K01873	6.64256e-28	4.57274e-24	0.638096	0.0639569	0.0050441	0.0457815	0.00387536	0.057635	0.00729815
K01874	1.0424e-27	7.17586e-24	0.62882	0.0643738	0.00511081	0.0460823	0.00421802	0.0577451	0.00737765
K01875	1.20439e-27	8.29102e-24	0.633044	0.0639857	0.0050523	0.0458973	0.00395326	0.0576403	0.00732311
K01876	3.07444e-29	2.11645e-25	0.639458	0.0681563	0.00702281	0.0462158	0.00412013	0.0591292	0.00819087
K01880	2.79036e-29	1.92088e-25	0.593932	0.0291831	0.00696994	0.00768891	0.00715195	0.0178089	0.00745694
K01881	6.60931e-28	4.54985e-24	0.633986	0.0644443	0.00522681	0.0459417	0.00401323	0.0578303	0.00742426
K01883	9.58789e-28	6.6003e-24	0.632858	0.0641847	0.00510688	0.0459802	0.00396606	0.0579944	0.00739465
K01885	4.86225e-29	3.34718e-25	0.658824	0.0719913	0.00812358	0.0439672	0.00506642	0.0632633	0.0107277
K01887	7.62556e-28	5.24944e-24	0.633345	0.0641251	0.00502257	0.0459455	0.00407487	0.0575939	0.00731506
K01889	8.57854e-28	5.90547e-24	0.633954	0.0639603	0.00504731	0.0458289	0.00397097	0.0575966	0.00732218
K01890	9.26958e-28	6.38118e-24	0.636775	0.0639689	0.0050408	0.0457375	0.00384165	0.0575931	0.00738698
K01895	5.5258e-25	3.80396e-21	0.572781	0.0766762	0.00797685	0.0504768	0.00967889	0.0715405	0.0111509
K01902	9.28197e-27	6.38971e-23	0.658366	0.0654102	0.00441242	0.0500938	0.00587404	0.064195	0.00453162
K01903	7.62941e-27	5.25208e-23	0.656437	0.0652912	0.00445202	0.0500707	0.00588887	0.0638348	0.00432263
K01912	6.29542e-26	4.33376e-22	0.57587	0.0264966	0.00638352	0.00554837	0.00637048	0.0220392	0.00966393
K01915	1.59501e-28	1.09801e-24	0.661933	0.113407	0.0142069	0.0565703	0.0127822	0.10202	0.0230608
K01918	1.67315e-27	1.1518e-23	0.6312	0.0615439	0.00555562	0.043172	0.00357087	0.0560783	0.0075695
K01921	5.49886e-25	3.78542e-21	0.574711	0.0720088	0.00425248	0.0549909	0.00894426	0.0679548	0.00429147
K01923	4.02426e-28	2.7703e-24	0.628683	0.0633667	0.00517839	0.0457393	0.00383296	0.0567449	0.00703387
K01924	7.28591e-28	5.01562e-24	0.61754	0.0640806	0.00526948	0.0461671	0.00439438	0.0568206	0.00712506
K01925	1.2557e-27	8.64427e-24	0.625531	0.0630103	0.00489886	0.0457673	0.00388847	0.0570494	0.00707335
K01928	5.14413e-25	3.54122e-21	0.553838	0.0660726	0.00594728	0.0474215	0.00720327	0.0580555	0.00715613
K01929	2.45824e-28	1.69225e-24	0.638902	0.0640693	0.00511141	0.0457619	0.00389986	0.0572451	0.00725263
K01933	1.21287e-27	8.34937e-24	0.62919	0.0636173	0.00505629	0.0457332	0.00395723	0.0573203	0.00727616
K01934	3.49622e-25	2.4068e-21	0.561869	0.0592559	0.00439733	0.0452663	0.00387542	0.0552265	0.00664961
K01937	4.67434e-29	3.21782e-25	0.674793	0.0634114	0.00514974	0.0444802	0.00311109	0.0573056	0.00714301
K01940	2.12774e-28	1.46474e-24	0.661938	0.0631626	0.00525361	0.04466	0.00288652	0.0571835	0.00723089
K01945	9.56259e-28	6.58288e-24	0.614096	0.0635522	0.00505661	0.046055	0.00431884	0.0565816	0.00711368
K01950	4.87673e-28	3.35714e-24	0.643548	0.0285976	0.00702677	0.00393755	0.00456808	0.0264139	0.0113978
K01951	1.10755e-25	7.62435e-22	0.571986	0.0735548	0.00679392	0.0493396	0.00694516	0.0690175	0.0120989
K01952	1.10746e-25	7.62379e-22	0.566286	0.10744	0.0130881	0.0622259	0.0179573	0.088809	0.0168325
K01955	7.25976e-28	4.99762e-24	0.634998	0.0670243	0.00549016	0.0473878	0.00545299	0.0604755	0.00723269
K01956	4.56017e-27	3.13922e-23	0.627597	0.0633528	0.00507212	0.0463726	0.00450573	0.0582459	0.00646865
K01961	5.93363e-26	4.08471e-22	0.561822	0.061063	0.00558377	0.0449026	0.00591848	0.0554501	0.00607371
K01963	6.43992e-27	4.43324e-23	0.569207	0.0574379	0.00510224	0.0430842	0.00337233	0.0533802	0.0065686
K01965	2.07983e-27	1.43175e-23	0.508909	0.0147483	0.00438923	0.00219327	0.00308433	0.0117223	0.00716989
K01966	2.16639e-25	1.49134e-21	0.525845	0.0262513	0.00577727	0.00769823	0.00761413	0.0177843	0.00782457
K01968	4.04599e-28	2.78526e-24	0.563183	0.0118413	0.00382857	0.00160499	0.00225681	0.0132938	0.00644223
K01972	1.519e-25	1.04568e-21	0.602905	0.0696397	0.00336596	0.0536781	0.00785424	0.0680363	0.00528568
K02005	1.53747e-26	1.0584e-22	0.605906	0.0476895	0.0108258	0.0124947	0.0114826	0.0400165	0.0136857
K02013	1.41052e-28	9.71005e-25	0.69207	0.139922	0.016673	0.198123	0.0190927	0.146854	0.0157104
K02015	4.72677e-29	3.25391e-25	0.681378	0.156513	0.0279416	0.245893	0.023488	0.171548	0.0277739
K02016	2.63839e-29	1.81627e-25	0.666719	0.141158	0.0184951	0.201824	0.0186073	0.153359	0.0180395
K02024	9.22128e-23	6.34793e-19	0.522702	0.012934	0.00396177	0.029808	0.00997455	0.016737	0.00521361
K02050	6.11633e-23	4.21048e-19	0.528713	0.0395107	0.00898775	0.0109507	0.0116995	0.0349282	0.0138901
K02051	3.25827e-22	2.24299e-18	0.500581	0.0378622	0.00825933	0.0121074	0.0129839	0.0377573	0.0139755
K02062	1.20258e-24	8.27859e-21	0.625332	0.0156952	0.00376127	0.0336114	0.00810519	0.0178101	0.00582427
K02063	9.93874e-24	6.84183e-20	0.607541	0.0170058	0.00366252	0.033888	0.00802173	0.0183186	0.00592387
K02064	9.08542e-24	6.2544e-20	0.609569	0.0170204	0.00366878	0.0339882	0.00803451	0.0183509	0.00591298
K02065	1.27636e-26	8.78644e-23	0.6121	0.0636239	0.00969657	0.0381185	0.00597156	0.0653162	0.0125648
K02066	2.00252e-27	1.37853e-23	0.580117	0.071022	0.0120417	0.0402064	0.00634908	0.0714597	0.0163505
K02069	7.86084e-27	5.4114e-23	0.656565	0.0216417	0.0049983	0.0375275	0.00570838	0.0231282	0.00470218
K02071	7.94167e-25	5.46704e-21	0.519947	0.0273872	0.00988309	0.0465654	0.00843162	0.026698	0.00799054
K02072	3.15967e-25	2.17511e-21	0.545055	0.0261083	0.00998673	0.0464617	0.00841057	0.0255638	0.00800682
K02109	1.55454e-26	1.07015e-22	0.59852	0.074064	0.00762825	0.0498953	0.00666275	0.0659345	0.00976016
K02114	3.47577e-22	2.39272e-18	0.500534	0.0652379	0.00543125	0.0487879	0.00629012	0.0598313	0.00823301
K02160	7.19843e-24	4.9554e-20	0.523147	0.0587717	0.00484198	0.0448871	0.00595591	0.0542694	0.00557014
K02173	2.64033e-23	1.8176e-19	0.547495	0.0115418	0.00427393	0.0296311	0.0100231	0.013747	0.00641203
K02204	5.05738e-27	3.4815e-23	0.522472	0.00792614	0.00320048	0.00132375	0.00193535	0.00964633	0.00453424
K02238	3.63886e-23	2.50499e-19	0.51672	0.0580546	0.00479884	0.0452666	0.00336347	0.0559388	0.00713983
K02259	3.56575e-28	2.45466e-24	0.621036	0.0432782	0.00904341	0.0123942	0.00947035	0.0339415	0.0113199
K02274	1.25736e-25	8.6557e-22	0.596474	0.0480746	0.00946844	0.0152732	0.0121387	0.0406892	0.0124998
K02275	1.00176e-26	6.89612e-23	0.615168	0.0504726	0.0102404	0.0152462	0.0123028	0.0412242	0.0123943
K02276	4.71152e-29	3.24341e-25	0.633403	0.0521925	0.0117237	0.012673	0.0102002	0.0425486	0.0154178
K02291	3.24779e-24	2.23578e-20	0.508929	0.01789	0.00535327	0.00395619	0.00511063	0.011503	0.00609566
K02313	3.31945e-29	2.28511e-25	0.659458	0.0669289	0.00594411	0.0459065	0.00403094	0.0590926	0.00785076
K02314	8.892e-25	6.12125e-21	0.577745	0.0694283	0.00362808	0.0541009	0.00807189	0.0662761	0.00412717
K02316	6.65734e-28	4.58291e-24	0.639885	0.0640769	0.00505509	0.0457964	0.00386855	0.0576798	0.00731278
K02334	2.34423e-27	1.61377e-23	0.626509	0.0324422	0.00926591	0.00535218	0.00700972	0.0257727	0.00986717
K02335	7.0062e-27	4.82307e-23	0.582812	0.0669228	0.00542936	0.0480136	0.00595635	0.0590372	0.00781312
K02336	6.60531e-26	4.5471e-22	0.625558	0.0142187	0.00424515	0.0330497	0.00830361	0.0167829	0.00605185
K02337	2.76298e-30	1.90203e-26	0.66564	0.0719098	0.00739026	0.0466793	0.00494186	0.062059	0.00889079
K02338	9.23971e-28	6.36061e-24	0.629621	0.0642219	0.00498912	0.0460543	0.00425405	0.0575841	0.00732086
K02340	1.4094e-27	9.7023e-24	0.629365	0.06328	0.00493503	0.045727	0.00383658	0.057246	0.00719971
K02341	2.67596e-28	1.84213e-24	0.639515	0.0641339	0.00521615	0.0456194	0.00387138	0.0574506	0.00734866
K02343	5.80109e-28	3.99347e-24	0.638359	0.0642587	0.00508924	0.0459653	0.00403154	0.0579307	0.00726776
K02344	1.53594e-27	1.05734e-23	0.664761	0.0117562	0.00402429	0.0327773	0.00855108	0.0144712	0.00641217
K02346	1.24094e-29	8.54263e-26	0.642587	0.0731674	0.00760695	0.0475091	0.00600415	0.0628232	0.00931472
K02357	6.18111e-28	4.25508e-24	0.638346	0.063945	0.00504821	0.0457642	0.00387163	0.0575264	0.00728138
K02398	1.53872e-25	1.05925e-21	0.511602	0.0222747	0.00402955	0.0357051	0.00673314	0.030858	0.00508233
K02399	1.4282e-26	9.83173e-23	0.607262	0.0151177	0.00437375	0.0330325	0.00825007	0.0200896	0.00475731
K02413	1.57422e-27	1.08369e-23	0.577314	0.0204446	0.00416762	0.0357633	0.00642722	0.0271552	0.00514271
K02414	5.57753e-27	3.83957e-23	0.582795	0.0147289	0.00430162	0.0318536	0.00818874	0.0199159	0.00489337
K02418	4.36221e-27	3.00295e-23	0.550319	0.0219945	0.00430317	0.0361393	0.00606351	0.0308273	0.00520145
K02428	9.00954e-31	6.20217e-27	0.634577	0.083934	0.0104847	0.0496726	0.00750448	0.0695204	0.012866
K02434	2.45629e-26	1.69091e-22	0.617513	0.0419976	0.00699721	0.0118648	0.0103477	0.0361307	0.0123701
K02435	3.71447e-26	2.55704e-22	0.611149	0.0414874	0.00693917	0.0118629	0.0103472	0.035631	0.0122881
K02437	1.34232e-23	9.24052e-20	0.525226	0.0660804	0.00584525	0.0482937	0.00695779	0.0587675	0.00767638
K02438	8.70775e-23	5.99441e-19	0.519095	0.0266028	0.00612495	0.0386536	0.00637355	0.0236284	0.00619561
K02439	6.37842e-27	4.39091e-23	0.626577	0.0140624	0.00418908	0.0329695	0.00832164	0.0179926	0.00554457
K02440	3.49735e-29	2.40758e-25	0.705322	0.0244171	0.00617109	0.0446613	0.00562832	0.0236804	0.00684736
K02441	7.4604e-24	5.13574e-20	0.552881	0.0175376	0.00396819	0.0331035	0.00829769	0.0221463	0.004271
K02445	1.52464e-26	1.04956e-22	0.646244	0.0138144	0.00408317	0.0337934	0.00799307	0.0159649	0.00701838
K02446	4.05733e-29	2.79307e-25	0.704051	0.022308	0.00407417	0.0389766	0.00495687	0.0207037	0.0065822
K02450	3.33715e-23	2.2973e-19	0.529059	0.0175609	0.00382765	0.032996	0.00851291	0.0227646	0.00468143
K02452	1.37837e-24	9.48868e-21	0.541774	0.0231749	0.0058608	0.041364	0.00577526	0.0304829	0.00838595
K02457	3.04237e-25	2.09437e-21	0.545525	0.0229731	0.00578941	0.041436	0.00599875	0.033522	0.00836795
K02461	7.91172e-24	5.44643e-20	0.514164	0.0245194	0.00548783	0.0415453	0.00596008	0.0326679	0.00824239
K02462	8.79847e-27	6.05687e-23	0.554545	0.0176306	0.00379647	0.0335125	0.00802369	0.025553	0.00466514
K02469	3.0995e-28	2.13369e-24	0.609234	0.0692806	0.00631353	0.0481294	0.00593369	0.0599066	0.00809759
K02470	3.44442e-28	2.37114e-24	0.611761	0.0696353	0.00635204	0.0482101	0.00589107	0.0602833	0.00823477
K02474	4.65294e-29	3.20309e-25	0.623095	0.0197311	0.00564701	0.00217333	0.00314645	0.0185016	0.00842648
K02478	1.5326e-26	1.05504e-22	0.627531	0.017294	0.00666289	0.04195	0.00586259	0.0237768	0.010465
K02488	5.11444e-26	3.52078e-22	0.525038	0.00648828	0.00225404	0.000755744	0.00155157	0.0052412	0.00291765
K02492	7.4331e-26	5.11694e-22	0.572615	0.0571935	0.00480256	0.0424203	0.00328881	0.052	0.00688508
K02493	3.19763e-27	2.20125e-23	0.615332	0.06646	0.00534188	0.0468378	0.00525067	0.0594633	0.00801197
K02496	5.12603e-24	3.52876e-20	0.559509	0.0176328	0.00400657	0.0332962	0.00816342	0.0223607	0.00428301
K02500	1.56227e-29	1.07547e-25	0.681004	0.0632694	0.00523009	0.0438779	0.00313656	0.0570986	0.0072071
K02501	2.08015e-29	1.43197e-25	0.67532	0.0623054	0.00527932	0.0435009	0.00320492	0.0567217	0.00699199
K02502	4.76998e-26	3.28365e-22	0.548751	0.0160537	0.0039216	0.00462573	0.0051999	0.0202903	0.00798336
K02503	8.75711e-28	6.02839e-24	0.62479	0.0619334	0.00496725	0.0450251	0.00407245	0.0561616	0.00671281
K02517	1.32091e-24	9.09316e-21	0.536575	0.0663631	0.0087633	0.042588	0.00832229	0.0690545	0.0145641
K02518	6.73967e-29	4.63959e-25	0.637975	0.0678464	0.00681431	0.0463693	0.00487552	0.0585046	0.00762907
K02519	8.19841e-28	5.64378e-24	0.63565	0.0639972	0.00505848	0.0458219	0.00393654	0.0576318	0.00731846
K02520	5.57694e-28	3.83917e-24	0.640379	0.0638844	0.0050202	0.0456869	0.00385768	0.0575173	0.00727093
K02521	2.08364e-25	1.43438e-21	0.598605	0.0149517	0.00427545	0.0329029	0.00852091	0.0191421	0.00514636
K02523	2.79416e-25	1.9235e-21	0.548065	0.054824	0.00711397	0.0368024	0.00636293	0.0528539	0.00818225
K02527	7.41132e-25	5.10195e-21	0.53229	0.0537617	0.00710946	0.0365729	0.00668474	0.0522558	0.00782797
K02528	7.63704e-28	5.25734e-24	0.635183	0.0639461	0.00504907	0.0458138	0.003963	0.0575322	0.00728538
K02536	4.93791e-28	3.39926e-24	0.562909	0.0664083	0.011322	0.0374401	0.00678031	0.0592008	0.0130327
K02549	2.39359e-30	1.64775e-26	0.704028	0.0249492	0.00458482	0.0405817	0.00436433	0.0209642	0.00698161
K02551	6.90677e-29	4.75462e-25	0.521008	0.0356072	0.00390909	0.042916	0.00527302	0.0284679	0.00723324
K02552	2.03803e-29	1.40298e-25	0.728081	0.0218477	0.00455333	0.0386004	0.00465616	0.0200468	0.00587933
K02553	3.11639e-19	2.14532e-15	0.532382	0.0302406	0.00718608	0.0613374	0.0201045	0.0329084	0.0081638
K02557	1.2994e-28	8.94508e-25	0.617283	0.0822792	0.0118373	0.0516412	0.00805797	0.0845116	0.0143119
K02560	5.64853e-27	3.88845e-23	0.647486	0.0124031	0.0041389	0.0327773	0.00855109	0.0150807	0.00646173
K02563	1.25328e-27	8.62761e-24	0.626638	0.0636595	0.00501411	0.0458329	0.00402728	0.0573435	0.00729088
K02565	1.39549e-27	9.60658e-24	0.665318	0.0118171	0.00402798	0.0328018	0.00853201	0.014607	0.00634388
K02567	7.0733e-26	4.86926e-22	0.563588	0.0139979	0.0039533	0.0330592	0.00827251	0.0172116	0.00860398
K02568	6.92651e-26	4.76821e-22	0.563986	0.0139767	0.0039561	0.0330592	0.00827251	0.0171515	0.00862384
K02569	1.37555e-27	9.46932e-24	0.657184	0.0128506	0.00393513	0.0330903	0.0082018	0.0156269	0.00642997
K02570	8.68614e-27	5.97954e-23	0.597794	0.0131851	0.003989	0.0330346	0.00827752	0.016462	0.00807489
K02572	3.01171e-26	2.07326e-22	0.629089	0.0130465	0.0039058	0.0328141	0.00857136	0.0160091	0.00661158
K02600	6.47565e-28	4.45784e-24	0.6382	0.0639775	0.00503655	0.0457822	0.00386459	0.057577	0.00730982
K02601	9.76704e-28	6.72363e-24	0.633931	0.0640478	0.0050383	0.0459502	0.00388424	0.0576008	0.00733631
K02613	6.04055e-30	4.15831e-26	0.543977	0.0173824	0.0050008	0.00272832	0.00363414	0.0112867	0.00706782
K02647	8.50977e-28	5.85813e-24	0.670353	0.0123974	0.00412497	0.0334043	0.00793052	0.0154124	0.0067249
K02657	5.26369e-30	3.62353e-26	0.558522	0.00752239	0.00330781	0.000676578	0.00135618	0.010828	0.00535555
K02658	1.40792e-29	9.69215e-26	0.559426	0.00814577	0.00329993	0.000764086	0.00170905	0.0113529	0.00562053
K02660	2.73702e-29	1.88416e-25	0.5444	0.00743541	0.00323913	0.000660978	0.00153404	0.010601	0.00541941
K02667	1.17642e-28	8.0985e-25	0.599263	0.011189	0.00397579	0.00111652	0.00224478	0.0133802	0.00591857
K02668	7.40069e-30	5.09463e-26	0.593407	0.00965661	0.00366215	0.000802006	0.00154002	0.0122572	0.00569569
K02674	2.47109e-30	1.7011e-26	0.573714	0.00946586	0.00404861	0.000750787	0.00152252	0.012889	0.00618
K02676	1.50982e-30	1.03936e-26	0.557562	0.0104218	0.00389813	0.000784248	0.00143564	0.0149096	0.00795374
K02686	1.24376e-27	8.56206e-24	0.655421	0.01267	0.00402931	0.0330059	0.00831695	0.0158581	0.0062423
K02687	1.30962e-24	9.01543e-21	0.516956	0.0542414	0.00471706	0.0422661	0.00388441	0.0532455	0.00656973
K02742	4.39701e-27	3.0269e-23	0.624692	0.0140683	0.00420545	0.0329573	0.00839787	0.0183222	0.00536087
K02759	3.99551e-22	2.75051e-18	0.506329	0.0160976	0.00838866	0.034112	0.00966046	0.0151358	0.00759011
K02769	1.31273e-27	9.03684e-24	0.657178	0.0133445	0.0047264	0.035523	0.00946929	0.0150033	0.00677136
K02770	1.11246e-29	7.65817e-26	0.730308	0.0329555	0.011124	0.0746303	0.0103173	0.0370633	0.0123484
K02777	1.3846e-28	9.53161e-25	0.704616	0.0154502	0.0063711	0.037138	0.00593709	0.0168817	0.00674831
K02779	6.73266e-29	4.63476e-25	0.716183	0.0135192	0.00478691	0.0350876	0.00688535	0.0155274	0.00637237
K02784	6.19288e-28	4.26318e-24	0.667101	0.0118016	0.00403869	0.0329138	0.00837871	0.0148621	0.00647073
K02791	4.14429e-26	2.85293e-22	0.612601	0.0182683	0.00816382	0.0435345	0.00544461	0.0222976	0.0114102
K02798	4.42168e-25	3.04388e-21	0.601736	0.0134111	0.00521743	0.0330264	0.00874458	0.0149512	0.00720903
K02800	2.46695e-24	1.69825e-20	0.563557	0.0180992	0.00747473	0.0423034	0.00696373	0.0232045	0.0118616
K02804	1.98668e-27	1.36763e-23	0.655028	0.0225376	0.0073853	0.0661146	0.0220489	0.0236913	0.0104418
K02819	1.67402e-27	1.15239e-23	0.6681	0.0140479	0.00519985	0.0347168	0.00720423	0.0156932	0.00708391
K02821	8.30311e-27	5.71586e-23	0.592609	0.0204239	0.00707379	0.043228	0.00503363	0.0295358	0.010018
K02822	3.28616e-28	2.26219e-24	0.691647	0.0137209	0.00527192	0.0344486	0.006776	0.0147419	0.00679778
K02824	3.67309e-29	2.52856e-25	0.688727	0.0196037	0.00564162	0.0387252	0.00537448	0.023238	0.00556634
K02825	1.92833e-25	1.32747e-21	0.542202	0.0424171	0.00959551	0.0116706	0.0111759	0.0346391	0.0142991
K02834	7.54993e-28	5.19737e-24	0.635171	0.064028	0.00505947	0.0458505	0.00395412	0.057586	0.00731332
K02835	7.46082e-28	5.13603e-24	0.636788	0.0639531	0.00504806	0.0458058	0.00390208	0.0575352	0.00728395
K02836	6.06085e-28	4.17229e-24	0.638402	0.0639221	0.00503714	0.0457642	0.00387163	0.0575275	0.00727354
K02838	6.18111e-28	4.25508e-24	0.638346	0.063945	0.00504821	0.0457642	0.00387163	0.0575264	0.00728138
K02851	1.33444e-30	9.18627e-27	0.688995	0.0269244	0.0054508	0.0451584	0.00704093	0.0230099	0.00676972
K02863	6.25354e-28	4.30494e-24	0.638254	0.0639332	0.00503933	0.0457642	0.00387163	0.0575292	0.00728301
K02864	4.93386e-28	3.39647e-24	0.637409	0.063705	0.00500151	0.045764	0.00387174	0.0572729	0.00715862
K02867	6.25354e-28	4.30494e-24	0.638254	0.0639332	0.00503933	0.0457642	0.00387163	0.0575292	0.00728301
K02871	6.18111e-28	4.25508e-24	0.6383	0.063945	0.00504821	0.0457642	0.00387163	0.0575292	0.00728301
K02874	6.18111e-28	4.25508e-24	0.6383	0.063945	0.00504821	0.0457642	0.00387163	0.0575292	0.00728301
K02876	6.78339e-28	4.66968e-24	0.637916	0.0639569	0.0050441	0.0457642	0.00387163	0.057577	0.00730982
K02878	6.18111e-28	4.25508e-24	0.6383	0.063945	0.00504821	0.0457642	0.00387163	0.0575292	0.00728301
K02879	8.2231e-28	5.66078e-24	0.631776	0.0639845	0.005052	0.0459381	0.00404203	0.0575548	0.00726911
K02881	6.18111e-28	4.25508e-24	0.6383	0.063945	0.00504821	0.0457642	0.00387163	0.0575292	0.00728301
K02884	6.0409e-28	4.15856e-24	0.637752	0.0639213	0.00503998	0.0457642	0.00387163	0.0574829	0.00728292
K02886	6.18111e-28	4.25508e-24	0.6383	0.063945	0.00504821	0.0457642	0.00387163	0.0575292	0.00728301
K02887	6.18111e-28	4.25508e-24	0.638253	0.063945	0.00504821	0.0457702	0.00386547	0.0575292	0.00728301
K02888	5.87706e-28	4.04577e-24	0.638257	0.0638951	0.00503219	0.0457642	0.00387163	0.0574686	0.00725654
K02890	6.16821e-28	4.24619e-24	0.639482	0.06388	0.00505586	0.0457066	0.00380512	0.057504	0.00727877
K02892	6.25354e-28	4.30494e-24	0.63833	0.0639513	0.00505508	0.0457642	0.00387163	0.0575354	0.00728226
K02895	6.18111e-28	4.25508e-24	0.6383	0.063945	0.00504821	0.0457642	0.00387163	0.0575292	0.00728301
K02897	8.32248e-29	5.72919e-25	0.667332	0.0635422	0.0051584	0.0442228	0.00353212	0.0569231	0.0073555
K02899	4.0222e-28	2.76888e-24	0.637585	0.0636368	0.00498358	0.045764	0.00387174	0.0571583	0.00710942
K02902	1.07186e-27	7.37867e-24	0.634498	0.0645233	0.00493771	0.0461571	0.00420684	0.0579491	0.00740186
K02904	6.18111e-28	4.25508e-24	0.6383	0.063945	0.00504821	0.0457642	0.00387163	0.0575292	0.00728301
K02906	6.18111e-28	4.25508e-24	0.6383	0.063945	0.00504821	0.0457642	0.00387163	0.0575292	0.00728301
K02909	1.3512e-25	9.30166e-22	0.583062	0.069087	0.00310069	0.0541754	0.00801901	0.0662248	0.00391738
K02911	4.56018e-27	3.13923e-23	0.618374	0.0629396	0.00470863	0.0459345	0.0041895	0.0571231	0.00706042
K02913	4.55264e-24	3.13403e-20	0.520192	0.0662957	0.00569776	0.0487274	0.0077765	0.058404	0.00689955
K02916	7.69359e-28	5.29627e-24	0.63635	0.0639181	0.00505711	0.0457702	0.00386547	0.0575146	0.00731067
K02926	6.18111e-28	4.25508e-24	0.6383	0.063945	0.00504821	0.0457642	0.00387163	0.0575292	0.00728301
K02931	6.18111e-28	4.25508e-24	0.6383	0.063945	0.00504821	0.0457642	0.00387163	0.0575292	0.00728301
K02933	6.18111e-28	4.25508e-24	0.6383	0.063945	0.00504821	0.0457642	0.00387163	0.0575292	0.00728301
K02935	6.18111e-28	4.25508e-24	0.6383	0.063945	0.00504821	0.0457642	0.00387163	0.0575292	0.00728301
K02939	6.18111e-28	4.25508e-24	0.6383	0.063945	0.00504821	0.0457642	0.00387163	0.0575292	0.00728301
K02945	3.01531e-29	2.07574e-25	0.660656	0.0675203	0.00623503	0.0457059	0.00403205	0.0591771	0.00810767
K02946	6.18111e-28	4.25508e-24	0.6383	0.063945	0.00504821	0.0457642	0.00387163	0.0575292	0.00728301
K02948	1.23276e-27	8.48631e-24	0.635677	0.0639449	0.00504832	0.0457642	0.00387163	0.0574857	0.00734853
K02950	6.18111e-28	4.25508e-24	0.6383	0.063945	0.00504821	0.0457642	0.00387163	0.0575292	0.00728301
K02952	6.18111e-28	4.25508e-24	0.6383	0.063945	0.00504821	0.0457642	0.00387163	0.0575292	0.00728301
K02954	9.13968e-26	6.29176e-22	0.566222	0.0650663	0.00575992	0.0477251	0.00598037	0.0576538	0.00668794
K02956	6.45231e-28	4.44177e-24	0.637268	0.0639279	0.00507491	0.0457642	0.00387163	0.0575292	0.00728301
K02959	1.08135e-28	7.44404e-25	0.628411	0.0631217	0.00505507	0.0457124	0.00388012	0.0553224	0.00684216
K02961	5.73864e-28	3.95048e-24	0.639894	0.0638942	0.00503682	0.0457009	0.0038321	0.0574878	0.00727743
K02963	8.71699e-28	6.00078e-24	0.636094	0.0645114	0.00500007	0.046032	0.00416875	0.0580878	0.00744239
K02965	6.32677e-28	4.35535e-24	0.638125	0.0639383	0.00504935	0.0457642	0.00387163	0.0575292	0.00728301
K02967	6.55133e-28	4.50994e-24	0.637648	0.063915	0.00504996	0.0457635	0.00387161	0.0575259	0.00728153
K02968	8.43679e-28	5.80788e-24	0.636648	0.0636737	0.00498174	0.0457076	0.0038542	0.0572163	0.00721652
K02970	2.03427e-28	1.40039e-24	0.552165	0.0633413	0.00738294	0.0422787	0.00398966	0.0584574	0.0109717
K02982	6.18111e-28	4.25508e-24	0.6383	0.063945	0.00504821	0.0457642	0.00387163	0.0575292	0.00728301
K02986	1.98594e-27	1.36712e-23	0.62104	0.0641335	0.00512221	0.0462481	0.00430682	0.0576436	0.00724336
K02988	6.18111e-28	4.25508e-24	0.6383	0.063945	0.00504821	0.0457642	0.00387163	0.0575292	0.00728301
K02990	4.24915e-24	2.92511e-20	0.544682	0.0591529	0.00446985	0.0455398	0.00371854	0.0561834	0.00702425
K02992	6.18111e-28	4.25508e-24	0.6383	0.063945	0.00504821	0.0457642	0.00387163	0.0575292	0.00728301
K02994	6.18111e-28	4.25508e-24	0.6383	0.063945	0.00504821	0.0457642	0.00387163	0.0575292	0.00728301
K02996	6.18111e-28	4.25508e-24	0.6383	0.063945	0.00504821	0.0457642	0.00387163	0.0575292	0.00728301
K03040	1.83694e-29	1.26455e-25	0.66765	0.0687811	0.00658604	0.0458715	0.00388649	0.0602882	0.00843476
K03043	9.2773e-28	6.38649e-24	0.636611	0.0639854	0.00503702	0.0457642	0.00387163	0.0576727	0.00738025
K03046	7.05552e-28	4.85702e-24	0.637272	0.0639624	0.00504987	0.045779	0.00388392	0.057577	0.00730982
K03070	1.43755e-25	9.89612e-22	0.55385	0.0691578	0.00589666	0.0498408	0.0070962	0.0606169	0.00791695
K03073	1.21586e-27	8.36995e-24	0.631995	0.0632593	0.0049839	0.0455612	0.00376698	0.0571913	0.00723642
K03075	1.82681e-27	1.25757e-23	0.629437	0.0638924	0.00503628	0.0457237	0.00384096	0.0573158	0.00751669
K03076	4.96687e-26	3.41919e-22	0.575649	0.0643325	0.0049572	0.047174	0.00501694	0.0578844	0.00761461
K03086	8.95595e-32	6.16527e-28	0.67143	0.0949948	0.015792	0.0487051	0.00775347	0.0711771	0.0142557
K03088	4.15378e-28	2.85946e-24	0.585244	0.360035	0.0733795	0.164761	0.0325197	0.275494	0.0822593
K03101	2.18499e-28	1.50415e-24	0.630834	0.0758099	0.00842252	0.0486237	0.00533649	0.0668654	0.0108993
K03106	5.37146e-28	3.69771e-24	0.639779	0.0639187	0.00503982	0.0457302	0.00383566	0.057477	0.00726869
K03110	5.26719e-28	3.62593e-24	0.639832	0.0639324	0.00504513	0.0457379	0.00383429	0.0574915	0.0072688
K03112	7.65745e-28	5.27139e-24	0.6424	0.0133815	0.00407512	0.032946	0.00832401	0.0177033	0.00553128
K03116	2.90543e-27	2.0001e-23	0.547554	0.075127	0.0087322	0.0497415	0.00783189	0.0666209	0.0114613
K03118	3.4314e-24	2.36218e-20	0.548068	0.0590951	0.00474934	0.0447683	0.00456196	0.0570316	0.00728066
K03148	4.64384e-27	3.19682e-23	0.655801	0.0127002	0.00391488	0.0330828	0.00844073	0.0152789	0.00642608
K03151	3.69667e-29	2.54478e-25	0.703995	0.018734	0.00545877	0.0384984	0.00519322	0.0220084	0.0059894
K03152	4.27139e-28	2.94042e-24	0.674358	0.0136055	0.0041422	0.0343314	0.00751239	0.0161893	0.0069073
K03168	5.96335e-27	4.10517e-23	0.612447	0.0660063	0.00557059	0.0467787	0.00496098	0.0604586	0.00805738
K03177	1.33706e-26	9.20432e-23	0.604369	0.0624247	0.0049451	0.0457483	0.00387937	0.0567932	0.00720774
K03179	7.62042e-28	5.2459e-24	0.604294	0.0632171	0.0101923	0.0374276	0.00606937	0.0565688	0.00943753
K03183	7.19901e-28	4.9558e-24	0.646984	0.0631401	0.00603344	0.0435113	0.00282838	0.0590038	0.0082946
K03184	9.07681e-28	6.24847e-24	0.640687	0.0135967	0.00400548	0.0329069	0.00848789	0.0183026	0.00498061
K03210	9.13811e-27	6.29067e-23	0.609613	0.0617545	0.00477498	0.045346	0.00391259	0.0564915	0.00701359
K03218	1.01994e-26	7.02125e-23	0.598491	0.0631628	0.00547147	0.0458756	0.00412359	0.0572409	0.00732968
K03291	1.64475e-23	1.13224e-19	0.551999	0.0109906	0.0040571	0.0295092	0.0101424	0.0138131	0.00640677
K03299	2.49699e-28	1.71893e-24	0.68475	0.020562	0.00531072	0.0427717	0.00766126	0.0214831	0.00750737
K03311	1.8172e-26	1.25096e-22	0.596079	0.0217622	0.00470726	0.0417598	0.00715829	0.0224811	0.009845
K03312	5.09133e-23	3.50487e-19	0.570035	0.0243221	0.00713284	0.058849	0.0205015	0.0250329	0.0107429
K03314	3.19059e-24	2.1964e-20	0.577244	0.0157265	0.00402644	0.0329439	0.00848549	0.0196069	0.0054935
K03315	2.63799e-19	1.81599e-15	0.505408	0.0356256	0.00704205	0.0623525	0.0192842	0.0322811	0.0105238
K03320	3.27572e-28	2.25501e-24	0.611985	0.0844861	0.012121	0.0486338	0.00677545	0.0736572	0.0149557
K03326	9.16753e-24	6.31093e-20	0.57923	0.0192075	0.00707589	0.0567985	0.0223231	0.0210929	0.0101794
K03402	2.45734e-28	1.69164e-24	0.662532	0.026552	0.00710739	0.0468919	0.00720708	0.023462	0.00779877
K03405	1.6359e-30	1.12615e-26	0.645832	0.0177893	0.00488448	0.0028354	0.00340191	0.0111155	0.0049738
K03414	7.65767e-28	5.27154e-24	0.571902	0.0178656	0.00436166	0.0359119	0.0092283	0.0248138	0.00439057
K03426	1.13158e-21	7.78979e-18	0.503418	0.0266058	0.00448282	0.037541	0.00542641	0.0283313	0.00423088
K03435	2.4227e-27	1.66778e-23	0.626655	0.013837	0.00420273	0.0330449	0.00843189	0.0183937	0.00549136
K03438	2.47416e-28	1.70321e-24	0.644838	0.0638771	0.00496168	0.0457751	0.00385304	0.057445	0.00711253
K03446	2.12352e-26	1.46183e-22	0.5999	0.0283913	0.00801933	0.0643571	0.016309	0.0347958	0.0124425
K03470	1.49067e-25	1.02618e-21	0.578422	0.060952	0.00478688	0.0456736	0.00384579	0.0561515	0.0069785
K03472	1.47564e-25	1.01583e-21	0.581881	0.0159942	0.00415774	0.0330168	0.00834484	0.0207261	0.00481835
K03473	3.66251e-23	2.52127e-19	0.530027	0.0180277	0.00421432	0.0331554	0.00827456	0.0232998	0.00421247
K03474	9.40385e-25	6.47361e-21	0.511058	0.0521934	0.00666356	0.0362622	0.00654029	0.0511656	0.00788874
K03475	4.98809e-29	3.4338e-25	0.724656	0.0143616	0.00519859	0.035898	0.00623486	0.0152811	0.00670752
K03478	2.25666e-27	1.55348e-23	0.646067	0.015046	0.00400171	0.0355668	0.00944192	0.0157854	0.0064986
K03485	8.04885e-26	5.54083e-22	0.60309	0.011291	0.00400072	0.0305854	0.00924348	0.0141104	0.00634075
K03495	1.47671e-26	1.01657e-22	0.591336	0.0573561	0.00515964	0.0422864	0.00396347	0.0547931	0.00672722
K03500	3.90097e-25	2.68543e-21	0.537562	0.0654054	0.0058965	0.0467971	0.00479481	0.0613937	0.010102
K03521	1.98607e-27	1.36721e-23	0.647971	0.0484419	0.00714718	0.017728	0.0135832	0.0486867	0.0102964
K03522	9.82063e-28	6.76052e-24	0.661136	0.0495067	0.00709645	0.0176961	0.0135196	0.0493432	0.0103854
K03524	2.03727e-27	1.40246e-23	0.630647	0.0648675	0.00529729	0.0460422	0.00420539	0.0585367	0.00765634
K03525	7.90822e-29	5.44402e-25	0.693221	0.0480692	0.0104287	0.0102644	0.00845479	0.0420737	0.013282
K03529	6.5946e-23	4.53972e-19	0.550697	0.0356479	0.00625183	0.0118498	0.0103549	0.0320046	0.0108055
K03530	5.13646e-29	3.53594e-25	0.611809	0.0795881	0.0104226	0.0475763	0.00568411	0.068602	0.0135891
K03532	1.52707e-28	1.05123e-24	0.508766	0.0142154	0.00420733	0.0417469	0.0194119	0.0171605	0.00692875
K03533	1.30899e-27	9.01109e-24	0.661949	0.0117623	0.00402576	0.0328035	0.00850713	0.0148357	0.0064692
K03536	1.72537e-26	1.18774e-22	0.602448	0.0618892	0.00468955	0.0456582	0.00389339	0.0564543	0.0070904
K03543	1.51581e-26	1.04348e-22	0.598766	0.0344234	0.00995289	0.0725416	0.0129587	0.0436484	0.0158396
K03544	2.98786e-28	2.05684e-24	0.643099	0.0642004	0.00519399	0.0457712	0.00386101	0.0577457	0.0072362
K03545	4.4171e-29	3.04073e-25	0.647198	0.0636167	0.00502189	0.0457609	0.00387191	0.0564531	0.0067362
K03546	2.65647e-27	1.82871e-23	0.629631	0.0264071	0.00571599	0.0406137	0.00383522	0.0264915	0.00547584
K03547	2.62496e-27	1.80702e-23	0.628846	0.0259382	0.00586995	0.040493	0.00415221	0.0257554	0.0056033
K03550	5.94732e-28	4.09414e-24	0.63688	0.0638679	0.00501246	0.0457642	0.00387163	0.0574585	0.00728917
K03551	6.45954e-28	4.44675e-24	0.639097	0.0639241	0.00503511	0.0457642	0.00387163	0.0576562	0.00727475
K03553	5.59119e-29	3.84898e-25	0.651274	0.0656863	0.0057282	0.0457918	0.00387984	0.0582222	0.00756211
K03555	8.54895e-27	5.8851e-23	0.585394	0.0574011	0.00521682	0.0423311	0.00382915	0.0544039	0.00677575
K03556	4.24931e-28	2.92523e-24	0.595899	0.0149183	0.00458781	0.0343453	0.00808192	0.0222174	0.00650548
K03564	4.51993e-29	3.11152e-25	0.647764	0.0681585	0.00773102	0.0439087	0.00341619	0.0602326	0.00947763
K03567	4.64494e-27	3.19758e-23	0.576211	0.0159969	0.00384741	0.0331722	0.00826053	0.0228945	0.00508393
K03570	1.98094e-24	1.36368e-20	0.502408	0.05417	0.00493454	0.0424013	0.00362477	0.0512826	0.00593054
K03572	5.02442e-26	3.45881e-22	0.554322	0.0564492	0.00513875	0.0422999	0.00387452	0.0534879	0.00676573
K03573	5.11101e-27	3.51842e-23	0.647893	0.0124091	0.00397743	0.0327773	0.00855109	0.0155722	0.00634178
K03575	1.09881e-26	7.56419e-23	0.592197	0.0606267	0.00472354	0.044942	0.00372152	0.0549422	0.0069363
K03580	1.0399e-22	7.15864e-19	0.530679	0.0179415	0.00424935	0.0331221	0.00827811	0.0222877	0.00456231
K03584	2.21527e-24	1.525e-20	0.545024	0.0582612	0.00440099	0.0452414	0.00372662	0.0545326	0.00630258
K03587	4.43289e-27	3.0516e-23	0.608128	0.0597231	0.00618202	0.0405411	0.00447558	0.0551468	0.00821996
K03588	1.75735e-24	1.20976e-20	0.555627	0.0641711	0.00486998	0.0479803	0.00643535	0.0582951	0.00635065
K03590	5.55078e-25	3.82115e-21	0.53094	0.0542607	0.00511419	0.0416395	0.00397084	0.052902	0.00639701
K03593	3.00514e-28	2.06874e-24	0.662952	0.0664984	0.00721752	0.0430539	0.00319806	0.0607401	0.00921169
K03594	3.37611e-26	2.32411e-22	0.610809	0.0313597	0.00592317	0.0115082	0.00961374	0.0350043	0.00863856
K03596	2.99146e-28	2.05932e-24	0.642017	0.0648923	0.00534917	0.0457937	0.00389703	0.0579564	0.00757256
K03597	8.54578e-24	5.88291e-20	0.555622	0.0173932	0.0041523	0.0331294	0.00821081	0.0218872	0.0044472
K03603	4.2347e-27	2.91517e-23	0.649839	0.0124061	0.00397695	0.0327773	0.00855109	0.0154698	0.00630024
K03604	1.64802e-27	1.13449e-23	0.666293	0.0118105	0.00403044	0.0328531	0.00849747	0.0145302	0.00642777
K03607	1.45814e-25	1.00378e-21	0.579354	0.0192054	0.00646981	0.0407544	0.00626436	0.0267349	0.00937919
K03609	1.23799e-24	8.52234e-21	0.500634	0.0241446	0.00453879	0.0369166	0.00593308	0.0316293	0.0050266
K03610	1.72574e-24	1.188e-20	0.500983	0.0240021	0.00456384	0.0367769	0.00598183	0.03149	0.00494232
K03624	1.14012e-25	7.8486e-22	0.556265	0.060042	0.00543055	0.0457386	0.00397298	0.0555411	0.00616367
K03625	1.10061e-24	7.57658e-21	0.566436	0.0596764	0.00451264	0.045417	0.00372595	0.0565438	0.00701514
K03628	2.41307e-29	1.66116e-25	0.668132	0.0689011	0.00712239	0.0447415	0.00391129	0.0598922	0.00881715
K03631	3.18516e-26	2.19266e-22	0.592397	0.0616377	0.00484312	0.0457241	0.00385603	0.0564416	0.00704675
K03632	1.27916e-27	8.80574e-24	0.665313	0.0117706	0.00402806	0.0327773	0.00855108	0.0145598	0.00634183
K03633	1.38174e-27	9.51191e-24	0.665296	0.0117587	0.00402168	0.0327773	0.00855108	0.014512	0.00637249
K03639	2.49021e-27	1.71426e-23	0.539367	0.0573401	0.00590289	0.0425361	0.00309801	0.0521523	0.00701324
K03644	8.34824e-28	5.74693e-24	0.653205	0.0618423	0.00587008	0.0426366	0.00300792	0.0567915	0.00765343
K03645	4.2347e-27	2.91517e-23	0.649839	0.0124061	0.00397695	0.0327773	0.00855109	0.0154698	0.00630024
K03650	7.66617e-28	5.27739e-24	0.625304	0.0601504	0.00592336	0.0422789	0.00391179	0.0559638	0.00718177
K03655	3.01448e-30	2.07517e-26	0.651966	0.0713456	0.00740202	0.0472318	0.00526379	0.0599475	0.00831204
K03657	1.84858e-23	1.27257e-19	0.507302	0.0995646	0.0115717	0.0633908	0.0165521	0.0820244	0.0147495
K03658	1.12333e-27	7.73298e-24	0.664745	0.011958	0.00407301	0.0328315	0.00852072	0.0149701	0.00615698
K03664	7.31615e-28	5.03644e-24	0.635355	0.0639513	0.00505508	0.0458179	0.00395323	0.0575354	0.00728226
K03668	2.54847e-29	1.75437e-25	0.567495	0.0140355	0.00416685	0.039713	0.0154919	0.0171869	0.00645752
K03671	4.31279e-30	2.96892e-26	0.66576	0.0989879	0.01284	0.0528705	0.0107707	0.0834381	0.0160646
K03672	4.06586e-21	2.79894e-17	0.533792	0.019402	0.00385611	0.0335108	0.00782715	0.0205919	0.00547114
K03673	9.8214e-24	6.76105e-20	0.514258	0.0339034	0.00745026	0.0633342	0.0170522	0.044975	0.00831227
K03674	1.56097e-26	1.07457e-22	0.599679	0.0148366	0.00418139	0.0328491	0.00857132	0.0204231	0.00466966
K03675	7.3585e-25	5.06559e-21	0.577563	0.0123193	0.00397179	0.03072	0.00924096	0.0149373	0.00651002
K03685	1.03567e-27	7.12953e-24	0.631854	0.0637755	0.00506844	0.0456534	0.00390799	0.057297	0.00737519
K03687	8.78697e-28	6.04895e-24	0.633656	0.0640691	0.00509702	0.0458693	0.00396969	0.0576737	0.00734493
K03695	8.95451e-29	6.16428e-25	0.655057	0.0651673	0.00543814	0.0450545	0.00387016	0.0580342	0.00785124
K03699	2.8111e-22	1.93516e-18	0.549894	0.0144213	0.00479764	0.0305093	0.0108277	0.0110995	0.00604874
K03701	1.07515e-31	7.40137e-28	0.667252	0.0890839	0.0111896	0.0498573	0.00749111	0.0723744	0.0139463
K03702	3.76749e-25	2.59354e-21	0.560683	0.0644029	0.00499382	0.0479942	0.00501546	0.0580213	0.00736809
K03703	1.40216e-27	9.65245e-24	0.629788	0.0642014	0.0050991	0.0460523	0.00406807	0.0577058	0.00734766
K03711	1.59252e-31	1.09629e-27	0.666786	0.0897426	0.0112472	0.0496708	0.00801695	0.0721492	0.0141948
K03717	1.96277e-25	1.35117e-21	0.615438	0.0151552	0.00400838	0.0332351	0.00825474	0.0181384	0.00566619
K03720	1.90146e-25	1.30896e-21	0.61234	0.0138969	0.004402	0.0329105	0.00851656	0.0162901	0.00651039
K03721	5.67135e-27	3.90416e-23	0.637911	0.0132926	0.00412063	0.0329561	0.00834	0.0165982	0.00615892
K03722	4.00869e-29	2.75958e-25	0.665233	0.0535617	0.00588304	0.0773016	0.00837027	0.0572213	0.00757225
K03723	6.94546e-25	4.78125e-21	0.555744	0.0648278	0.00501629	0.0484204	0.00524575	0.0583619	0.00733039
K03733	1.67306e-28	1.15174e-24	0.640924	0.0640426	0.00600619	0.0442411	0.00382159	0.0567307	0.00764544
K03742	5.61508e-29	3.86542e-25	0.585465	0.0303854	0.00809931	0.00681861	0.00688437	0.0196882	0.00893818
K03744	2.31237e-25	1.59184e-21	0.599768	0.0428623	0.00893526	0.0115764	0.0111273	0.0371804	0.0126354
K03747	3.28487e-24	2.2613e-20	0.532774	0.0174148	0.00388343	0.0332229	0.00835991	0.0236977	0.005019
K03764	4.2347e-27	2.91517e-23	0.649839	0.0124061	0.00397695	0.0327773	0.00855109	0.0154698	0.00630024
K03765	2.09018e-23	1.43888e-19	0.549335	0.0110715	0.00401931	0.0294081	0.0101973	0.0138776	0.00623138
K03767	2.98792e-26	2.05688e-22	0.593204	0.0254916	0.00498324	0.0387624	0.00477734	0.0277912	0.00451193
K03774	1.33024e-21	9.15738e-18	0.508444	0.0188026	0.00450787	0.0333755	0.00809318	0.0233727	0.00456322
K03778	2.83854e-26	1.95405e-22	0.62187	0.0218533	0.00416655	0.036731	0.00586241	0.0203145	0.00683102
K03782	3.66945e-26	2.52605e-22	0.511791	0.0338936	0.00613987	0.0136469	0.00963992	0.0347307	0.0116715
K03784	2.90906e-23	2.00259e-19	0.544322	0.0365421	0.00638294	0.0666684	0.0183137	0.0353254	0.0122101
K03787	3.30679e-24	2.27639e-20	0.514019	0.0528508	0.00718662	0.0368485	0.00598356	0.053465	0.00878812
K03793	1.12597e-30	7.75114e-27	0.532419	0.00655337	0.00304584	0.000315401	0.000720138	0.00853968	0.00466323
K03796	5.15718e-24	3.5502e-20	0.571999	0.0159201	0.00413	0.0329329	0.00851357	0.020204	0.00516785
K03797	8.38125e-31	5.76965e-27	0.659651	0.0974593	0.0156594	0.0450737	0.00757716	0.0840542	0.0209271
K03798	8.31689e-28	5.72534e-24	0.638441	0.0703952	0.00670398	0.0471532	0.00517432	0.0620354	0.0089947
K03801	9.43106e-26	6.49234e-22	0.538994	0.0542326	0.00538984	0.0396098	0.0045675	0.05089	0.00693159
K03803	2.53776e-22	1.74699e-18	0.505994	0.0192838	0.00380376	0.0334953	0.00811456	0.0246397	0.00442543
K03804	1.48153e-27	1.01989e-23	0.665119	0.0117468	0.0040163	0.0327773	0.00855108	0.0144641	0.00640957
K03810	1.81712e-27	1.25091e-23	0.63582	0.0122615	0.00447093	0.0317857	0.00836091	0.0141906	0.00642642
K03812	8.58288e-26	5.90846e-22	0.563127	0.0163555	0.0041938	0.0330214	0.00834558	0.0227729	0.0046489
K03817	2.2873e-27	1.57458e-23	0.651128	0.0144595	0.00493255	0.0339047	0.00750618	0.0156529	0.00670561
K03825	1.21851e-26	8.38821e-23	0.613487	0.011851	0.00403951	0.0312973	0.00889141	0.0150381	0.00634726
K03826	2.1881e-23	1.50629e-19	0.550736	0.0115486	0.00405341	0.0297079	0.0100098	0.0142819	0.00621857
K03830	1.65629e-27	1.14019e-23	0.643963	0.0149671	0.00402351	0.0335165	0.00786266	0.0178646	0.00556929
K03831	1.27297e-25	8.76312e-22	0.614296	0.0144979	0.00398963	0.0330932	0.00832654	0.016497	0.00663756
K03834	6.07397e-19	4.18132e-15	0.519385	0.0293744	0.0109482	0.0827107	0.0364384	0.0318184	0.015282
K03839	4.72413e-27	3.25209e-23	0.638569	0.0156232	0.0042817	0.0346604	0.00716599	0.0182339	0.00698969
K03840	1.51691e-26	1.04424e-22	0.645939	0.0129933	0.00406112	0.0328321	0.00849955	0.0155725	0.00612879
K03925	1.33413e-24	9.18416e-21	0.592585	0.0463194	0.00614108	0.0195833	0.0137311	0.0433096	0.0081858
K03931	1.21871e-27	8.38958e-24	0.661778	0.0116995	0.00401499	0.0328285	0.00852302	0.0146677	0.00658919
K03969	2.69931e-27	1.85821e-23	0.58458	0.0216622	0.00418419	0.0374786	0.00539337	0.0229427	0.0077728
K03970	4.45881e-26	3.06945e-22	0.632308	0.0141162	0.00378404	0.0331445	0.00834251	0.0167804	0.00618254
K03972	1.11554e-27	7.6794e-24	0.657405	0.0131303	0.00410199	0.0330459	0.0083086	0.016463	0.00562703
K03973	7.37095e-27	5.07416e-23	0.639601	0.0145773	0.00381271	0.0335176	0.00799	0.0175078	0.00611482
K03974	4.82646e-26	3.32254e-22	0.632594	0.0141413	0.00378658	0.0331478	0.00834378	0.0168878	0.00611018
K03976	1.15317e-28	7.93839e-25	0.694357	0.024505	0.0061794	0.0417792	0.00379583	0.0257568	0.00526761
K03977	6.25635e-28	4.30687e-24	0.633807	0.0639077	0.00503453	0.0458272	0.00398701	0.0574267	0.00727274
K03979	5.80866e-28	3.99868e-24	0.637918	0.0638888	0.0050253	0.0457716	0.0038775	0.0574624	0.00725728
K04013	9.13998e-26	6.29196e-22	0.597082	0.0112383	0.00399958	0.0305736	0.00925175	0.0143981	0.00649327
K04015	2.44468e-25	1.68291e-21	0.502049	0.0112446	0.00400253	0.0305736	0.00925176	0.0151834	0.0100431
K04018	2.25633e-25	1.55325e-21	0.5603	0.0112402	0.00400045	0.0305736	0.00925176	0.0147735	0.00789042
K04044	1.69516e-24	1.16694e-20	0.585785	0.0167639	0.004169	0.0333418	0.0080466	0.0173704	0.00644658
K04046	2.96149e-26	2.03869e-22	0.627878	0.0162755	0.00382056	0.0339588	0.00755928	0.0180955	0.00624509
K04066	7.85558e-28	5.40778e-24	0.636623	0.0639832	0.00503956	0.0457783	0.00388654	0.0576363	0.00735409
K04067	3.50722e-27	2.41437e-23	0.651697	0.0123255	0.0040093	0.0327773	0.00855109	0.0154016	0.0062777
K04068	3.63719e-29	2.50384e-25	0.726113	0.0154585	0.00524019	0.0367894	0.00606072	0.016357	0.00662136
K04069	6.43174e-29	4.42761e-25	0.672868	0.0412233	0.00988796	0.0801493	0.00800993	0.0502525	0.0151616
K04072	1.36591e-29	9.40296e-26	0.734243	0.0138898	0.00489261	0.0359679	0.00627975	0.0157339	0.00659134
K04075	2.15129e-27	1.48094e-23	0.628909	0.0639216	0.00523539	0.0457425	0.00388985	0.0577634	0.00744132
K04077	3.4236e-30	2.3568e-26	0.648298	0.0769017	0.00830673	0.049086	0.00678181	0.0636636	0.00949777
K04078	6.90574e-30	4.75391e-26	0.658637	0.0727953	0.00802454	0.0468328	0.00518964	0.061774	0.0089561
K04080	4.42621e-23	3.04701e-19	0.56617	0.0186123	0.00367925	0.0340946	0.00767559	0.0212844	0.00560109
K04082	3.85585e-23	2.65437e-19	0.55772	0.0177283	0.00394264	0.033366	0.00805246	0.0197707	0.00575418
K04096	5.52203e-29	3.80136e-25	0.626234	0.0621324	0.00466292	0.0457788	0.00406059	0.0547508	0.00630311
K04335	2.19417e-23	1.51046e-19	0.544851	0.0113218	0.00406941	0.0295796	0.0100352	0.0142573	0.00648319
K04337	3.3987e-23	2.33966e-19	0.538867	0.0113835	0.00411981	0.0294939	0.0100926	0.0145746	0.00631638
K04477	4.12065e-27	2.83666e-23	0.671805	0.0147687	0.00394697	0.0341836	0.00764254	0.0165373	0.0061092
K04487	7.84353e-25	5.39949e-21	0.509554	0.0829709	0.00907413	0.0555002	0.0133818	0.0684663	0.00989645
K04517	5.01545e-28	3.45264e-24	0.61269	0.0359829	0.00721611	0.0102638	0.00896222	0.0269668	0.00888613
K04691	9.82049e-24	6.76042e-20	0.564515	0.0167102	0.00451144	0.0331227	0.00827919	0.0203572	0.00498398
K04748	1.14509e-30	7.88283e-27	0.575842	0.00691772	0.00274833	0.000541426	0.00153038	0.0104062	0.00511552
K04763	1.12855e-27	7.76896e-24	0.605231	0.0729735	0.00802328	0.048219	0.00752138	0.0627743	0.00876749
K04770	1.32926e-27	9.15061e-24	0.662132	0.0118884	0.0040374	0.0327773	0.00855108	0.0147011	0.00635012
K04772	1.83063e-23	1.2602e-19	0.547788	0.0168884	0.00386	0.0330791	0.00834105	0.0211288	0.00554479
K05349	9.44714e-25	6.50341e-21	0.506833	0.0530603	0.0148997	0.0172395	0.0163311	0.03389	0.0114228
K05366	1.38567e-29	9.53894e-26	0.596746	0.0778225	0.0123302	0.045277	0.00650842	0.0652943	0.0126722
K05368	8.36578e-28	5.75901e-24	0.649082	0.0128801	0.00402383	0.0349693	0.00987952	0.0158333	0.00636564
K05499	5.36781e-27	3.6952e-23	0.652359	0.0134151	0.00433533	0.0332017	0.00814858	0.0154619	0.0062953
K05501	7.2545e-25	4.994e-21	0.573967	0.0163293	0.0042544	0.0330721	0.00836212	0.0215621	0.0044939
K05516	1.61895e-26	1.11449e-22	0.635902	0.027146	0.00528636	0.00983102	0.00804593	0.0289918	0.00588558
K05517	2.09495e-26	1.44217e-22	0.612273	0.01624	0.00659424	0.0406699	0.00615592	0.0232692	0.0106347
K05524	4.34119e-30	2.98848e-26	0.626912	0.0207121	0.00522729	0.0027281	0.0029469	0.0253929	0.0113753
K05526	6.32331e-27	4.35297e-23	0.588287	0.0157029	0.00434178	0.0329921	0.00830841	0.0218356	0.00435873
K05590	8.46799e-27	5.82937e-23	0.644731	0.0125533	0.00401696	0.0327773	0.00855109	0.0156066	0.00634874
K05591	1.13609e-23	7.82087e-20	0.51993	0.0187398	0.00413202	0.033412	0.00801408	0.0249324	0.00427183
K05592	4.10103e-27	2.82315e-23	0.511509	0.0676965	0.0090434	0.0455353	0.00539852	0.0596343	0.0110725
K05601	1.76878e-27	1.21763e-23	0.67021	0.0130343	0.00413241	0.0339042	0.00817009	0.0159387	0.00636096
K05606	8.78154e-29	6.04521e-25	0.603312	0.025815	0.00669882	0.00553093	0.00537501	0.0192937	0.00798839
K05775	3.22073e-28	2.21715e-24	0.670006	0.0118775	0.00402761	0.0328657	0.00839819	0.0150784	0.00615286
K05777	1.325e-25	9.12133e-22	0.607306	0.0148103	0.0040937	0.0329354	0.00852744	0.0186499	0.00525156
K05778	1.36451e-25	9.3933e-22	0.608094	0.0147774	0.00408958	0.0329334	0.00852833	0.0186043	0.00526236
K05779	5.52494e-26	3.80337e-22	0.616625	0.0145345	0.00405774	0.0329102	0.00853123	0.0183812	0.00516512
K05785	2.93395e-20	2.01973e-16	0.529938	0.0193018	0.00391319	0.0332683	0.00820498	0.0211531	0.00436528
K05787	2.32777e-27	1.60243e-23	0.600987	0.0151316	0.00407985	0.0329741	0.0083223	0.0206271	0.00490829
K05798	1.35625e-27	9.33645e-24	0.66494	0.0118997	0.00406368	0.032835	0.00856374	0.0147162	0.00623818
K05803	5.18437e-27	3.56892e-23	0.648479	0.0125407	0.00395003	0.0327951	0.00854671	0.0155166	0.00629576
K05805	3.91529e-26	2.69529e-22	0.626794	0.0152871	0.00385136	0.0336264	0.00795922	0.0178464	0.00615822
K05809	1.60721e-27	1.10641e-23	0.659869	0.0117606	0.00402623	0.0327773	0.00855109	0.0148614	0.00647018
K05812	4.01054e-27	2.76086e-23	0.619144	0.0146105	0.0043285	0.0330562	0.00816221	0.0188233	0.00534138
K05820	8.69147e-30	5.98321e-26	0.572755	0.0202641	0.00404114	0.0372745	0.00834686	0.0280826	0.0046272
K05837	6.19468e-27	4.26441e-23	0.575182	0.057676	0.00564292	0.0414845	0.0042964	0.0522234	0.00688383
K05851	1.94397e-27	1.33823e-23	0.642667	0.0134017	0.0039097	0.0329435	0.00832198	0.017126	0.00582723
K05896	4.85241e-25	3.3404e-21	0.587548	0.0393452	0.00695152	0.0118902	0.010535	0.0326991	0.0110903
K05916	1.59636e-28	1.09893e-24	0.686781	0.0203737	0.00518528	0.0380331	0.00510948	0.0223506	0.00556834
K05970	8.82151e-32	6.07273e-28	0.581933	0.0258079	0.0124879	0.00208494	0.00436944	0.00930758	0.00594557
K06006	1.95479e-27	1.34568e-23	0.656777	0.0119797	0.00409332	0.0327773	0.00855109	0.0152571	0.00627758
K06013	9.63629e-32	6.63362e-28	0.622209	0.0148437	0.00576396	0.00128421	0.00245341	0.00839707	0.00395096
K06024	4.40438e-23	3.03197e-19	0.555706	0.0358725	0.00637155	0.011691	0.0103001	0.0319999	0.010859
K06041	2.93976e-24	2.02373e-20	0.501003	0.0520334	0.00671503	0.0364546	0.00655627	0.0501563	0.00731827
K06132	3.66092e-24	2.52017e-20	0.540074	0.0182004	0.00621156	0.035816	0.00947012	0.0205295	0.00519539
K06134	2.65517e-29	1.82782e-25	0.588962	0.0122168	0.00418235	0.0013418	0.0021783	0.0156933	0.00735147
K06144	1.46297e-27	1.00711e-23	0.665384	0.0117343	0.00402785	0.0327773	0.00855108	0.0144521	0.00640308
K06149	3.62749e-24	2.49717e-20	0.526097	0.0217043	0.00649396	0.0408565	0.00603163	0.0297739	0.009144
K06153	3.64918e-25	2.51209e-21	0.554653	0.0639717	0.00490586	0.0475211	0.00618054	0.0576273	0.0067795
K06158	4.82328e-29	3.32035e-25	0.570472	0.0706458	0.0106353	0.0437438	0.00480395	0.0609031	0.0116378
K06168	1.26307e-27	8.69495e-24	0.644695	0.0619403	0.00598958	0.0430635	0.00316453	0.0569445	0.0075157
K06173	7.6885e-31	5.29276e-27	0.613337	0.0740144	0.00816715	0.047134	0.00543309	0.0631712	0.0112896
K06178	1.00606e-27	6.92569e-24	0.627596	0.063929	0.00521791	0.0458776	0.00395506	0.0574528	0.00731484
K06180	4.43144e-28	3.0506e-24	0.564088	0.106258	0.0153024	0.0590016	0.0167692	0.083008	0.0181905
K06183	3.40483e-22	2.34389e-18	0.519209	0.0378784	0.00703059	0.0661659	0.0165778	0.0383319	0.0125534
K06187	6.03863e-28	4.15699e-24	0.636643	0.0638733	0.00506138	0.0457626	0.0038676	0.0574886	0.00727369
K06195	2.14999e-22	1.48005e-18	0.514247	0.0328903	0.00671786	0.0141059	0.0103777	0.0312166	0.00705793
K06199	5.46426e-20	3.7616e-16	0.508959	0.058096	0.00725122	0.0278774	0.0188906	0.0534408	0.00996575
K06201	1.26224e-27	8.68929e-24	0.650103	0.0218023	0.00444386	0.0374135	0.00555296	0.0206136	0.00652123
K06202	2.83193e-27	1.9495e-23	0.646148	0.0137176	0.00395616	0.0332102	0.00814644	0.0162917	0.00627703
K06205	2.48818e-27	1.71286e-23	0.647951	0.0128044	0.0040072	0.0328928	0.008373	0.0159043	0.00628539
K06206	8.17165e-23	5.62536e-19	0.520877	0.020911	0.00367119	0.0343332	0.00740917	0.0255904	0.00405377
K06207	6.26961e-28	4.316e-24	0.637753	0.0639314	0.00505043	0.0456968	0.00394704	0.0575467	0.00730242
K06212	1.41723e-27	9.75621e-24	0.665239	0.0118275	0.00402326	0.0328166	0.00853881	0.0145329	0.00637959
K06217	1.57463e-21	1.08398e-17	0.505503	0.066385	0.00360134	0.0534728	0.00771335	0.0626582	0.00368405
K06219	4.78062e-25	3.29098e-21	0.592684	0.015525	0.00456034	0.0330683	0.0082545	0.0191723	0.00527857
K06223	1.04931e-25	7.22345e-22	0.612547	0.0153343	0.0040213	0.0334985	0.00805491	0.0172246	0.00659901
K06287	9.71526e-27	6.68799e-23	0.646012	0.067038	0.00680436	0.0441868	0.00350963	0.0645652	0.0104095
K06447	1.77442e-26	1.22151e-22	0.589558	0.0162985	0.00425349	0.0334064	0.00808626	0.0222387	0.00456069
K06518	5.23043e-27	3.60063e-23	0.634878	0.020648	0.00739779	0.0459012	0.00434851	0.0281293	0.0106665
K06596	3.57182e-29	2.45884e-25	0.532186	0.00721091	0.00330671	0.000657107	0.00151127	0.0104359	0.0054318
K06726	1.38316e-28	9.52164e-25	0.704786	0.014106	0.00506199	0.0356191	0.00673069	0.0155105	0.00696302
K06861	3.84592e-25	2.64753e-21	0.536857	0.0534005	0.00683225	0.036845	0.00623348	0.0528389	0.0080115
K06866	1.53594e-27	1.05734e-23	0.664761	0.0117562	0.00402429	0.0327773	0.00855108	0.0144712	0.00641217
K06871	1.92814e-24	1.32733e-20	0.564747	0.0440294	0.014264	0.114774	0.0410738	0.0505878	0.0214103
K06879	1.57933e-24	1.08721e-20	0.563364	0.0173652	0.00448132	0.0333725	0.00802456	0.0220446	0.00445229
K06881	3.28537e-26	2.26165e-22	0.541191	0.0296384	0.00731794	0.00860737	0.00842429	0.0187504	0.00775439
K06886	3.39004e-27	2.3337e-23	0.585352	0.0412486	0.00899736	0.012869	0.0101127	0.0310962	0.0102178
K06888	9.61117e-32	6.61633e-28	0.682194	0.0273284	0.00756469	0.00381737	0.00463752	0.0176708	0.00696959
K06899	3.82605e-27	2.63385e-23	0.607275	0.0150915	0.00414443	0.0329741	0.00832235	0.0202786	0.00471875
K06901	1.98864e-26	1.36898e-22	0.58916	0.0548132	0.0143928	0.0955947	0.00947506	0.0656535	0.0175713
K06902	4.11127e-25	2.8302e-21	0.571311	0.0253951	0.00528318	0.00625876	0.00684733	0.0212541	0.00859019
K06911	9.25714e-28	6.37262e-24	0.623782	0.084311	0.00894363	0.0553271	0.00955198	0.0809563	0.0112378
K06918	3.62242e-23	2.49367e-19	0.559372	0.0175822	0.00372819	0.0333334	0.00828496	0.0215645	0.00473416
K06923	1.71743e-29	1.18228e-25	0.581812	0.0106714	0.00350677	0.00139665	0.00186025	0.0142868	0.00679589
K06941	1.12091e-29	7.71635e-26	0.64578	0.0687433	0.00805716	0.0454469	0.00423553	0.0591005	0.0079858
K06942	5.58516e-28	3.84483e-24	0.639639	0.0639834	0.0050075	0.0457799	0.00388142	0.0575393	0.00728159
K06955	1.14493e-27	7.88169e-24	0.557336	0.0073216	0.00289343	0.000703534	0.0013318	0.00773086	0.00373549
K06956	7.04571e-24	4.85027e-20	0.574334	0.021934	0.00719144	0.0569466	0.0209025	0.0228456	0.0100849
K06957	6.78279e-25	4.66927e-21	0.578972	0.0157915	0.00409121	0.03282	0.00854392	0.0201538	0.0048262
K06966	4.10585e-29	2.82647e-25	0.687897	0.0829835	0.0102198	0.0465065	0.00528717	0.0784949	0.0146903
K06968	8.30311e-27	5.71586e-23	0.605616	0.015674	0.00414616	0.0331582	0.00819287	0.0208411	0.00448182
K06978	2.5923e-26	1.78454e-22	0.538255	0.0211126	0.00585986	0.00396682	0.00496967	0.0176372	0.00883075
K06985	1.39345e-26	9.59252e-23	0.601839	0.0109233	0.00318144	0.00159433	0.00253354	0.0101416	0.00424843
K06991	1.29202e-29	8.8943e-26	0.566767	0.01411	0.00458718	0.00115825	0.00187133	0.0131919	0.00726188
K06997	3.72173e-27	2.56204e-23	0.520613	0.0633409	0.00519819	0.0453267	0.00362935	0.0581136	0.010589
K06999	3.23307e-20	2.22565e-16	0.509604	0.0379658	0.00563106	0.0182048	0.0127363	0.0386471	0.00803541
K07000	4.35074e-25	2.99505e-21	0.614359	0.0305158	0.00771224	0.066106	0.0165525	0.0351456	0.0115047
K07003	2.87562e-30	1.97958e-26	0.644681	0.032425	0.00955885	0.00251249	0.0031627	0.028278	0.0133764
K07007	1.68289e-27	1.1585e-23	0.582559	0.063677	0.00847891	0.0432999	0.00485304	0.0585884	0.00789005
K07008	4.82807e-21	3.32364e-17	0.512431	0.0220369	0.00448415	0.0369097	0.00884467	0.0241457	0.0049299
K07011	7.18605e-29	4.94688e-25	0.634285	0.0243947	0.0064969	0.00280286	0.00439674	0.0208138	0.00940222
K07014	9.57021e-27	6.58813e-23	0.641456	0.0129939	0.00397282	0.03278	0.00855321	0.0164156	0.00590527
K07024	7.88174e-26	5.42579e-22	0.508597	0.0981298	0.0292665	0.155389	0.0303826	0.0857314	0.0294857
K07027	3.84091e-22	2.64409e-18	0.520761	0.0331571	0.00694027	0.0126636	0.0103777	0.0304222	0.0083268
K07028	2.79939e-26	1.9271e-22	0.525436	0.00607291	0.00226352	0.000575404	0.00167085	0.0060801	0.00314146
K07034	1.17111e-28	8.06194e-25	0.689455	0.0125067	0.00407266	0.0336953	0.00773121	0.0154331	0.00639173
K07037	4.51172e-30	3.10587e-26	0.559258	0.0215312	0.00683413	0.00398124	0.00501229	0.0126125	0.00685533
K07039	6.46875e-21	4.45309e-17	0.542486	0.0240142	0.00738945	0.0584469	0.021786	0.0278905	0.00845976
K07056	9.51517e-29	6.55024e-25	0.59758	0.0738559	0.00838345	0.046966	0.00495597	0.0654246	0.0123178
K07062	1.58555e-27	1.09149e-23	0.525615	0.0169403	0.00709929	0.00272236	0.00347311	0.00966158	0.00520779
K07070	2.661e-24	1.83183e-20	0.556609	0.0170814	0.00439509	0.0331221	0.00827814	0.0217385	0.00446838
K07075	5.46794e-26	3.76413e-22	0.505323	0.00824996	0.00359408	0.000975199	0.00190794	0.00884766	0.00449348
K07085	1.40574e-26	9.67714e-23	0.628222	0.0260043	0.00767462	0.0636421	0.0168253	0.0298648	0.0126561
K07091	6.95579e-26	4.78836e-22	0.555151	0.0544888	0.00509927	0.0444634	0.00580201	0.0582422	0.00465028
K07102	4.94814e-29	3.4063e-25	0.674508	0.0222736	0.00571002	0.00235321	0.00319096	0.022934	0.00924214
K07107	7.66462e-25	5.27633e-21	0.52711	0.129127	0.01546	0.0793195	0.0115564	0.12399	0.0304802
K07109	1.52367e-27	1.04889e-23	0.664559	0.0118661	0.00406862	0.0327773	0.00855105	0.0147205	0.00622923
K07117	3.2356e-26	2.22739e-22	0.50194	0.00833838	0.00397415	0.00119155	0.00212135	0.00384531	0.00230301
K07133	1.15045e-26	7.91969e-23	0.505706	0.0177432	0.00873922	0.00199755	0.00309004	0.0077722	0.00600313
K07139	7.06709e-29	4.86498e-25	0.711433	0.0169541	0.00395488	0.0372342	0.00603416	0.0186488	0.00697184
K07164	2.03676e-31	1.4021e-27	0.624565	0.0277485	0.00735275	0.00483247	0.00515908	0.0158238	0.00856308
K07173	1.88148e-29	1.29521e-25	0.711066	0.0179543	0.00582241	0.0387485	0.00507209	0.020409	0.00657829
K07180	3.38013e-27	2.32688e-23	0.611109	0.0191209	0.00392947	0.0350723	0.00699031	0.0233466	0.00466472
K07186	3.45208e-27	2.37641e-23	0.652648	0.0123135	0.0039825	0.0327773	0.00855109	0.0153835	0.00626745
K07223	4.8137e-26	3.31375e-22	0.622995	0.015136	0.00403124	0.0336761	0.00798007	0.017852	0.00631799
K07227	1.91277e-27	1.31675e-23	0.657884	0.0119254	0.00399081	0.032833	0.00858271	0.0149392	0.0064636
K07235	9.52835e-22	6.55932e-18	0.524509	0.0184364	0.0041259	0.0331221	0.00827814	0.0221791	0.00440916
K07236	8.63034e-23	5.94112e-19	0.54089	0.0176914	0.00410984	0.0330188	0.00834387	0.0217472	0.00446477
K07237	1.85111e-24	1.27431e-20	0.566706	0.0167486	0.00411916	0.0329762	0.00832134	0.0212554	0.00451913
K07261	3.89016e-24	2.67798e-20	0.605856	0.0158879	0.00338279	0.0333231	0.00831546	0.0177781	0.00610785
K07269	1.3642e-27	9.39113e-24	0.665559	0.0117462	0.00403324	0.0327773	0.00855108	0.0145	0.00636606
K07277	5.68549e-25	3.91389e-21	0.540935	0.0538617	0.00686605	0.0367751	0.00625591	0.0528351	0.00816252
K07283	1.8545e-26	1.27664e-22	0.616376	0.0151909	0.00386258	0.0333708	0.00829422	0.019767	0.00516212
K07285	1.8287e-25	1.25888e-21	0.600949	0.0171853	0.0063124	0.0407692	0.00614532	0.023135	0.010782
K07286	1.06199e-26	7.31074e-23	0.616587	0.0145595	0.00423501	0.0329748	0.0083234	0.0187713	0.00525269
K07289	1.76441e-25	1.21462e-21	0.551905	0.0179836	0.0038591	0.0332963	0.00817283	0.0239829	0.00381608
K07302	7.55426e-28	5.20035e-24	0.571182	0.0216348	0.00746817	0.0026947	0.00388673	0.0189022	0.00907036
K07303	1.36453e-27	9.39341e-24	0.559721	0.021044	0.00737799	0.00270334	0.00397255	0.0183361	0.00893754
K07304	3.89562e-28	2.68174e-24	0.633946	0.0832921	0.0102181	0.0472975	0.00831018	0.0727077	0.0145135
K07305	9.25377e-30	6.3703e-26	0.637128	0.0737148	0.00872193	0.0434984	0.00458908	0.0641171	0.0128627
K07307	5.46296e-28	3.7607e-24	0.659071	0.0120186	0.00409269	0.033792	0.00908963	0.0152111	0.00649841
K07337	3.10238e-24	2.13568e-20	0.592257	0.0155589	0.00394481	0.0329358	0.00843123	0.0183166	0.00568948
K07340	5.13576e-22	3.53546e-18	0.505452	0.0199519	0.00369367	0.0339802	0.00778233	0.0237607	0.00526255
K07343	8.33612e-23	5.73859e-19	0.572756	0.0215844	0.00689646	0.0581731	0.022074	0.0231241	0.010214
K07391	2.69606e-27	1.85596e-23	0.608426	0.0604804	0.0063867	0.040787	0.00418369	0.0554094	0.00851122
K07447	5.47896e-28	3.77172e-24	0.633196	0.0635033	0.00496956	0.0457191	0.00381049	0.0570099	0.00719983
K07459	2.95959e-26	2.03738e-22	0.64257	0.0135807	0.00381512	0.0330981	0.00848471	0.0154539	0.00641213
K07460	1.63767e-27	1.12737e-23	0.609264	0.0602629	0.00643755	0.0406295	0.00405934	0.0550071	0.00841344
K07462	2.89338e-26	1.9918e-22	0.57104	0.0569977	0.00494907	0.04243	0.00403627	0.0545529	0.0069461
K07478	1.35669e-27	9.33943e-24	0.627856	0.0635334	0.00499815	0.0458489	0.00402221	0.0575939	0.00721692
K07479	7.2476e-27	4.98925e-23	0.646168	0.0125503	0.0040163	0.0327773	0.00855109	0.0155391	0.0063162
K07501	1.52962e-32	1.05299e-28	0.58588	0.0161986	0.00527145	0.00114339	0.00195838	0.0108359	0.0069295
K07516	2.03514e-27	1.40099e-23	0.610641	0.0236043	0.00624117	0.00451668	0.00515945	0.021908	0.00856253
K07560	1.12842e-23	7.76807e-20	0.501073	0.0569986	0.00462292	0.0443514	0.00366708	0.0529644	0.00677208
K07566	2.88713e-27	1.9875e-23	0.609935	0.0598082	0.00596317	0.0426641	0.00376018	0.0555975	0.00705165
K07568	2.24446e-27	1.54509e-23	0.633749	0.0644956	0.00690089	0.0430665	0.00365268	0.0591885	0.0088743
K07577	3.51259e-25	2.41806e-21	0.550345	0.00958402	0.00305936	0.00164891	0.00233902	0.00868564	0.00390956
K07588	8.81602e-28	6.06895e-24	0.574868	0.0264171	0.00720412	0.00574076	0.00593367	0.0192325	0.00848465
K07636	7.85061e-30	5.40436e-26	0.535862	0.0747973	0.0116713	0.0424176	0.00555161	0.0655533	0.0172851
K07637	9.88841e-28	6.80718e-24	0.574756	0.0145821	0.0037655	0.0330021	0.00833022	0.0206936	0.00668886
K07638	7.09342e-23	4.88311e-19	0.553763	0.0188335	0.00399671	0.0339685	0.00767881	0.0207212	0.00578935
K07640	8.25511e-25	5.68282e-21	0.61777	0.014535	0.00409452	0.0330858	0.00841478	0.0164764	0.00630506
K07644	5.96823e-22	4.10853e-18	0.506811	0.013004	0.00435284	0.0301218	0.00976057	0.016035	0.00682303
K07647	1.69898e-27	1.16958e-23	0.65738	0.0120539	0.00394868	0.0328463	0.00857425	0.0151481	0.0063752
K07648	1.62913e-27	1.1215e-23	0.662726	0.0119504	0.0040651	0.0327773	0.00855108	0.0148993	0.00619027
K07659	1.94397e-21	1.33823e-17	0.528152	0.0197046	0.00410372	0.034065	0.007744	0.0211773	0.00579549
K07660	1.45082e-26	9.98742e-23	0.538446	0.0159834	0.00380792	0.0330022	0.00833014	0.0230579	0.00630284
K07662	7.47477e-26	5.14563e-22	0.616393	0.0144074	0.00419312	0.0329333	0.00842759	0.0179932	0.00552345
K07674	2.72847e-27	1.87828e-23	0.653012	0.0120494	0.00405777	0.0328026	0.0085477	0.0151687	0.0064839
K07675	1.57825e-27	1.08647e-23	0.659008	0.0130063	0.00413015	0.0332546	0.00802171	0.01529	0.00665193
K07678	6.10559e-25	4.20309e-21	0.562462	0.0167323	0.00435625	0.0330885	0.00826595	0.0222493	0.00444129
K07685	2.3016e-27	1.58442e-23	0.659369	0.0120801	0.00396062	0.0328767	0.00850802	0.0151974	0.00636085
K07686	1.79137e-27	1.23318e-23	0.662238	0.0117974	0.00410286	0.0328013	0.00852458	0.0144204	0.00652822
K07689	2.55527e-25	1.75905e-21	0.598978	0.0150946	0.00411883	0.0329453	0.00845346	0.0194325	0.00516769
K07713	4.7822e-23	3.29207e-19	0.502436	0.0267092	0.00761676	0.00901967	0.00813349	0.0204716	0.00578994
K07734	8.80935e-27	6.06436e-23	0.591953	0.0120366	0.00345441	0.00196906	0.00295045	0.00908698	0.00393323
K07740	1.75189e-25	1.206e-21	0.578476	0.0163759	0.00404098	0.0330168	0.00834485	0.0213384	0.00444504
K07746	2.83255e-29	1.94993e-25	0.590572	0.0131684	0.00506214	0.00124207	0.00230832	0.00943052	0.00441345
K07751	5.65225e-28	3.89101e-24	0.637042	0.0130695	0.00402564	0.0361347	0.0109876	0.016061	0.00642966
K07772	1.52635e-27	1.05074e-23	0.657792	0.0120212	0.00398077	0.0327886	0.00856168	0.015389	0.0062237
K07773	4.17666e-27	2.87521e-23	0.649752	0.0124322	0.00396805	0.0327881	0.0085314	0.0155225	0.00630837
K07783	1.74379e-28	1.20043e-24	0.649545	0.01239	0.00408238	0.0361315	0.0109546	0.0150396	0.00669777
K07784	3.39345e-26	2.33605e-22	0.635111	0.0130645	0.00413008	0.0329096	0.00858177	0.0152331	0.00662928
K07791	2.801e-28	1.92821e-24	0.686618	0.0127784	0.00437954	0.0339485	0.00782285	0.0153114	0.00633621
K07792	7.94732e-23	5.47094e-19	0.547939	0.0189903	0.00707194	0.0544531	0.0225266	0.0209615	0.00992349
K07811	6.89136e-29	4.74401e-25	0.576401	0.0130975	0.00415325	0.0395181	0.0156727	0.0160559	0.00672181
K07812	6.89816e-22	4.7487e-18	0.536237	0.0193024	0.00693949	0.0543021	0.0227092	0.0211523	0.0103593
K07821	2.4825e-23	1.70895e-19	0.548544	0.0110238	0.00399647	0.0294081	0.0101973	0.0137297	0.0064054
K07862	1.41459e-27	9.73802e-24	0.654738	0.0146812	0.00434934	0.0340115	0.0077576	0.0171265	0.00603562
K08082	1.25827e-29	8.66196e-26	0.526144	0.00684268	0.00322297	0.000696204	0.00134146	0.0103604	0.0054774
K08083	7.17313e-29	4.93798e-25	0.546629	0.00808949	0.00338599	0.00105218	0.0018583	0.0118694	0.00583496
K08154	2.62932e-28	1.81002e-24	0.659354	0.0122014	0.00406715	0.0349693	0.00987952	0.0151884	0.00653932
K08289	2.39341e-27	1.64762e-23	0.59588	0.0188171	0.00372287	0.0346847	0.0071595	0.0241324	0.0047376
K08303	1.11576e-27	7.68092e-24	0.64305	0.0625615	0.00957327	0.109728	0.0194052	0.07106	0.0149948
K08306	5.18646e-23	3.57036e-19	0.56694	0.0201447	0.00719309	0.056628	0.0222653	0.0221193	0.00980656
K08310	3.58694e-23	2.46925e-19	0.538439	0.0121425	0.00407142	0.0297498	0.0100395	0.0154926	0.00562611
K08312	3.27343e-24	2.25343e-20	0.574288	0.0167193	0.00405816	0.0330972	0.00827946	0.0206826	0.00474251
K08325	5.43254e-23	3.73976e-19	0.562406	0.0203083	0.00372854	0.0341086	0.00735388	0.0195902	0.00594122
K08483	3.68092e-24	2.53395e-20	0.5127	0.0327539	0.00496358	0.0422143	0.00399433	0.03138	0.0049735
K08485	5.91198e-27	4.06981e-23	0.624333	0.0138968	0.00411946	0.0328682	0.00851916	0.0184788	0.00523682
K08641	1.10406e-32	7.60035e-29	0.568186	0.0171081	0.0061677	0.00151824	0.00238126	0.0106019	0.00684149
K08680	6.54029e-28	4.50234e-24	0.655811	0.0218112	0.00433063	0.0367403	0.00581453	0.0195403	0.00616274
K08714	1.42386e-28	9.80185e-25	0.534318	0.00840259	0.00254923	0.000865507	0.00146992	0.00959946	0.00540482
K08738	4.17467e-26	2.87385e-22	0.584277	0.0271353	0.00775929	0.00457283	0.0061832	0.0267369	0.0115279
K08744	3.16669e-27	2.17995e-23	0.597104	0.0206546	0.0048977	0.00436165	0.00473739	0.0152642	0.00665088
K08963	1.12325e-26	7.73248e-23	0.589597	0.0168522	0.00454495	0.00333749	0.00450593	0.018792	0.00745825
K08973	7.27252e-30	5.00641e-26	0.725188	0.0293345	0.00714879	0.00291751	0.00332009	0.0286893	0.0102477
K08976	1.10628e-30	7.61563e-27	0.548224	0.0195701	0.00611126	0.00381611	0.00433291	0.0113298	0.00662261
K08984	1.25381e-27	8.6312e-24	0.671073	0.0151045	0.00399629	0.0347058	0.00730419	0.0177838	0.00631306
K08990	2.92944e-23	2.01663e-19	0.564001	0.017514	0.00363256	0.0333334	0.00828498	0.0214095	0.00474145
K08992	7.09895e-26	4.88691e-22	0.60673	0.014471	0.00421606	0.0328239	0.0085435	0.0187575	0.00526907
K08993	1.66386e-27	1.1454e-23	0.656028	0.0119872	0.00403234	0.0328531	0.00847846	0.0151035	0.00656747
K08998	2.15052e-27	1.48042e-23	0.652708	0.0468855	0.00811634	0.0122004	0.0110895	0.0399422	0.0127286
K08999	8.05239e-32	5.54327e-28	0.636542	0.0283754	0.00767026	0.00461275	0.00492253	0.0166136	0.00860801
K09005	9.19962e-29	6.33302e-25	0.640697	0.0164014	0.00448116	0.00191678	0.00256409	0.0150983	0.0065765
K09007	1.73809e-27	1.1965e-23	0.59051	0.0139225	0.00445242	0.00190649	0.00272066	0.0144825	0.00640196
K09013	4.35996e-25	3.0014e-21	0.583295	0.0524564	0.00746296	0.0222768	0.0152032	0.04736	0.0091422
K09014	7.02475e-23	4.83584e-19	0.542551	0.0487256	0.00665617	0.0220986	0.0150325	0.0435489	0.00801193
K09015	2.78363e-22	1.91625e-18	0.537886	0.0473357	0.0065013	0.021606	0.0148185	0.0429519	0.00789052
K09161	1.5072e-27	1.03756e-23	0.664829	0.011771	0.00400787	0.0327785	0.00855191	0.0144824	0.00640606
K09165	2.22239e-28	1.5299e-24	0.510591	0.0134453	0.00446591	0.00120275	0.00238863	0.0132536	0.00809898
K09457	1.4425e-23	9.93017e-20	0.527199	0.0153101	0.00401829	0.0042289	0.00459039	0.0153042	0.00589516
K09690	3.10026e-30	2.13422e-26	0.662138	0.0158409	0.00511265	0.00137068	0.00242568	0.0122362	0.00494925
K09691	9.48423e-32	6.52894e-28	0.630421	0.0141924	0.00518269	0.00124578	0.00246088	0.00798246	0.00391128
K09710	6.06085e-28	4.17229e-24	0.635984	0.0636098	0.00501153	0.0456764	0.00381118	0.0572833	0.00722911
K09712	7.09614e-28	4.88498e-24	0.66402	0.0117877	0.00403634	0.0329014	0.00836761	0.0148594	0.00661459
K09747	2.93986e-28	2.0238e-24	0.60626	0.060369	0.00565773	0.0435874	0.00382542	0.0539116	0.00663291
K09761	1.71229e-27	1.17874e-23	0.62838	0.0630739	0.00527382	0.0453242	0.0036254	0.0573113	0.00729099
K09769	3.69472e-24	2.54344e-20	0.506814	0.0178056	0.00516104	0.00504847	0.00534424	0.0114368	0.00477815
K09778	1.48538e-27	1.02253e-23	0.533518	0.0102134	0.0043841	0.00110917	0.00238077	0.00540139	0.0032786
K09786	4.5722e-27	3.1475e-23	0.610626	0.0191277	0.00393558	0.0350723	0.00699031	0.0233438	0.00467283
K09790	2.57194e-24	1.77052e-20	0.567803	0.0212862	0.00425088	0.0357084	0.00679072	0.0252207	0.00443023
K09802	1.54053e-27	1.0605e-23	0.665148	0.0117718	0.00403312	0.0328012	0.0085441	0.0144719	0.00641277
K09810	2.87993e-26	1.98255e-22	0.520372	0.05909	0.00855967	0.0373183	0.00591929	0.0552989	0.0115863
K09815	4.99382e-22	3.43774e-18	0.553205	0.0381399	0.00694515	0.066464	0.0164846	0.0409087	0.00853313
K09816	8.6801e-20	5.97538e-16	0.503385	0.0381117	0.00689047	0.0649356	0.0172902	0.0418555	0.00830895
K09890	1.24069e-25	8.54093e-22	0.588305	0.0118914	0.00408586	0.0307472	0.00908283	0.0152239	0.00641064
K09891	6.26276e-27	4.31128e-23	0.606646	0.0147282	0.00424384	0.032865	0.00849898	0.0200401	0.00466511
K09893	7.28629e-27	5.01588e-23	0.645094	0.012642	0.00395367	0.0327854	0.0085417	0.0155798	0.00634621
K09894	3.9511e-27	2.71994e-23	0.649965	0.012418	0.0039826	0.0327773	0.00855109	0.0155176	0.00626495
K09896	1.53594e-27	1.05734e-23	0.664761	0.0117562	0.00402429	0.0327773	0.00855108	0.0144712	0.00641217
K09897	6.24061e-27	4.29604e-23	0.647088	0.0126449	0.00399497	0.0328321	0.00849956	0.0154834	0.00637451
K09898	4.00257e-26	2.75537e-22	0.587817	0.0158695	0.00420867	0.0330154	0.00834761	0.0211504	0.0044792
K09899	4.2347e-27	2.91517e-23	0.649839	0.0124061	0.00397695	0.0327773	0.00855109	0.0154698	0.00630024
K09900	1.58502e-27	1.09112e-23	0.660121	0.0117481	0.00403776	0.0327773	0.00855109	0.0148494	0.00646446
K09901	1.55144e-27	1.06801e-23	0.66398	0.0118356	0.00405374	0.0327773	0.00855108	0.0147857	0.00625676
K09902	9.00649e-22	6.20007e-18	0.519533	0.0187833	0.00414003	0.0332418	0.00823088	0.022729	0.0042283
K09903	1.18192e-27	8.13632e-24	0.630533	0.0639211	0.00505239	0.0458448	0.0040286	0.0575489	0.00734023
K09904	4.01774e-27	2.76581e-23	0.651224	0.0123588	0.00396355	0.0327773	0.00855109	0.0154085	0.00630234
K09906	2.42567e-24	1.66983e-20	0.558488	0.0164789	0.00423753	0.0329278	0.00850641	0.0211672	0.00473906
K09907	1.55975e-27	1.07373e-23	0.659866	0.0117854	0.00400564	0.0327773	0.00855109	0.0148578	0.00646894
K09908	4.17752e-26	2.8758e-22	0.585537	0.0157893	0.00415071	0.0329648	0.0083981	0.0213582	0.00450089
K09909	2.94024e-23	2.02406e-19	0.572312	0.0212423	0.00728005	0.0599348	0.0232251	0.0235893	0.010543
K09910	9.2015e-27	6.33431e-23	0.647133	0.0126527	0.00404351	0.0328321	0.00849956	0.0154577	0.00634873
K09911	1.46297e-27	1.00711e-23	0.665384	0.0117343	0.00402785	0.0327773	0.00855108	0.0144521	0.00640308
K09914	2.33878e-27	1.61001e-23	0.649492	0.0131835	0.00408101	0.0332299	0.00820439	0.0168641	0.00612612
K09915	1.78131e-26	1.22626e-22	0.632703	0.0147251	0.0040479	0.0332756	0.00808944	0.0170961	0.00594164
K09916	2.661e-24	1.83183e-20	0.55666	0.0170609	0.00441699	0.0331221	0.00827814	0.0217368	0.00446984
K09917	1.46297e-27	1.00711e-23	0.665384	0.0117343	0.00402785	0.0327773	0.00855108	0.0144521	0.00640308
K09918	1.52211e-27	1.04782e-23	0.641602	0.0133584	0.00399765	0.0328912	0.00837737	0.0173505	0.00562924
K09919	4.39161e-30	3.02319e-26	0.641084	0.0160296	0.00444328	0.00172255	0.0024348	0.0199498	0.00863546
K09923	7.9934e-27	5.50266e-23	0.630868	0.0119979	0.00395343	0.0317446	0.00846074	0.0147855	0.00669391
K09931	2.19701e-30	1.51242e-26	0.629247	0.019366	0.00596157	0.00109446	0.00188011	0.016585	0.00845217
K09933	7.0185e-26	4.83153e-22	0.592552	0.0248915	0.00543527	0.00934788	0.00801022	0.0290026	0.00729055
K09940	3.93775e-28	2.71075e-24	0.502598	0.0205844	0.00688786	0.00386315	0.00457472	0.0106046	0.00825963
K09948	1.01242e-27	6.96953e-24	0.596348	0.0102281	0.00287607	0.00115041	0.0019473	0.0105774	0.00504793
K09949	4.45298e-28	3.06543e-24	0.559563	0.0120289	0.00460442	0.00143851	0.00271231	0.00702127	0.00384164
K09966	1.64204e-28	1.13038e-24	0.573632	0.0131659	0.00513589	0.00133349	0.00254099	0.00863838	0.00435954
K09967	3.50148e-26	2.41042e-22	0.520751	0.0172067	0.00713013	0.00244403	0.0040296	0.0119351	0.00582217
K09969	3.48669e-22	2.40024e-18	0.50271	0.0194319	0.00405829	0.0336794	0.00793423	0.0241083	0.00489872
K09970	1.31197e-22	9.03161e-19	0.521528	0.0187869	0.00385785	0.033456	0.00812059	0.0231006	0.00475996
K09971	1.48198e-22	1.02019e-18	0.519908	0.018832	0.00385687	0.033456	0.00812059	0.0231769	0.00474756
K09986	5.8586e-29	4.03306e-25	0.5882	0.0114004	0.00348672	0.0013544	0.00189922	0.0131153	0.00625779
K09989	1.39052e-27	9.57237e-24	0.569551	0.0103123	0.00345549	0.00139678	0.00214676	0.0111666	0.0051564
K09992	3.29462e-27	2.26802e-23	0.543367	0.0130766	0.00528806	0.00172312	0.00276387	0.00652707	0.0042397
K10027	1.96227e-26	1.35082e-22	0.508909	0.0183122	0.00535972	0.00346638	0.00413672	0.01377	0.00790746
K10108	9.25776e-29	6.37304e-25	0.664307	0.012408	0.00403319	0.032938	0.00838119	0.0164823	0.00563652
K10109	1.63402e-28	1.12486e-24	0.668455	0.0122704	0.00400386	0.0329348	0.00837769	0.0159808	0.005747
K10110	1.74892e-28	1.20396e-24	0.668244	0.0122569	0.00399848	0.0329348	0.00837769	0.0159231	0.00579037
K10206	1.59961e-28	1.10117e-24	0.548636	0.00924339	0.00427442	0.000997622	0.00170774	0.00416521	0.00262064
K10678	3.27795e-26	2.25654e-22	0.609416	0.0148613	0.00451041	0.0330477	0.00837034	0.0189742	0.00503089
K10679	3.203e-20	2.20495e-16	0.509596	0.0213318	0.00708496	0.0545009	0.0225202	0.0238734	0.00993941
K10764	7.24795e-30	4.98949e-26	0.685525	0.0254323	0.00650503	0.0025816	0.00306907	0.0264234	0.0104989
K10773	4.56437e-28	3.14211e-24	0.641772	0.0668673	0.00605738	0.0459385	0.00419105	0.0595359	0.00824401
K10806	2.45297e-23	1.68862e-19	0.541648	0.0193297	0.00417656	0.0341483	0.00765858	0.0235502	0.00466136
K10914	1.1797e-22	8.12105e-19	0.566427	0.0176936	0.00374414	0.0332577	0.0082595	0.0199194	0.00505091
K10939	1.25612e-27	8.64715e-24	0.664202	0.0115656	0.00403811	0.0327078	0.00855297	0.014181	0.00658392
K10974	1.62941e-28	1.12168e-24	0.669552	0.012578	0.00426007	0.0333455	0.00797109	0.01566	0.00638285
K11069	1.13655e-19	7.82403e-16	0.530843	0.0442147	0.010195	0.092787	0.0328662	0.0448538	0.0138257
K11085	5.72384e-30	3.94029e-26	0.593526	0.0717585	0.012409	0.0400234	0.00515045	0.0610476	0.0129176
K11107	8.01944e-26	5.52058e-22	0.625996	0.0139653	0.00441792	0.0330453	0.00836249	0.0160778	0.00631749
K11175	2.49142e-27	1.71509e-23	0.621889	0.0636401	0.00509204	0.0457568	0.00421205	0.0572676	0.00730668
K11183	1.58556e-27	1.0915e-23	0.612819	0.0180767	0.00667571	0.041492	0.00593549	0.0265971	0.00963207
K11192	2.13237e-23	1.46793e-19	0.548307	0.0109117	0.00402792	0.0293504	0.0102186	0.0135968	0.00645313
K11203	1.95052e-26	1.34274e-22	0.623963	0.0230143	0.00810589	0.0623297	0.0177031	0.0281508	0.0128767
K11258	5.91943e-28	4.07493e-24	0.654757	0.012745	0.00395389	0.0328899	0.00848105	0.0168266	0.00556531
K11381	1.46761e-30	1.0103e-26	0.629708	0.0179441	0.00564596	0.00161616	0.00240333	0.012859	0.00648701
K11391	2.02713e-25	1.39548e-21	0.568241	0.0137829	0.00396929	0.0328298	0.00851852	0.0167395	0.00827721
K11392	1.49217e-27	1.02721e-23	0.65921	0.0118649	0.00406885	0.0327773	0.00855109	0.0152267	0.0062696
K11707	2.5958e-27	1.78695e-23	0.519949	0.0131044	0.00571988	0.00217527	0.00397053	0.00525592	0.00312567
K11708	4.30641e-28	2.96453e-24	0.527665	0.0128847	0.00560159	0.00195458	0.00383286	0.00525514	0.00312647
K11709	4.30641e-28	2.96453e-24	0.527665	0.0128847	0.00560159	0.00195458	0.00383286	0.00525514	0.00312647
K11710	7.18933e-29	4.94913e-25	0.55549	0.0149844	0.00632204	0.00210326	0.0039428	0.00612715	0.00365455
K11717	1.93e-22	1.32861e-18	0.547229	0.0485397	0.00660983	0.0220552	0.0151451	0.0445738	0.0079535
K11720	1.64882e-25	1.13504e-21	0.515785	0.05075	0.00504879	0.0443578	0.00562076	0.05753	0.00499382
K11747	6.41773e-25	4.41796e-21	0.585966	0.017499	0.00419521	0.0339964	0.0077772	0.0211638	0.0051924
K11748	3.50844e-27	2.41521e-23	0.656546	0.0127539	0.00392101	0.0329478	0.00840055	0.015296	0.00626756
K11749	5.31965e-27	3.66205e-23	0.590932	0.0576214	0.00522801	0.0422893	0.00390339	0.0543437	0.00673338
K11750	1.10797e-27	7.62728e-24	0.6636	0.0118853	0.00406229	0.032786	0.00853264	0.0147873	0.00627001
K11751	1.48097e-26	1.0195e-22	0.609346	0.0124201	0.0041272	0.0328603	0.0085602	0.0161452	0.00769438
K11752	2.0133e-28	1.38596e-24	0.663574	0.0627658	0.00578745	0.0432997	0.00331455	0.0573672	0.00741269
K11753	7.71851e-28	5.31342e-24	0.627908	0.0630987	0.0047775	0.0457736	0.0039642	0.0566493	0.00704895
K11754	1.45796e-27	1.00366e-23	0.616094	0.0644806	0.00501005	0.046667	0.00436066	0.0581131	0.00738533
K11782	3.4753e-27	2.3924e-23	0.511074	0.00600332	0.00251254	0.000573864	0.00103759	0.00366476	0.00253527
K11784	3.43393e-28	2.36391e-24	0.521786	0.00589181	0.00259188	0.000463059	0.000951471	0.00352884	0.00237088
K11923	3.86895e-27	2.66338e-23	0.657413	0.0122543	0.00400426	0.0328199	0.008574	0.0146538	0.00639293
K11925	1.46297e-27	1.00711e-23	0.665384	0.0117343	0.00402785	0.0327773	0.00855108	0.0144521	0.00640308
K11928	6.97979e-28	4.80489e-24	0.63959	0.02238	0.00474338	0.0414412	0.0081492	0.0230793	0.00643898
K11930	2.15403e-27	1.48284e-23	0.657317	0.0120693	0.00396397	0.0327886	0.00856168	0.0152429	0.00628056
K11933	8.49721e-26	5.84948e-22	0.597883	0.0112821	0.00399399	0.0305854	0.00924349	0.0144697	0.00642238
K12111	5.52827e-28	3.80566e-24	0.677584	0.0117392	0.00400112	0.0330524	0.00830595	0.014281	0.00651647
K12112	1.35672e-27	9.33963e-24	0.664899	0.0116871	0.00401733	0.0327655	0.0085472	0.0142775	0.00652086
K12113	1.35672e-27	9.33963e-24	0.664899	0.0116871	0.00401733	0.0327655	0.0085472	0.0142775	0.00652086
K12251	2.42983e-28	1.67269e-24	0.616979	0.0214534	0.00600773	0.00242975	0.00342951	0.0220661	0.010115
K12257	4.14062e-31	2.8504e-27	0.599185	0.0243611	0.00700851	0.00481466	0.00507981	0.0141009	0.00708956
K12264	1.60233e-27	1.10305e-23	0.663934	0.0117249	0.00401884	0.0327655	0.0085472	0.0144117	0.00648691
K12265	1.60233e-27	1.10305e-23	0.663934	0.0117249	0.00401884	0.0327655	0.0085472	0.0144117	0.00648691
K12266	8.3776e-22	5.76714e-18	0.531577	0.0205083	0.00697913	0.0546145	0.0222602	0.023259	0.00943513
K12339	2.84934e-25	1.96148e-21	0.588768	0.027387	0.00518128	0.0101959	0.00868979	0.0303792	0.00787127
K12506	1.2968e-25	8.92718e-22	0.526154	0.0131663	0.00504658	0.0023572	0.00334184	0.00789981	0.00388614
K12525	3.80674e-27	2.62056e-23	0.650477	0.0123978	0.00398047	0.0327773	0.00855109	0.0155273	0.00625307
K12573	6.28982e-26	4.32991e-22	0.564996	0.0579405	0.00546878	0.0426334	0.00427659	0.0558907	0.00744375
K12960	4.97765e-26	3.42662e-22	0.502258	0.00859076	0.00300838	0.00193961	0.00249466	0.0122535	0.00614872
K12961	2.94925e-26	2.03027e-22	0.625228	0.0134069	0.00395284	0.0328163	0.0085718	0.0163863	0.00635962
K13038	8.82019e-30	6.07182e-26	0.67503	0.0657301	0.00573239	0.0447513	0.00369722	0.0582987	0.00769333
K13053	6.85877e-28	4.72158e-24	0.647731	0.0131582	0.00412339	0.0329814	0.00830633	0.0172215	0.00566503
K13256	3.03151e-28	2.08689e-24	0.676188	0.0124802	0.00411841	0.033542	0.00783706	0.0152193	0.00674303
K13481	1.43293e-27	9.86429e-24	0.558746	0.00960841	0.00264294	0.0013214	0.00198498	0.0107731	0.00545916
K13482	3.27015e-25	2.25117e-21	0.539157	0.00841962	0.00237564	0.00132296	0.00198461	0.00807603	0.00412426
K13498	2.15918e-27	1.48638e-23	0.660195	0.0142094	0.00411207	0.0338425	0.00775676	0.0164794	0.00633977
K13542	4.47549e-25	3.08093e-21	0.518413	0.0159829	0.00595029	0.00366705	0.00435253	0.0074794	0.00432226
K13628	2.19408e-27	1.5104e-23	0.560026	0.0603932	0.00956661	0.039631	0.00522409	0.0521085	0.00705062
K13638	2.60893e-27	1.79599e-23	0.653648	0.0122485	0.00419932	0.0328416	0.00854469	0.0157773	0.00604884
K13639	2.44582e-24	1.68371e-20	0.566106	0.0152143	0.00363087	0.0317906	0.00856117	0.0180429	0.00574161
K13694	6.9483e-26	4.78321e-22	0.571797	0.0131911	0.00401653	0.0309401	0.00877272	0.0172003	0.00594851
K13766	1.53785e-29	1.05865e-25	0.652522	0.0234845	0.00573488	0.00260976	0.00344558	0.0207203	0.00936976
K13789	2.03908e-27	1.4037e-23	0.602156	0.0334075	0.00665994	0.00884521	0.00887381	0.0240391	0.00872802
K13990	7.9968e-30	5.505e-26	0.537476	0.00512475	0.00247373	0.000280442	0.000870434	0.00278179	0.00174018
K13993	1.86294e-28	1.28245e-24	0.660386	0.0401135	0.00946143	0.00768771	0.00708923	0.0361406	0.0131712
K14055	2.33429e-24	1.60692e-20	0.597332	0.0151902	0.00396746	0.0330249	0.0084471	0.0174372	0.00622865
K14155	2.15553e-29	1.48387e-25	0.719658	0.0397398	0.00744144	0.0736508	0.0104121	0.0415038	0.0107517
K14187	1.47144e-26	1.01294e-22	0.641784	0.0134709	0.00398153	0.0329591	0.00847392	0.017052	0.00560366
K14260	1.36769e-27	9.41519e-24	0.642359	0.0213558	0.00498073	0.0371018	0.00579187	0.0239249	0.00450021
K14441	2.05625e-29	1.41552e-25	0.705652	0.0399161	0.00770231	0.0115672	0.00937102	0.0365884	0.00715727
K14761	3.66621e-28	2.52382e-24	0.705046	0.0173805	0.00470322	0.0365602	0.00607301	0.0187064	0.00596511
K14762	1.65239e-27	1.13751e-23	0.659044	0.0116105	0.00405404	0.0327078	0.00855297	0.0146697	0.00658224
K15011	1.34771e-25	9.27762e-22	0.525802	0.00978454	0.00259214	0.0016396	0.00286174	0.0117285	0.00595589
K15012	1.12013e-25	7.71098e-22	0.529633	0.00984476	0.00259755	0.0016396	0.00286174	0.011808	0.0059539
K15461	6.07851e-22	4.18445e-18	0.528178	0.018905	0.0043762	0.0335313	0.00791551	0.0228732	0.0044405
K15536	5.54933e-23	3.82016e-19	0.542096	0.0111905	0.00403748	0.029426	0.0101899	0.0142766	0.00629471
K15545	2.40125e-28	1.65302e-24	0.66304	0.012253	0.00405678	0.0349692	0.00987952	0.0148795	0.00645807
K15580	2.19231e-28	1.50919e-24	0.654833	0.0460136	0.0107613	0.0781846	0.0120988	0.041659	0.0123682
K15581	8.83248e-29	6.08028e-25	0.663122	0.0286111	0.00500397	0.041808	0.00474291	0.0250003	0.00558799
K15582	4.64177e-29	3.1954e-25	0.65468	0.0292679	0.00492391	0.0417772	0.00465932	0.0252071	0.00565596
K15583	2.44972e-26	1.68639e-22	0.541214	0.0308924	0.00616717	0.042166	0.00584967	0.0267692	0.00591326
K15635	3.69701e-29	2.54502e-25	0.535923	0.00615264	0.00277146	0.000291275	0.000965786	0.00324184	0.00243088
K15723	4.4432e-27	3.0587e-23	0.649244	0.0124411	0.00398801	0.0327773	0.00855109	0.0154735	0.00629575
K15726	4.65115e-28	3.20185e-24	0.568432	0.0276253	0.00819923	0.00336528	0.00520833	0.0260081	0.0132884
K15727	5.78347e-28	3.98134e-24	0.569906	0.0231803	0.00705647	0.00270573	0.00437077	0.0210464	0.0107987
K15738	9.3002e-24	6.40226e-20	0.508323	0.0528323	0.00446337	0.0420538	0.00366955	0.0520325	0.00589648
K15773	1.03626e-26	7.13359e-23	0.632135	0.0118771	0.00406494	0.0316386	0.00863345	0.0142788	0.006542
K15778	1.99564e-30	1.3738e-26	0.638218	0.0148727	0.0042129	0.0015021	0.0023189	0.0191405	0.00838446
K15862	2.33509e-32	1.60748e-28	0.537496	0.016465	0.0064769	0.00126558	0.00257144	0.00902245	0.00693665
K15987	4.35078e-31	2.99508e-27	0.675403	0.0331955	0.00948231	0.00402523	0.00466993	0.0240334	0.00983166
K16011	1.96026e-30	1.34944e-26	0.618095	0.0102362	0.00299578	0.00133096	0.00184214	0.0144702	0.00646803
K16012	9.16054e-30	6.30612e-26	0.686812	0.0210777	0.00526672	0.0382281	0.00458369	0.0244164	0.00503746
K16013	6.8616e-30	4.72352e-26	0.691638	0.0207897	0.00529569	0.0382126	0.00463557	0.0242198	0.00501622
K16055	1.22318e-25	8.42034e-22	0.502439	0.00484582	0.00217373	0.000547521	0.00120335	0.00290363	0.00168249
K16091	7.49881e-32	5.16218e-28	0.56333	0.0128224	0.00480288	0.000703791	0.00157224	0.00892583	0.00565596
K16136	4.42949e-27	3.04926e-23	0.639164	0.0113675	0.00404064	0.0315424	0.00867426	0.013994	0.00654114
K16211	2.87186e-28	1.97699e-24	0.502515	0.0121456	0.00450519	0.00175459	0.00262639	0.00775996	0.00502656
K16264	1.03322e-20	7.11267e-17	0.502951	0.0401552	0.00574146	0.0182007	0.0136669	0.0385252	0.00861498
K16345	9.28508e-26	6.39185e-22	0.59201	0.0171103	0.00678621	0.0408896	0.00602484	0.02339	0.0109877
K16363	2.95526e-33	2.0344e-29	0.584164	0.019265	0.00693874	0.00150665	0.00279683	0.0102785	0.00729849
K16692	1.71259e-26	1.17895e-22	0.602708	0.0194566	0.00681305	0.0434025	0.0070515	0.0256004	0.0101288
K16785	1.27397e-26	8.76998e-23	0.586257	0.0264184	0.00913819	0.0489566	0.0106368	0.0221321	0.00971585
K16787	4.45034e-26	3.06362e-22	0.51852	0.0276645	0.0119473	0.0500724	0.0127835	0.0225511	0.0095443
K16872	5.6151e-28	3.86543e-24	0.518993	0.00763209	0.00313354	0.000944359	0.00174534	0.00990485	0.00514098
K16924	1.05489e-20	7.26185e-17	0.534667	0.00826738	0.00399791	0.0267955	0.0129162	0.00716103	0.00545866
K17103	9.67264e-30	6.65864e-26	0.738678	0.0413119	0.00879502	0.00590955	0.00591642	0.0378583	0.0122451
K17218	1.85929e-29	1.27993e-25	0.622502	0.0207812	0.00632905	0.00198229	0.00245988	0.0246638	0.0112801
K17226	8.49537e-29	5.84821e-25	0.592675	0.00858973	0.00324706	0.000786124	0.00140227	0.0101552	0.00461219
K17227	5.83379e-27	4.01598e-23	0.506556	0.0047352	0.0019078	0.00036995	0.000991961	0.0041672	0.00245847
K17321	1.17313e-28	8.07586e-25	0.508557	0.00599655	0.00180003	0.000489992	0.0011248	0.0082114	0.00501464
K17322	1.68532e-28	1.16018e-24	0.530461	0.00590948	0.001772	0.000486752	0.00112523	0.00769399	0.00444984
K17323	1.68532e-28	1.16018e-24	0.530461	0.00590948	0.001772	0.000486752	0.00112523	0.00769399	0.00444984
K17324	1.89587e-28	1.30512e-24	0.529667	0.00583779	0.00176996	0.000486752	0.00112523	0.00764352	0.00441402
K17325	1.89587e-28	1.30512e-24	0.529667	0.00583779	0.00176996	0.000486752	0.00112523	0.00764352	0.00441402
K17686	6.58565e-24	4.53356e-20	0.519062	0.0739536	0.00831234	0.0490405	0.00900462	0.0697532	0.0130861
K17759	2.77584e-24	1.91089e-20	0.547044	0.0374616	0.00784703	0.0159944	0.0109051	0.0381661	0.0089567
K18285	1.89779e-27	1.30644e-23	0.511524	0.00606127	0.0025615	0.000573864	0.00103759	0.00369985	0.00254072
K18446	3.76154e-27	2.58944e-23	0.655319	0.0124421	0.00399741	0.0327773	0.00855108	0.0151375	0.00616084
K18657	1.89884e-27	1.30716e-23	0.655084	0.012046	0.00405876	0.0327773	0.00855109	0.0153586	0.00629262
K18661	1.17742e-25	8.10537e-22	0.514868	0.00647442	0.00238262	0.000675301	0.00149334	0.0061523	0.00340033
K18707	2.22218e-30	1.52975e-26	0.628772	0.0264116	0.00649195	0.0051906	0.00535024	0.0188233	0.0078994
K18765	1.58502e-27	1.09112e-23	0.659798	0.0117634	0.00402449	0.0327773	0.00855109	0.0148649	0.00647124
K18778	3.16889e-24	2.18146e-20	0.539275	0.0171494	0.00376518	0.0330485	0.00837494	0.0228888	0.00504885
K19000	7.7435e-26	5.33063e-22	0.60748	0.0132743	0.00375511	0.0317088	0.00865225	0.0167565	0.00581708
K19092	2.94017e-32	2.02401e-28	0.638747	0.0133965	0.00500432	0.000787897	0.00149753	0.00837977	0.00414992
K19226	4.10155e-27	2.82351e-23	0.649913	0.0124032	0.00397847	0.0327773	0.00855109	0.0154663	0.00629932
K19227	4.17201e-27	2.87201e-23	0.64957	0.0124175	0.00397401	0.0327773	0.00855109	0.0155259	0.00628427
K19228	3.9511e-27	2.71994e-23	0.649965	0.012418	0.0039826	0.0327773	0.00855109	0.0155176	0.00626495
K19229	3.9511e-27	2.71994e-23	0.649965	0.012418	0.0039826	0.0327773	0.00855109	0.0155176	0.00626495
K19230	4.2347e-27	2.91517e-23	0.649839	0.0124061	0.00397695	0.0327773	0.00855109	0.0154698	0.00630024
K19304	3.02485e-28	2.08231e-24	0.6318	0.0136921	0.00428996	0.0349293	0.00986385	0.0180424	0.00549006
K19334	7.78408e-26	5.35856e-22	0.601371	0.0111215	0.0040133	0.0305158	0.00926206	0.0138756	0.00653183
K19337	3.36724e-23	2.31801e-19	0.513603	0.0179231	0.00479072	0.0334827	0.00801988	0.0241651	0.00526134
K19577	5.16411e-29	3.55497e-25	0.683854	0.0190072	0.00545398	0.0380398	0.00559093	0.0223144	0.00574908
K19696	2.39922e-29	1.65163e-25	0.518243	0.0056028	0.00240248	0.000409904	0.00128768	0.00846253	0.00477923
K19745	2.10257e-23	1.44741e-19	0.577138	0.0185365	0.00385283	0.0340321	0.00766315	0.0213803	0.00502816
K19789	4.01798e-27	2.76598e-23	0.612799	0.014581	0.00432587	0.0329602	0.00842958	0.020096	0.00467686

## Sheet: S5. KEGG EC
KEGG EC	p-values	p-values (corrected)	Effect size	Gill: mean rel. freq. (%)	Gill: std. dev. (%)	Gut: mean rel. freq. (%)	Gut: std. dev. (%)	Skin: mean rel. freq. (%)	Skin: std. dev. (%)
EC:1.1.1.100	3.11755e-22	6.79314e-19	0.511473	0.401037	0.0422905	0.259951	0.0606571	0.356804	0.065355
EC:1.1.1.103	1.42208e-23	3.09871e-20	0.5874	0.040344	0.00768614	0.0783105	0.01896	0.0466102	0.0125832
EC:1.1.1.133	8.75516e-30	1.90775e-26	0.724647	0.101311	0.0202336	0.0163917	0.0167645	0.0873071	0.0290337
EC:1.1.1.157	1.26142e-23	2.74863e-20	0.501557	0.0809138	0.0129462	0.0290687	0.0288675	0.0636626	0.0192311
EC:1.1.1.193	8.60376e-27	1.87476e-23	0.613711	0.123403	0.00745397	0.0988281	0.0068659	0.11766	0.0100119
EC:1.1.1.22	1.23356e-24	2.68793e-21	0.521712	0.128394	0.0101304	0.101332	0.0097092	0.126823	0.0147148
EC:1.1.1.23	2.18736e-27	4.76626e-24	0.61457	0.121616	0.00649455	0.0991368	0.00555489	0.11414	0.00931393
EC:1.1.1.25	9.2162e-28	2.00821e-24	0.612202	0.138282	0.00746315	0.107871	0.00927638	0.126725	0.0122151
EC:1.1.1.290	1.25708e-25	2.73919e-22	0.580627	0.0354053	0.00920669	0.0757125	0.0205194	0.0479022	0.0102954
EC:1.1.1.3	2.28541e-19	4.97991e-16	0.515026	0.149445	0.00596443	0.178808	0.0193174	0.152832	0.00876974
EC:1.1.1.38	7.47941e-29	1.62976e-25	0.638233	0.055319	0.0127278	0.103638	0.0186831	0.0647934	0.0149261
EC:1.1.1.42	3.60914e-30	7.86432e-27	0.684062	0.130332	0.00993245	0.0985822	0.00619624	0.122533	0.0104804
EC:1.1.1.81	4.09167e-22	8.91576e-19	0.511591	0.049307	0.00909076	0.0226252	0.0199044	0.0614426	0.0165226
EC:1.1.1.85	4.62973e-27	1.00882e-23	0.565449	0.130787	0.0115701	0.102007	0.00688603	0.118975	0.0115233
EC:1.1.1.94	4.30714e-25	9.38526e-22	0.561344	0.127281	0.00719187	0.104172	0.00706447	0.119221	0.0103803
EC:1.1.1.95	3.55005e-29	7.73557e-26	0.553527	0.188724	0.0149161	0.128663	0.0232491	0.172644	0.0275682
EC:1.1.5.3	3.37667e-27	7.35777e-24	0.649877	0.175006	0.0283869	0.322809	0.0663607	0.19893	0.0391182
EC:1.11.1.15	1.55067e-26	3.37892e-23	0.607353	0.315629	0.0213235	0.242865	0.0272838	0.308231	0.0289634
EC:1.11.1.9	5.94508e-19	1.29543e-15	0.500636	0.0854592	0.0105797	0.0402584	0.0319354	0.0838608	0.0135199
EC:1.13.11.27	5.7763e-28	1.25866e-24	0.603352	0.0435017	0.00966744	0.00810144	0.00953793	0.0370118	0.0164107
EC:1.13.11.5	4.89415e-27	1.06644e-23	0.528424	0.0335921	0.00851562	0.00609351	0.0079891	0.0289663	0.0154546
EC:1.14.11.47	3.3123e-23	7.2175e-20	0.556734	0.0393286	0.00876432	0.0764334	0.0200834	0.0488303	0.010409
EC:1.14.12.17	3.21113e-29	6.99705e-26	0.717542	0.0400485	0.0114443	0.0864675	0.013199	0.046211	0.0136717
EC:1.14.19.3	1.28579e-27	2.80173e-24	0.507145	0.0303131	0.00809043	0.00524249	0.00638435	0.0236341	0.0145085
EC:1.16.1.3	2.34499e-28	5.10973e-25	0.664377	0.0253862	0.00879402	0.0798517	0.0240794	0.0329535	0.0147172
EC:1.16.3.1	1.08545e-24	2.3652e-21	0.571413	0.061119	0.0112549	0.0257516	0.0213117	0.0713399	0.0165899
EC:1.17.1.1	1.13375e-28	2.47044e-25	0.51702	0.0124957	0.00513729	0.00136961	0.00248693	0.0180139	0.00992547
EC:1.17.1.8	1.0137e-26	2.20885e-23	0.597144	0.130882	0.00897356	0.103547	0.00567255	0.121012	0.0117587
EC:1.17.4.2	1.67769e-29	3.65569e-26	0.731675	0.0345306	0.0120229	0.0861338	0.0140359	0.0407417	0.0151796
EC:1.2.1.10	7.52511e-30	1.63972e-26	0.747229	0.0348983	0.0106051	0.0861346	0.0140348	0.0409507	0.0145556
EC:1.2.1.38	1.17089e-27	2.55138e-24	0.615251	0.12261	0.00693991	0.0983429	0.00710113	0.115467	0.00955239
EC:1.2.1.71	5.04624e-28	1.09958e-24	0.622151	0.0320517	0.00928989	0.0762633	0.020093	0.0458297	0.0112793
EC:1.2.1.72	4.60292e-27	1.00298e-23	0.614294	0.031463	0.00915675	0.0754037	0.0206713	0.0427546	0.0117592
EC:1.2.4.4	1.98903e-28	4.33409e-25	0.591378	0.0821612	0.0181559	0.0201763	0.0208665	0.0654221	0.0249958
EC:1.21.98.1	2.43985e-27	5.31644e-24	0.510413	0.011389	0.00489592	0.00104505	0.00216931	0.00711054	0.00467585
EC:1.3.1.10	6.3716e-27	1.38837e-23	0.649452	0.0919451	0.0121972	0.0364726	0.0281446	0.0957179	0.0156892
EC:1.3.1.9	1.73972e-28	3.79084e-25	0.629484	0.169767	0.0181461	0.11065	0.0148173	0.152865	0.0226997
EC:1.3.5.1	2.09657e-28	4.56843e-25	0.614091	0.25258	0.017667	0.197756	0.0133222	0.234099	0.0215199
EC:1.3.5.3	4.48327e-28	9.76904e-25	0.603376	0.0262035	0.00829053	0.0760119	0.0204006	0.0368924	0.0200409
EC:1.3.8.1	1.91428e-25	4.17122e-22	0.54757	0.0232206	0.00676779	0.00473438	0.00535471	0.0194654	0.00890221
EC:1.3.8.4	7.84557e-28	1.70955e-24	0.578003	0.0218879	0.0069507	0.0032655	0.00475138	0.0251559	0.0113017
EC:1.3.8.6	5.70178e-25	1.24242e-21	0.521089	0.0631755	0.0174679	0.016874	0.0186467	0.0481096	0.0188192
EC:1.3.99.16	6.98953e-27	1.52302e-23	0.566172	0.0828865	0.0272361	0.0122666	0.0175148	0.07525	0.0345634
EC:1.4.1.3	7.21016e-30	1.57109e-26	0.648723	0.0359605	0.0101421	0.00508262	0.00592373	0.02467	0.0109381
EC:1.4.4.2	8.54399e-25	1.86174e-21	0.54907	0.142034	0.010666	0.107596	0.0131665	0.13396	0.0153083
EC:1.4.7.1	8.57362e-31	1.86819e-27	0.62394	0.0277169	0.0102234	0.00346522	0.00496411	0.0140982	0.00679482
EC:1.5.1.2	2.57425e-28	5.60928e-25	0.639799	0.133067	0.00851946	0.10435	0.00713155	0.12341	0.0105382
EC:1.5.1.33	7.03823e-31	1.53363e-27	0.544367	0.0127043	0.00578718	0.000705591	0.00160944	0.017175	0.00907847
EC:1.5.1.34	1.39435e-22	3.03829e-19	0.539535	0.0419126	0.0147124	0.124799	0.0536881	0.0493855	0.0222141
EC:1.5.1.41	2.34499e-28	5.10973e-25	0.664377	0.0253862	0.00879402	0.0798517	0.0240794	0.0329535	0.0147172
EC:1.5.1.5	4.05653e-26	8.83917e-23	0.579082	0.12735	0.0066645	0.104565	0.00665516	0.118231	0.00986853
EC:1.5.1.7	8.67869e-27	1.89109e-23	0.534659	0.0214	0.00802572	0.00317269	0.00671892	0.0136716	0.00584575
EC:1.6.5.3	3.02758e-24	6.59709e-21	0.59676	0.754811	0.111054	0.317268	0.245158	0.794529	0.148935
EC:1.7.1.7	2.65887e-28	5.79368e-25	0.701839	0.0364259	0.00958233	0.0824251	0.0163233	0.0357665	0.0155438
EC:1.7.2.2	2.49658e-25	5.44005e-22	0.53025	0.0246356	0.00849869	0.0701038	0.0223831	0.0325992	0.0212755
EC:1.7.2.3	4.61797e-27	1.00626e-23	0.639873	0.063784	0.0228157	0.214537	0.0770223	0.0772553	0.0370299
EC:1.7.99.1	6.24286e-27	1.36032e-23	0.658775	0.0308469	0.00849558	0.0778263	0.0198486	0.0378446	0.0138913
EC:1.9.3.1	3.44557e-26	7.50789e-23	0.586624	0.418096	0.0665508	0.217576	0.0543239	0.357601	0.0845555
EC:1.97.1.4	1.30032e-29	2.8334e-26	0.723732	0.119012	0.033047	0.267638	0.034824	0.143108	0.0493607
EC:2.1.1.13	2.78606e-27	6.07084e-24	0.594947	0.14529	0.0187085	0.0947057	0.0115561	0.139206	0.0229912
EC:2.1.1.14	1.23163e-26	2.68373e-23	0.539942	0.0629608	0.0145118	0.0961921	0.0097472	0.0760502	0.0127476
EC:2.1.1.163	8.88027e-26	1.93501e-22	0.593368	0.122814	0.008219	0.0986021	0.00597587	0.119813	0.0113643
EC:2.1.1.172	1.14573e-27	2.49655e-24	0.626745	0.0640901	0.0154718	0.147087	0.0423689	0.0778705	0.0178892
EC:2.1.1.174	2.67368e-26	5.82594e-23	0.610976	0.0271147	0.0086605	0.0749864	0.0210247	0.0346992	0.0177186
EC:2.1.1.178	5.59351e-28	1.21883e-24	0.673087	0.023412	0.00886167	0.074876	0.0211166	0.0317191	0.0144943
EC:2.1.1.182	9.40429e-26	2.04919e-22	0.570055	0.124433	0.00591085	0.103656	0.00618505	0.116898	0.00943792
EC:2.1.1.185	3.23231e-23	7.0432e-20	0.500346	0.122908	0.0071428	0.103781	0.00642598	0.116302	0.00955784
EC:2.1.1.186	4.14134e-28	9.02398e-25	0.633321	0.0308268	0.00901903	0.0757171	0.0203457	0.042994	0.0111755
EC:2.1.1.187	1.06933e-27	2.33007e-24	0.677935	0.03937	0.0116186	0.0849636	0.014416	0.0448812	0.0153418
EC:2.1.1.192	3.28301e-28	7.15368e-25	0.602614	0.133631	0.0117499	0.102841	0.00725122	0.120038	0.0108004
EC:2.1.1.193	4.15437e-25	9.05238e-22	0.55754	0.122718	0.00636041	0.102579	0.00577462	0.116449	0.00949033
EC:2.1.1.198	2.82278e-27	6.15083e-24	0.539676	0.143615	0.0122728	0.106207	0.00819677	0.132701	0.0198173
EC:2.1.1.199	1.58649e-26	3.45695e-23	0.586742	0.124304	0.00571894	0.103573	0.00593839	0.116737	0.00909709
EC:2.1.1.201	8.88027e-26	1.93501e-22	0.593368	0.122814	0.008219	0.0986021	0.00597587	0.119813	0.0113643
EC:2.1.1.217	5.2474e-20	1.14341e-16	0.507842	0.0215182	0.0101038	0.0619181	0.0295288	0.0190917	0.0123305
EC:2.1.1.228	2.49747e-25	5.44199e-22	0.563818	0.124292	0.00589578	0.103721	0.00606444	0.116918	0.00957852
EC:2.1.1.297	1.59231e-24	3.46965e-21	0.545666	0.129323	0.00651961	0.105878	0.00855182	0.120766	0.0106334
EC:2.1.1.35	8.87148e-24	1.93309e-20	0.590003	0.0420435	0.00934805	0.0797217	0.0182698	0.0461557	0.0129315
EC:2.1.1.61	1.27755e-24	2.78377e-21	0.580933	0.0371131	0.00949983	0.0765342	0.0197368	0.047107	0.0110536
EC:2.1.2.1	3.83081e-26	8.34733e-23	0.615066	0.133686	0.00694871	0.10594	0.00761801	0.128136	0.012483
EC:2.1.2.10	4.06825e-26	8.86473e-23	0.610953	0.130141	0.00922871	0.0990413	0.00741961	0.124196	0.0140341
EC:2.1.2.11	4.68717e-25	1.02133e-21	0.552732	0.119641	0.00792896	0.0963002	0.00845562	0.114382	0.0101566
EC:2.1.2.3	1.41676e-25	3.08713e-22	0.570266	0.124708	0.00605227	0.103614	0.00616808	0.117244	0.00963987
EC:2.1.2.9	3.73707e-29	8.14307e-26	0.632674	0.136824	0.00947968	0.105119	0.00777452	0.123149	0.0116631
EC:2.1.3.2	1.88422e-25	4.10571e-22	0.573423	0.12492	0.0059728	0.103731	0.00591648	0.117673	0.00984079
EC:2.2.1.9	3.77706e-31	8.23021e-28	0.637305	0.0694278	0.00750843	0.0973488	0.0125884	0.0583933	0.0154439
EC:2.3.1.128	7.32152e-23	1.59536e-19	0.549609	0.204438	0.0266365	0.310522	0.0711089	0.196258	0.0303175
EC:2.3.1.193	2.12172e-26	4.62323e-23	0.611628	0.0310465	0.00892613	0.0749729	0.0211028	0.0415901	0.0117735
EC:2.3.1.207	8.95979e-28	1.95234e-24	0.527033	0.0148383	0.00603867	0.00209597	0.00386506	0.019905	0.00982797
EC:2.3.1.234	1.16386e-24	2.53605e-21	0.538952	0.125769	0.0061255	0.105021	0.00705742	0.117808	0.00975909
EC:2.3.1.243	1.60528e-27	3.49791e-24	0.664119	0.0244534	0.00897052	0.074876	0.0211166	0.0314346	0.0148776
EC:2.3.1.31	1.98522e-25	4.3258e-22	0.604112	0.0616584	0.0105566	0.0173194	0.0167968	0.055207	0.0185342
EC:2.3.1.35	2.27641e-25	4.96029e-22	0.615916	0.0688299	0.0108928	0.0209426	0.0183333	0.0626606	0.0193827
EC:2.3.1.39	9.85811e-27	2.14808e-23	0.600307	0.123656	0.00653543	0.102475	0.00622937	0.118434	0.00875994
EC:2.3.1.46	7.64743e-28	1.66638e-24	0.676858	0.0406588	0.00892318	0.0846434	0.0155137	0.0448813	0.0152568
EC:2.3.1.51	5.53948e-28	1.20705e-24	0.645584	0.185064	0.0163798	0.119584	0.0189769	0.17303	0.025946
EC:2.3.1.54	2.1848e-27	4.76069e-24	0.675018	0.0715773	0.0313392	0.198991	0.0246724	0.0979932	0.05128
EC:2.3.1.57	1.49225e-25	3.25161e-22	0.574932	0.0483637	0.0117994	0.0830749	0.0157318	0.0439698	0.0168271
EC:2.3.1.79	4.48289e-25	9.76822e-22	0.581215	0.0662341	0.0221176	0.19209	0.0769313	0.0693661	0.0321461
EC:2.3.1.9	2.05868e-20	4.48585e-17	0.51067	0.268769	0.0368233	0.126274	0.0877288	0.263503	0.0581218
EC:2.3.2.2	1.16317e-24	2.53455e-21	0.50455	0.12093	0.0125275	0.0975439	0.00985165	0.132004	0.0185619
EC:2.3.3.1	1.0274e-23	2.23871e-20	0.533646	0.137709	0.0100434	0.107233	0.0123521	0.128146	0.012769
EC:2.3.3.13	3.89519e-28	8.48762e-25	0.652218	0.157321	0.0161193	0.105323	0.00997335	0.140327	0.0192357
EC:2.3.3.9	1.32261e-29	2.88196e-26	0.644075	0.0856247	0.0151046	0.160776	0.031285	0.107028	0.0208112
EC:2.4.1.12	8.26713e-24	1.80141e-20	0.56772	0.0242446	0.00863681	0.068565	0.0242358	0.0314133	0.0139638
EC:2.4.1.129	3.82768e-30	8.34052e-27	0.639874	0.0565054	0.00948857	0.0970809	0.0179774	0.0642046	0.0103117
EC:2.4.1.227	1.02578e-24	2.23518e-21	0.551016	0.123878	0.00589067	0.103697	0.00636725	0.116514	0.00949038
EC:2.4.1.25	4.64022e-25	1.0111e-21	0.599806	0.0562486	0.0077399	0.0858834	0.0137055	0.056052	0.0118776
EC:2.4.1.83	8.8682e-29	1.93238e-25	0.605165	0.0803014	0.0196024	0.0202687	0.019272	0.0489708	0.0200113
EC:2.4.2.10	6.94925e-26	1.51424e-22	0.575398	0.125126	0.00611074	0.10371	0.00623839	0.117574	0.00964554
EC:2.4.2.14	1.75148e-25	3.81647e-22	0.569608	0.125085	0.00616608	0.103647	0.0062474	0.11784	0.00987911
EC:2.4.2.17	1.76211e-27	3.83963e-24	0.626454	0.121693	0.00649003	0.0985824	0.00587668	0.11538	0.00942917
EC:2.4.2.18	1.03373e-25	2.25249e-22	0.570928	0.121129	0.00777142	0.0984613	0.00595642	0.115477	0.0103801
EC:2.4.2.19	4.02064e-24	8.76098e-21	0.501462	0.116109	0.00830416	0.0933149	0.0102964	0.111184	0.0103002
EC:2.4.2.22	3.54762e-29	7.73027e-26	0.717574	0.0416226	0.00998365	0.0880213	0.0132898	0.0490011	0.01428
EC:2.4.2.28	1.29085e-28	2.81277e-25	0.603039	0.0278111	0.00905566	0.00379406	0.00577482	0.017047	0.00843236
EC:2.4.2.29	1.97178e-25	4.29652e-22	0.556187	0.123046	0.00688435	0.101238	0.00715764	0.115972	0.00969907
EC:2.4.2.4	1.68575e-27	3.67325e-24	0.672361	0.0419078	0.00979741	0.0827089	0.015782	0.049093	0.0106388
EC:2.4.2.44	2.56503e-29	5.58919e-26	0.530314	0.0108781	0.00460549	0.000912922	0.00284242	0.0170441	0.00925028
EC:2.4.99.17	6.40687e-26	1.39606e-22	0.557442	0.125433	0.0102975	0.0976226	0.00822076	0.120157	0.0128247
EC:2.5.1.19	6.45476e-26	1.40649e-22	0.592899	0.123829	0.0063464	0.102568	0.00471092	0.118048	0.00991585
EC:2.5.1.39	2.4886e-25	5.42266e-22	0.510112	0.122813	0.016975	0.0851709	0.0154538	0.114801	0.0147401
EC:2.5.1.46	1.67046e-30	3.63992e-27	0.535471	0.0282488	0.00858132	0.00295063	0.00469074	0.0200271	0.0135436
EC:2.5.1.48	9.97466e-30	2.17348e-26	0.70733	0.0640486	0.00975927	0.0967985	0.00996864	0.0568805	0.0132205
EC:2.5.1.49	9.80389e-29	2.13627e-25	0.693427	0.0901295	0.0136461	0.024203	0.0196289	0.0779705	0.0222312
EC:2.5.1.54	8.48571e-27	1.84904e-23	0.620843	0.178954	0.015108	0.258009	0.0382414	0.190539	0.0228417
EC:2.5.1.6	5.13637e-25	1.11921e-21	0.54557	0.125288	0.00596189	0.1047	0.00702085	0.117601	0.0095302
EC:2.5.1.74	3.79458e-26	8.26839e-23	0.516651	0.0809484	0.00780178	0.094216	0.0086466	0.0688339	0.0127999
EC:2.5.1.75	1.44777e-25	3.1547e-22	0.568053	0.125407	0.00629618	0.103924	0.00639536	0.117373	0.00968265
EC:2.5.1.78	8.8073e-23	1.91911e-19	0.507914	0.128326	0.00898331	0.103729	0.0105593	0.120669	0.010457
EC:2.6.1.1	4.41074e-28	9.611e-25	0.604528	0.154204	0.0232739	0.0944699	0.011193	0.141033	0.0242758
EC:2.6.1.11	7.95054e-24	1.73242e-20	0.511241	0.118902	0.00698839	0.0972964	0.00811095	0.116507	0.0121165
EC:2.6.1.2	5.09312e-29	1.10979e-25	0.689881	0.0419076	0.010777	0.0844486	0.014968	0.0492059	0.0109691
EC:2.6.1.42	2.6233e-31	5.71617e-28	0.651848	0.188531	0.0212919	0.110162	0.0104848	0.167673	0.0337044
EC:2.6.1.57	1.37947e-26	3.00586e-23	0.618509	0.0365504	0.00936788	0.0785226	0.0186344	0.0471311	0.0121367
EC:2.6.1.66	2.28931e-27	4.9884e-24	0.669158	0.0777246	0.0175578	0.160517	0.0347688	0.0874896	0.0222038
EC:2.6.1.83	1.22679e-27	2.67318e-24	0.541421	0.0178464	0.00791873	0.00221158	0.00376005	0.00837431	0.00516391
EC:2.6.1.85	4.08006e-21	8.89045e-18	0.571013	0.151686	0.0105815	0.184588	0.0181892	0.150905	0.0105497
EC:2.6.1.9	3.37309e-26	7.34996e-23	0.603422	0.16624	0.0129782	0.115158	0.0161814	0.163943	0.0252204
EC:2.7.1.15	7.58522e-29	1.65282e-25	0.670585	0.0640628	0.0118458	0.101329	0.012536	0.0605279	0.0140684
EC:2.7.1.19	2.84938e-25	6.2088e-22	0.524228	0.0368148	0.0091832	0.0755907	0.021063	0.0561043	0.0122178
EC:2.7.1.2	2.70735e-20	5.89932e-17	0.526173	0.111551	0.0148041	0.0486614	0.0386807	0.103006	0.0193508
EC:2.7.1.21	3.90035e-27	8.49887e-24	0.576081	0.0742882	0.00905047	0.0972009	0.00699585	0.0681634	0.0143778
EC:2.7.1.24	1.71119e-25	3.72868e-22	0.564215	0.123902	0.00577715	0.103521	0.00635222	0.116394	0.00927153
EC:2.7.1.26	2.81757e-25	6.13948e-22	0.543005	0.122808	0.00567777	0.103566	0.00623103	0.115124	0.00908737
EC:2.7.1.33	1.5984e-26	3.4829e-23	0.594412	0.131911	0.00746555	0.106165	0.00818231	0.122367	0.0101575
EC:2.7.1.35	7.43204e-27	1.61944e-23	0.644848	0.048203	0.0191408	0.112954	0.0130229	0.0564818	0.0281536
EC:2.7.1.40	2.73684e-21	5.96357e-18	0.53971	0.153669	0.00966186	0.181872	0.0179453	0.150917	0.00927012
EC:2.7.1.45	1.22706e-22	2.67377e-19	0.52199	0.0975163	0.0145205	0.154853	0.0461813	0.0792968	0.0228827
EC:2.7.1.48	1.73891e-27	3.78908e-24	0.570717	0.0701194	0.00931651	0.096533	0.0105024	0.0635546	0.0159103
EC:2.7.1.50	1.23354e-28	2.68789e-25	0.706744	0.0389268	0.0122844	0.0874964	0.0137946	0.0457432	0.0149195
EC:2.7.1.56	7.75195e-29	1.68915e-25	0.739537	0.0435941	0.0170409	0.0950195	0.00959331	0.0449404	0.0145877
EC:2.7.1.59	7.07688e-28	1.54205e-24	0.675109	0.0239246	0.00872276	0.0751111	0.021119	0.0305221	0.0147381
EC:2.7.1.6	5.34427e-32	1.16452e-28	0.652208	0.074624	0.0087503	0.0954733	0.00783373	0.0599161	0.0140848
EC:2.7.1.60	5.85977e-28	1.27684e-24	0.677569	0.0230631	0.0087946	0.0749122	0.0209808	0.0299766	0.0151379
EC:2.7.1.69	4.70328e-30	1.02485e-26	0.749214	0.347021	0.0983826	0.840781	0.139843	0.409961	0.135468
EC:2.7.1.73	6.22232e-25	1.35584e-21	0.599121	0.0393643	0.0147915	0.132061	0.0535494	0.0462897	0.022067
EC:2.7.2.3	4.98301e-26	1.0858e-22	0.576259	0.125109	0.00617033	0.103675	0.00613782	0.117288	0.0096153
EC:2.7.2.8	3.0751e-27	6.70064e-24	0.605627	0.122702	0.0069459	0.0983905	0.00764808	0.1156	0.0095978
EC:2.7.3.9	1.43593e-31	3.12889e-28	0.694017	0.108564	0.0140163	0.173796	0.0234245	0.122936	0.0167207
EC:2.7.4.1	1.4856e-22	3.23713e-19	0.518536	0.0951458	0.0114166	0.0458922	0.0302859	0.0890233	0.0168708
EC:2.7.4.14	2.9713e-23	6.47447e-20	0.507193	0.120717	0.00568542	0.103008	0.0059797	0.114432	0.00917574
EC:2.7.4.22	4.53715e-25	9.88644e-22	0.561364	0.124383	0.00590743	0.103723	0.00633481	0.116926	0.00955597
EC:2.7.4.3	6.8586e-30	1.49449e-26	0.655389	0.139313	0.0106673	0.104918	0.0073037	0.124642	0.0117661
EC:2.7.4.6	2.5705e-26	5.60113e-23	0.595408	0.12148	0.00744866	0.0990736	0.00590352	0.116132	0.00954119
EC:2.7.7.12	6.41345e-29	1.39749e-25	0.685359	0.0544328	0.00859732	0.0896633	0.0116967	0.0499322	0.0147133
EC:2.7.7.2	2.81757e-25	6.13948e-22	0.543005	0.122808	0.00567777	0.103566	0.00623103	0.115124	0.00908737
EC:2.7.7.24	5.61706e-29	1.22396e-25	0.688569	0.119148	0.0171177	0.0376804	0.0293786	0.111576	0.0255369
EC:2.7.7.3	2.39525e-26	5.21926e-23	0.580977	0.124085	0.00577823	0.103357	0.00597316	0.116227	0.00919294
EC:2.7.7.7	2.32508e-25	5.06636e-22	0.569586	1.20902	0.0540728	1.0209	0.049818	1.14589	0.0895918
EC:2.7.7.73	1.48705e-27	3.24029e-24	0.671538	0.025024	0.00856606	0.0755665	0.0208834	0.0318278	0.0148088
EC:2.7.7.75	1.29338e-26	2.81828e-23	0.640885	0.0285174	0.00866954	0.075574	0.0206382	0.0343542	0.0151208
EC:2.7.7.8	7.29928e-26	1.59051e-22	0.566156	0.124422	0.00591157	0.103311	0.00592178	0.116621	0.00997199
EC:2.7.8.33	2.18554e-30	4.7623e-27	0.739315	0.0527042	0.0116311	0.102396	0.0161799	0.047523	0.0155933
EC:2.7.8.41	4.53083e-26	9.87269e-23	0.586559	0.0400194	0.00858005	0.00961154	0.0102539	0.0306795	0.0124681
EC:2.7.9.1	4.68528e-29	1.02092e-25	0.63499	0.0452901	0.0104753	0.00968664	0.00979714	0.0306554	0.0124203
EC:2.8.1.1	1.05781e-29	2.30497e-26	0.648984	0.133527	0.0176137	0.207828	0.0274338	0.151274	0.02328
EC:2.8.1.7	2.80781e-22	6.11822e-19	0.529054	0.261147	0.019125	0.173052	0.0523492	0.238302	0.0245311
EC:2.8.1.8	4.34289e-26	9.46316e-23	0.584433	0.120287	0.00784037	0.0966507	0.00684981	0.115354	0.0103575
EC:2.8.3.5	2.89282e-28	6.30346e-25	0.583238	0.0927955	0.0176168	0.0222643	0.0219238	0.074563	0.032731
EC:2.8.4.3	1.39783e-25	3.04587e-22	0.57044	0.12048	0.00817359	0.0975965	0.00682926	0.115675	0.0100349
EC:2.8.4.4	8.6111e-28	1.87636e-24	0.683469	0.0775034	0.0130391	0.0258996	0.0208934	0.0743851	0.0128467
EC:2.8.4.5	8.36564e-30	1.82287e-26	0.626075	0.0511445	0.011274	0.0114953	0.0114898	0.037885	0.0147058
EC:3.1.1.17	1.11552e-25	2.43072e-22	0.509823	0.0298088	0.0109708	0.00508101	0.00726368	0.0186771	0.0107376
EC:3.1.1.29	1.6152e-24	3.51953e-21	0.536445	0.125768	0.00623362	0.105003	0.00741358	0.116932	0.00945061
EC:3.1.1.32	1.53031e-25	3.33455e-22	0.554265	0.0383656	0.0108249	0.0841263	0.0259428	0.0497235	0.0110033
EC:3.1.1.4	1.53031e-25	3.33455e-22	0.554265	0.0383656	0.0108249	0.0841263	0.0259428	0.0497235	0.0110033
EC:3.1.1.5	1.60786e-24	3.50353e-21	0.52435	0.100968	0.0152818	0.16798	0.038849	0.12479	0.0184781
EC:3.1.1.53	2.64477e-31	5.76296e-28	0.585203	0.049755	0.0229145	0.00458013	0.00951579	0.0186889	0.0115784
EC:3.1.11.1	6.93302e-25	1.5107e-21	0.576937	0.0366083	0.00883306	0.0761641	0.0202648	0.047602	0.0109097
EC:3.1.11.2	2.55158e-25	5.5599e-22	0.549073	0.149624	0.0112715	0.110127	0.0140401	0.151821	0.0236086
EC:3.1.13.1	6.12387e-27	1.33439e-23	0.629978	0.0301636	0.0092812	0.0760393	0.020502	0.0396222	0.0132924
EC:3.1.13.3	3.23732e-25	7.05413e-22	0.514348	0.0574311	0.0126615	0.018979	0.0178699	0.037736	0.0144593
EC:3.1.2.12	6.5743e-25	1.43254e-21	0.532587	0.0575874	0.0134254	0.0975116	0.0141938	0.0812661	0.0176348
EC:3.1.2.23	1.0067e-26	2.1936e-23	0.510599	0.0103993	0.00359445	0.000897171	0.00215568	0.0108168	0.00639956
EC:3.1.21.1	2.73386e-29	5.95709e-26	0.656545	0.026923	0.00883823	0.0801925	0.023736	0.0375688	0.01359
EC:3.1.21.2	5.62658e-29	1.22603e-25	0.716189	0.0446792	0.00981234	0.0875508	0.0125256	0.048352	0.0136577
EC:3.1.26.3	2.06327e-25	4.49585e-22	0.563123	0.124098	0.00594102	0.103299	0.00613594	0.116413	0.00968499
EC:3.1.3.11	1.07647e-26	2.34562e-23	0.611364	0.136979	0.00860387	0.17708	0.0205202	0.130689	0.0174221
EC:3.1.3.18	4.50632e-29	9.81928e-26	0.560941	0.157226	0.021044	0.102408	0.0125943	0.179636	0.0425184
EC:3.1.3.27	1.89493e-27	4.12905e-24	0.605274	0.0914932	0.0193549	0.17176	0.0313015	0.12432	0.0271152
EC:3.1.3.4	3.26143e-28	7.10666e-25	0.678831	0.0231623	0.00877425	0.0750623	0.0208599	0.030928	0.0148956
EC:3.1.3.6	4.1275e-28	8.99383e-25	0.689728	0.0395699	0.0116302	0.0866223	0.0166057	0.0428633	0.0142249
EC:3.1.3.81	3.26143e-28	7.10666e-25	0.678831	0.0231623	0.00877425	0.0750623	0.0208599	0.030928	0.0148956
EC:3.1.4.16	4.1275e-28	8.99383e-25	0.689728	0.0395699	0.0116302	0.0866223	0.0166057	0.0428633	0.0142249
EC:3.1.6.6	8.59391e-28	1.87261e-24	0.519338	0.0162878	0.00697947	0.00159533	0.00368098	0.00930176	0.00596763
EC:3.1.7.2	2.51892e-23	5.48872e-20	0.544917	0.0401745	0.00805011	0.0770688	0.0197586	0.050018	0.012214
EC:3.2.1.1	7.36012e-25	1.60377e-21	0.580048	0.0965911	0.0153574	0.158267	0.0332733	0.0907343	0.0258759
EC:3.2.1.10	1.63314e-23	3.5586e-20	0.595655	0.0216686	0.0106497	0.0681644	0.0278172	0.0191836	0.0122205
EC:3.2.1.14	1.58589e-25	3.45566e-22	0.613596	0.0483096	0.0157302	0.139593	0.050761	0.0515695	0.0235634
EC:3.2.1.22	1.40419e-23	3.05973e-20	0.526673	0.0571403	0.0129923	0.0854891	0.0152971	0.048207	0.0165087
EC:3.2.1.93	1.67618e-28	3.65239e-25	0.695583	0.0278833	0.0113599	0.0794749	0.017111	0.0327645	0.0166475
EC:3.2.2.9	3.06305e-27	6.67438e-24	0.658692	0.0664184	0.0182953	0.15319	0.0418431	0.0675339	0.0218917
EC:3.3.1.1	1.01426e-28	2.21006e-25	0.687708	0.0867187	0.0169561	0.0204866	0.0164548	0.0730549	0.0229379
EC:3.4.11.23	1.6919e-28	3.68665e-25	0.653072	0.0257537	0.00879411	0.0824981	0.026539	0.0334234	0.0148528
EC:3.4.11.4	5.5566e-25	1.21078e-21	0.613126	0.0892592	0.0209868	0.209886	0.0705631	0.0813838	0.0337802
EC:3.4.11.5	1.70533e-23	3.71591e-20	0.568436	0.0405457	0.00905513	0.0118153	0.0127883	0.0424615	0.0139743
EC:3.4.13.21	1.49562e-23	3.25895e-20	0.541073	0.0427048	0.00823303	0.0783625	0.0178588	0.0443376	0.0170385
EC:3.4.13.22	2.22031e-32	4.83805e-29	0.575588	0.0330859	0.0110556	0.00334714	0.00518904	0.0213105	0.0131124
EC:3.4.14.5	4.87482e-29	1.06222e-25	0.557614	0.0405841	0.0118716	0.00552946	0.00781208	0.0301624	0.0172148
EC:3.4.19.13	1.16317e-24	2.53455e-21	0.50455	0.12093	0.0125275	0.0975439	0.00985165	0.132004	0.0185619
EC:3.4.19.3	4.94743e-22	1.07804e-18	0.540806	0.025742	0.0112094	0.064283	0.0275847	0.0188884	0.0116896
EC:3.4.21.102	3.31171e-30	7.21621e-27	0.652259	0.189227	0.0250695	0.10201	0.0157055	0.170084	0.0360219
EC:3.4.21.53	3.22236e-26	7.02152e-23	0.57214	0.125549	0.0149136	0.0919878	0.0119469	0.131865	0.017648
EC:3.4.21.92	3.52557e-30	7.68222e-27	0.638151	0.162827	0.0122797	0.114944	0.0148061	0.138313	0.0163415
EC:3.4.23.36	1.76029e-26	3.83567e-23	0.584813	0.147384	0.012071	0.110009	0.00995482	0.135635	0.0161257
EC:3.4.23.43	2.16745e-25	4.72286e-22	0.577747	0.153261	0.0173583	0.240087	0.0467269	0.164397	0.0275552
EC:3.4.24.84	1.83257e-31	3.99317e-28	0.631722	0.0286799	0.0103774	0.00280537	0.00518946	0.0168935	0.00757896
EC:3.5.1.1	5.74285e-27	1.25137e-23	0.62951	0.118184	0.0133866	0.178765	0.0260635	0.123265	0.0213318
EC:3.5.1.105	6.04257e-28	1.31668e-24	0.653419	0.0299543	0.00875102	0.0838165	0.0256214	0.0333229	0.015113
EC:3.5.1.118	4.0162e-24	8.75131e-21	0.57729	0.043192	0.00969792	0.0841177	0.0216323	0.049701	0.0119478
EC:3.5.1.2	1.41868e-23	3.09129e-20	0.503266	0.0690148	0.01258	0.110759	0.0141438	0.0734558	0.0254748
EC:3.5.1.25	3.5851e-29	7.81194e-26	0.705926	0.0982356	0.0215173	0.235773	0.0601095	0.0974779	0.0345436
EC:3.5.1.26	4.51605e-30	9.84047e-27	0.603231	0.0233355	0.00860279	0.00242206	0.00390259	0.0140838	0.00721666
EC:3.5.1.42	3.41202e-24	7.43478e-21	0.503582	0.122038	0.0082535	0.10172	0.00605263	0.115508	0.010092
EC:3.5.1.53	2.68523e-28	5.85111e-25	0.63099	0.0415519	0.0109534	0.00535386	0.00743496	0.0443033	0.0190226
EC:3.5.1.96	2.17448e-28	4.7382e-25	0.619706	0.0309006	0.00944319	0.0753489	0.0206014	0.044968	0.0107755
EC:3.5.2.3	7.80136e-29	1.69992e-25	0.705133	0.177559	0.0165017	0.11083	0.0113706	0.170648	0.0262856
EC:3.5.3.23	1.55897e-28	3.397e-25	0.629811	0.0313475	0.00911143	0.0760851	0.0201115	0.0446055	0.0113519
EC:3.5.3.6	2.56368e-29	5.58626e-26	0.733721	0.0352702	0.0091365	0.0831217	0.0154902	0.0402837	0.013122
EC:3.5.4.1	4.01339e-28	8.74518e-25	0.672603	0.0379146	0.00985117	0.0808839	0.0166547	0.0451873	0.0116432
EC:3.5.4.10	1.2629e-25	2.75186e-22	0.571325	0.124753	0.00604374	0.103614	0.00616808	0.117244	0.00963987
EC:3.5.4.16	1.70166e-30	3.70792e-27	0.662929	0.149458	0.0160318	0.103614	0.00726606	0.13452	0.0152475
EC:3.5.4.19	4.25042e-28	9.26166e-25	0.64061	0.122752	0.00617158	0.0991651	0.00564673	0.115589	0.00945731
EC:3.5.4.26	1.0174e-26	2.21692e-23	0.607183	0.122092	0.00758765	0.0980968	0.00672333	0.116558	0.00982631
EC:3.5.4.28	4.39574e-26	9.57831e-23	0.508084	0.0166648	0.00569317	0.00427799	0.00543121	0.024664	0.0117798
EC:3.5.4.31	4.39574e-26	9.57831e-23	0.508084	0.0166648	0.00569317	0.00427799	0.00543121	0.024664	0.0117798
EC:3.5.4.4	1.92269e-27	4.18955e-24	0.609461	0.0616208	0.0100048	0.0984648	0.0176085	0.0613224	0.0130425
EC:3.5.4.5	5.1848e-27	1.12977e-23	0.524945	0.0834102	0.00778404	0.0983531	0.0065701	0.0741746	0.0127193
EC:3.5.4.9	4.05653e-26	8.83917e-23	0.579082	0.12735	0.0066645	0.104565	0.00665516	0.118231	0.00986853
EC:3.5.5.1	8.6444e-30	1.88361e-26	0.586877	0.0197834	0.00679201	0.00217701	0.00356543	0.0263057	0.0124519
EC:3.5.99.6	1.05896e-29	2.30748e-26	0.592233	0.0741777	0.01036	0.102182	0.0168104	0.0620857	0.013857
EC:3.6.1.22	6.48981e-26	1.41413e-22	0.61372	0.0520898	0.00981437	0.0853829	0.0139292	0.0580862	0.0101013
EC:3.6.1.23	4.91397e-21	1.07075e-17	0.538371	0.0884323	0.00993829	0.0435433	0.0297481	0.0906857	0.0151571
EC:3.6.1.25	1.36535e-27	2.97509e-24	0.669289	0.0245306	0.00874062	0.0748759	0.0211166	0.0315323	0.0143589
EC:3.6.1.45	1.12317e-26	2.44738e-23	0.617479	0.0260488	0.00897005	0.0751526	0.0211899	0.0350398	0.0174759
EC:3.6.1.66	1.18979e-30	2.59256e-27	0.610432	0.163096	0.0149926	0.112156	0.0132774	0.140952	0.0202471
EC:3.6.1.7	5.31418e-25	1.15796e-21	0.506125	0.0671027	0.0104372	0.0925808	0.00973635	0.0775453	0.0105108
EC:3.6.3.31	4.53261e-26	9.87656e-23	0.571236	0.0565133	0.0108947	0.0897231	0.0118788	0.064675	0.0134473
EC:3.6.3.32	5.23124e-21	1.13989e-17	0.525136	0.0645659	0.0161288	0.136254	0.0465791	0.0725873	0.0190364
EC:3.6.3.34	1.26798e-30	2.76293e-27	0.745926	0.2739	0.0406159	0.449724	0.0495251	0.301296	0.043724
EC:3.7.1.2	6.99269e-28	1.52371e-24	0.588261	0.0416202	0.00987328	0.00750486	0.00933805	0.0350939	0.0161679
EC:4.1.1.11	2.88874e-26	6.29457e-23	0.641377	0.0885392	0.0110527	0.0350506	0.0261468	0.0845608	0.0135985
EC:4.1.1.15	1.59428e-28	3.47393e-25	0.681272	0.0641577	0.0224176	0.168628	0.0311312	0.085649	0.036257
EC:4.1.1.20	9.54592e-27	2.08006e-23	0.615861	0.136035	0.00730888	0.106153	0.00811785	0.126191	0.012715
EC:4.1.1.23	1.62901e-25	3.54961e-22	0.564519	0.12446	0.00588103	0.103726	0.00638948	0.11673	0.00945313
EC:4.1.1.36	4.43587e-27	9.66576e-24	0.609492	0.12833	0.00710768	0.103616	0.00599389	0.119026	0.0103677
EC:4.1.1.48	2.62283e-24	5.71515e-21	0.521236	0.120199	0.00867442	0.0995049	0.00558384	0.114884	0.0100169
EC:4.1.2.14	2.6868e-20	5.85454e-17	0.520811	0.0944709	0.0132286	0.156306	0.0448725	0.0904716	0.0181615
EC:4.1.3.27	5.31098e-26	1.15726e-22	0.558534	0.246124	0.0184057	0.193601	0.0150284	0.234131	0.0245326
EC:4.1.3.3	4.11145e-28	8.95885e-25	0.686271	0.0266849	0.00914489	0.0773763	0.0196767	0.0322485	0.0151013
EC:4.1.3.36	1.40315e-29	3.05747e-26	0.616677	0.0687432	0.00743581	0.092939	0.00925792	0.0584983	0.0155229
EC:4.1.3.4	7.53538e-27	1.64196e-23	0.638372	0.0597186	0.0124379	0.0140819	0.0141929	0.0539013	0.0181089
EC:4.1.3.42	2.45981e-20	5.35993e-17	0.52128	0.0944597	0.0132339	0.156306	0.0448725	0.0903564	0.0181764
EC:4.1.99.19	1.1913e-23	2.59585e-20	0.567773	0.0374166	0.00865415	0.0780841	0.0197648	0.0394825	0.0179442
EC:4.1.99.3	2.95979e-29	6.44938e-26	0.627231	0.144127	0.018529	0.0916608	0.0119675	0.124023	0.0181007
EC:4.2.1.10	5.96949e-28	1.30075e-24	0.630715	0.125126	0.00629741	0.102837	0.0050256	0.118272	0.00912678
EC:4.2.1.113	3.70545e-30	8.07418e-27	0.749541	0.0488042	0.00991718	0.0920579	0.0104714	0.0434007	0.0160539
EC:4.2.1.126	7.19284e-26	1.56732e-22	0.574889	0.0588611	0.00830202	0.087463	0.0124022	0.0547719	0.0154435
EC:4.2.1.18	3.8744e-29	8.44232e-26	0.6614	0.0461469	0.0101085	0.00612085	0.00797791	0.0419162	0.0177241
EC:4.2.1.19	1.1076e-26	2.41347e-23	0.595363	0.119975	0.00628045	0.0990344	0.00562184	0.113347	0.00896812
EC:4.2.1.20	4.4046e-26	9.59763e-23	0.599078	0.253192	0.0145905	0.203838	0.0128785	0.241531	0.0220681
EC:4.2.1.33	3.7445e-23	8.15926e-20	0.520091	0.245426	0.016241	0.201855	0.0117757	0.236074	0.0232519
EC:4.2.1.35	3.36145e-23	7.32461e-20	0.521412	0.245384	0.0162309	0.201725	0.0118041	0.236041	0.0232288
EC:4.2.1.46	5.08806e-28	1.10869e-24	0.646407	0.12657	0.0186702	0.0487136	0.0340175	0.112745	0.0192646
EC:4.2.1.47	1.20713e-24	2.63034e-21	0.591903	0.0686777	0.013603	0.0251117	0.0206883	0.0602033	0.0109109
EC:4.2.1.75	5.62571e-27	1.22584e-23	0.601826	0.136971	0.00940131	0.105746	0.0109289	0.128497	0.0114334
EC:4.2.1.9	3.28847e-24	7.16558e-21	0.530586	0.137	0.00997206	0.105696	0.00805079	0.137356	0.0200595
EC:4.2.1.96	1.46778e-29	3.1983e-26	0.72061	0.0752915	0.0157564	0.0118097	0.0117363	0.0657256	0.0223065
EC:4.2.3.3	2.8585e-27	6.22867e-24	0.632988	0.0432737	0.011064	0.0833035	0.0157777	0.0514193	0.0119058
EC:4.2.3.4	2.7892e-28	6.07768e-25	0.611209	0.134419	0.0104081	0.104748	0.00678919	0.121386	0.0109646
EC:4.2.3.5	8.01139e-27	1.74568e-23	0.60303	0.124044	0.00625101	0.102596	0.00487952	0.116948	0.00946259
EC:4.2.99.20	2.93233e-28	6.38954e-25	0.692952	0.0426488	0.00903797	0.0836119	0.0149839	0.0404724	0.0145084
EC:4.3.1.1	7.57982e-29	1.65164e-25	0.702082	0.0347619	0.0101693	0.0837539	0.0154786	0.0408128	0.0158711
EC:4.3.1.17	6.53737e-26	1.42449e-22	0.632627	0.132126	0.0166493	0.199028	0.018285	0.137311	0.0308842
EC:4.3.2.1	5.02734e-28	1.09546e-24	0.62891	0.124589	0.00664786	0.102015	0.00539236	0.117625	0.00895363
EC:4.3.2.2	6.32247e-26	1.37767e-22	0.578056	0.124442	0.0057901	0.103524	0.00603367	0.116903	0.00944933
EC:4.3.99.3	5.58981e-24	1.21802e-20	0.566235	0.0479541	0.00842211	0.0825675	0.0168482	0.055351	0.0121887
EC:4.4.1.21	6.14804e-30	1.33966e-26	0.740866	0.0353661	0.0125029	0.0880442	0.0128619	0.042324	0.015494
EC:4.4.1.8	1.16269e-29	2.53351e-26	0.719859	0.152095	0.0209865	0.257923	0.0351755	0.165936	0.0293993
EC:5.1.1.7	9.31247e-25	2.02919e-21	0.516485	0.117046	0.00814676	0.0966223	0.00766857	0.112457	0.0092468
EC:5.1.2.3	1.92336e-23	4.19101e-20	0.552255	0.0863889	0.0153227	0.155404	0.0384428	0.104993	0.0186095
EC:5.1.3.1	9.69075e-25	2.11161e-21	0.526973	0.12811	0.00810944	0.105337	0.00860527	0.118585	0.0095043
EC:5.1.3.15	1.95919e-23	4.26907e-20	0.594501	0.0399122	0.00959957	0.0780795	0.0191066	0.0445276	0.0114605
EC:5.1.3.9	1.79287e-29	3.90666e-26	0.742127	0.0279362	0.0111491	0.0821511	0.0160006	0.032369	0.015491
EC:5.1.99.1	2.80479e-28	6.11163e-25	0.601643	0.049993	0.0115989	0.0122345	0.0115181	0.038809	0.0148185
EC:5.3.1.1	3.6334e-23	7.91718e-20	0.533998	0.126964	0.00615343	0.105145	0.00868784	0.120105	0.00995287
EC:5.3.1.16	1.0279e-27	2.23978e-24	0.610636	0.123615	0.00844922	0.0967896	0.0079316	0.116622	0.0103506
EC:5.3.1.23	1.65647e-26	3.60944e-23	0.59635	0.0326939	0.00833503	0.00735545	0.00965263	0.0378903	0.0138669
EC:5.3.1.24	7.30428e-27	1.5916e-23	0.594536	0.126689	0.0071972	0.102554	0.00684851	0.118001	0.00999347
EC:5.3.1.9	7.71562e-27	1.68123e-23	0.621002	0.132889	0.0077065	0.104378	0.00655411	0.126899	0.0128513
EC:5.3.3.2	2.99749e-28	6.53152e-25	0.63946	0.0653721	0.0095754	0.0951493	0.00877513	0.059633	0.0152583
EC:5.3.3.8	1.24394e-25	2.71055e-22	0.584116	0.0352535	0.00939079	0.0757651	0.0203903	0.046941	0.0105704
EC:5.4.2.7	3.00934e-30	6.55736e-27	0.737306	0.0441279	0.0108071	0.0889896	0.011832	0.0514676	0.0122056
EC:5.4.99.12	1.0512e-29	2.29057e-26	0.553063	0.143921	0.0117958	0.106565	0.00926578	0.128229	0.0180632
EC:5.4.99.18	8.95577e-25	1.95146e-21	0.547561	0.123509	0.00615452	0.103333	0.00621144	0.116317	0.00956913
EC:5.4.99.19	5.14787e-25	1.12172e-21	0.586504	0.074141	0.0150966	0.150758	0.0405112	0.0786635	0.0268146
EC:5.4.99.2	2.34791e-25	5.1161e-22	0.527917	0.145891	0.0314937	0.0506106	0.0413341	0.117227	0.0387414
EC:5.4.99.22	1.83753e-25	4.00397e-22	0.556069	0.124388	0.0062679	0.1038	0.00617156	0.116734	0.00952813
EC:5.4.99.25	4.57903e-23	9.97771e-20	0.503185	0.121486	0.00602557	0.103512	0.00601932	0.115397	0.00937567
EC:5.4.99.5	2.68582e-22	5.85239e-19	0.570716	0.155441	0.00742478	0.188119	0.018636	0.157123	0.0102676
EC:5.4.99.62	1.23134e-28	2.6831e-25	0.719536	0.0278268	0.0108888	0.0811707	0.0170914	0.0323964	0.0161465
EC:5.99.1.3	1.12836e-26	2.45869e-23	0.570799	0.275776	0.0178904	0.217924	0.0199638	0.247102	0.0226703
EC:6.1.1.1	3.6784e-25	8.01524e-22	0.568704	0.125412	0.00602661	0.103978	0.00670153	0.118412	0.00975167
EC:6.1.1.10	4.02645e-25	8.77364e-22	0.556591	0.125266	0.00610589	0.104248	0.00668288	0.117326	0.00962994
EC:6.1.1.11	1.5815e-25	3.4461e-22	0.566472	0.12451	0.00591654	0.103844	0.00613557	0.117115	0.00951245
EC:6.1.1.12	4.87372e-28	1.06198e-24	0.5905	0.132538	0.00966122	0.104553	0.00642704	0.1201	0.0114382
EC:6.1.1.15	1.30099e-25	2.83485e-22	0.571417	0.12539	0.00617879	0.103943	0.00629067	0.117493	0.00968837
EC:6.1.1.16	9.55938e-26	2.08299e-22	0.575367	0.125186	0.00601501	0.104027	0.0059892	0.118153	0.00971876
EC:6.1.1.17	9.15101e-28	1.994e-24	0.6168	0.139957	0.0117715	0.0995983	0.0105775	0.128291	0.0164742
EC:6.1.1.19	1.89291e-25	4.12466e-22	0.564243	0.124786	0.0059074	0.103948	0.00642848	0.117022	0.00950766
EC:6.1.1.20	9.20877e-26	2.00659e-22	0.574499	0.248938	0.0117996	0.207173	0.0119529	0.234119	0.0190563
EC:6.1.1.3	1.39729e-25	3.0447e-22	0.567071	0.125417	0.00609334	0.10439	0.00685399	0.117878	0.00920961
EC:6.1.1.4	6.26528e-26	1.3652e-22	0.575715	0.124456	0.00591216	0.103636	0.00597775	0.116931	0.00940867
EC:6.1.1.5	1.36305e-25	2.97009e-22	0.566059	0.124742	0.00600609	0.103884	0.00639814	0.117084	0.00943675
EC:6.1.1.9	8.52598e-26	1.85781e-22	0.575035	0.124454	0.00590049	0.103588	0.00600413	0.117108	0.00948908
EC:6.2.1.26	1.38831e-29	3.02514e-26	0.615569	0.0682658	0.00752659	0.0925075	0.00925479	0.0578957	0.0156473
EC:6.2.1.30	1.1277e-24	2.45725e-21	0.564656	0.0514468	0.0114264	0.012239	0.0137263	0.0443333	0.0183779
EC:6.3.1.2	6.21498e-28	1.35424e-24	0.657694	0.220391	0.0217632	0.12742	0.0243924	0.206394	0.0384273
EC:6.3.1.5	5.88572e-25	1.2825e-21	0.523867	0.0722753	0.00925661	0.0958591	0.00969031	0.0664749	0.0158822
EC:6.3.2.1	9.55559e-25	2.08216e-21	0.534989	0.11973	0.0072238	0.0978421	0.00774331	0.11391	0.0102927
EC:6.3.2.10	9.11325e-26	1.98578e-22	0.569402	0.124825	0.00616639	0.103596	0.00614188	0.116702	0.00964099
EC:6.3.2.12	5.15207e-25	1.12264e-21	0.52158	0.125488	0.00599949	0.105561	0.0068752	0.118105	0.0098938
EC:6.3.2.17	5.15207e-25	1.12264e-21	0.52158	0.125488	0.00599949	0.105561	0.0068752	0.118105	0.0098938
EC:6.3.2.5	3.6334e-29	7.91718e-26	0.633366	0.13667	0.0108565	0.104295	0.0071283	0.121033	0.0113018
EC:6.3.2.6	7.01849e-27	1.52933e-23	0.585853	0.125913	0.00671636	0.10369	0.00613404	0.117516	0.00951332
EC:6.3.2.8	1.29749e-23	2.82723e-20	0.512549	0.124708	0.00676167	0.104437	0.00714945	0.11551	0.00970866
EC:6.3.2.9	1.14036e-24	2.48483e-21	0.540442	0.122629	0.00587548	0.103556	0.00606641	0.115942	0.0091442
EC:6.3.3.1	1.39293e-24	3.03518e-21	0.54856	0.124578	0.00593613	0.10405	0.00670759	0.117224	0.00964514
EC:6.3.4.13	7.74491e-24	1.68761e-20	0.528112	0.126841	0.00638402	0.105232	0.00795694	0.1181	0.0100957
EC:6.3.4.15	2.11796e-24	4.61505e-21	0.554847	0.126334	0.00631081	0.104368	0.00699336	0.118994	0.0103181
EC:6.3.4.19	1.75767e-22	3.82996e-19	0.517083	0.125511	0.00622403	0.104739	0.00821288	0.117481	0.00969732
EC:6.3.4.2	3.15562e-28	6.87609e-25	0.639911	0.12338	0.0061869	0.100709	0.00514996	0.116447	0.00909491
EC:6.3.4.5	8.11813e-27	1.76894e-23	0.617551	0.122885	0.00634581	0.101129	0.00467691	0.116191	0.00932828
EC:6.3.5.1	7.01512e-28	1.52859e-24	0.656657	0.0553736	0.0124663	0.00869191	0.00982581	0.05306	0.0212359
EC:6.3.5.2	2.05244e-22	4.47227e-19	0.502987	0.143095	0.0092152	0.111443	0.0121979	0.139958	0.0187459
EC:6.3.5.5	9.79423e-25	2.13416e-21	0.536811	0.252236	0.0118982	0.211991	0.0161944	0.241229	0.0180804
EC:6.3.5.6	4.8204e-25	1.05037e-21	0.582863	0.298511	0.0393542	0.137485	0.0536484	0.27109	0.0769266
EC:6.3.5.7	6.41156e-25	1.39708e-21	0.580786	0.300035	0.0394205	0.137859	0.0539082	0.274523	0.0789098
EC:6.4.1.4	9.77368e-26	2.12969e-22	0.526216	0.0477497	0.015629	0.011102	0.0123886	0.0541341	0.023507
EC:6.6.1.1	1.28387e-25	2.79755e-22	0.515736	0.0435678	0.0103891	0.0100765	0.0124679	0.032312	0.016385
EC:6.6.1.2	2.32721e-23	5.071e-20	0.521034	0.0372976	0.0103484	0.00877483	0.0109436	0.0375316	0.0162726

## Sheet: S6. MetaCyc Pathways
pathway	p-values	p-values (corrected)	Effect size	Gill: mean rel. freq. (%)	Gill: std. dev. (%)	Gut: mean rel. freq. (%)	Gut: std. dev. (%)	Skin: mean rel. freq. (%)	Skin: std. dev. (%)
ASPASN-PWY	3.59e-46	6.59e-45	0.637936	0.217338	0.0504675	0.435459	0.0864302	0.244589	0.0760914
AST-PWY	3.81e-42	4.27e-41	0.603841	0.129806	0.0372202	0.334872	0.105131	0.189759	0.0459312
BRANCHED-CHAIN-AA-SYN-PWY	1.24e-35	1.07e-34	0.541736	0.677682	0.0473068	0.540655	0.0315403	0.645728	0.0720552
DENITRIFICATION-PWY	3.3e-35	2.77e-34	0.537382	0.0361725	0.0128937	0.00406737	0.0102887	0.0391302	0.0190843
DTDPRHAMSYN-PWY	3.22e-53	1.09e-51	0.690705	0.451581	0.0722017	0.148148	0.0919475	0.404056	0.0987423
FERMENTATION-PWY	2.3e-40	2.38e-39	0.587746	0.434314	0.0354095	0.589049	0.0739304	0.456924	0.0545429
GLCMANNANAUT-PWY	8.04e-56	4.06e-54	0.708191	0.144398	0.0457795	0.418771	0.107762	0.165282	0.0732788
GLUCOSE1PMETAB-PWY	5.62e-38	5.4e-37	0.565144	0.233775	0.0402473	0.379945	0.0772205	0.254965	0.0443451
GLYCOCAT-PWY	2.57e-42	3.05e-41	0.605351	0.319249	0.0326931	0.434697	0.0381785	0.343154	0.0469992
HOMOSER-METSYN-PWY	9.9e-48	2.22e-46	0.650339	0.298955	0.0323622	0.417703	0.0494706	0.280738	0.0488818
HSERMETANA-PWY	1.29e-51	4.01e-50	0.679423	0.366404	0.040361	0.130079	0.091927	0.341762	0.0751529
ILEUSYN-PWY	1.36e-33	1.05e-32	0.52038	0.708865	0.0471322	0.571033	0.0326727	0.696715	0.0842861
LEU-DEG2-PWY	5.41e-51	1.56e-49	0.674931	0.223285	0.0476688	0.0363823	0.0435015	0.213587	0.0788464
MET-SAM-PWY	2.29e-46	4.4e-45	0.639514	0.396095	0.0331369	0.544856	0.0752553	0.385259	0.0467093
NADSYN-PWY	1.74e-45	2.93e-44	0.632339	0.116243	0.0384611	0.0126329	0.0214775	0.0762052	0.0341337
OANTIGEN-PWY	9.27e-61	1.25e-58	0.738689	0.403895	0.034289	0.149774	0.0935198	0.388648	0.0658081
P108-PWY	3.99e-44	5.56e-43	0.62099	0.367705	0.0652934	0.114704	0.0927274	0.303129	0.0886869
P161-PWY	1.19e-61	2.41e-59	0.743838	0.242783	0.0667005	0.597586	0.110894	0.284799	0.0938207
P441-PWY	2.07e-56	1.2e-54	0.712003	0.245098	0.0555295	0.509545	0.082913	0.262503	0.086281
POLYAMINSYN3-PWY	8.89e-39	8.98e-38	0.572859	0.120912	0.0259179	0.0322465	0.0422144	0.12505	0.039931
PPGPPMET-PWY	2.17e-36	1.91e-35	0.549439	0.280339	0.0408916	0.419019	0.0630267	0.32378	0.0499423
PWY-181	9.37e-38	8.6e-37	0.562981	0.258017	0.0344323	0.10505	0.0876149	0.258388	0.0567086
PWY-3781	1.78e-56	1.2e-54	0.712435	1.37111	0.12918	0.813301	0.170963	1.26895	0.155625
PWY-5101	3e-32	2.17e-31	0.505735	0.750771	0.0487419	0.611794	0.036915	0.736176	0.0854989
PWY-5345	1.26e-47	2.68e-46	0.649517	0.478776	0.0312644	0.248376	0.117972	0.45733	0.0509702
PWY-5347	4.65e-32	3.29e-31	0.50364	0.432752	0.0278797	0.538855	0.0793529	0.409303	0.0482529
PWY-5419	4.49e-43	5.5e-42	0.611976	0.0547139	0.0132496	0.00774945	0.01346	0.0430888	0.0195611
PWY-5420	6.54e-32	4.56e-31	0.501989	0.0387788	0.012752	0.0055392	0.0103933	0.0372425	0.0202266
PWY-5505	2.07e-53	7.61e-52	0.692028	0.269741	0.0515667	0.0566333	0.0573163	0.199436	0.0658009
PWY-5655	1.42e-43	1.86e-42	0.616281	0.0372562	0.0119692	0.00117563	0.00363425	0.0268277	0.0160818
PWY-5837	5.87e-60	5.93e-58	0.733964	0.227145	0.0354184	0.407241	0.058967	0.205518	0.0635172
PWY-5838	2.13e-40	2.26e-39	0.588056	0.32188	0.0269139	0.412337	0.0518282	0.286527	0.0495251
PWY-5861	8.51e-50	2.15e-48	0.66612	0.275488	0.0302863	0.404488	0.0579126	0.24197	0.055203
PWY-5897	3.2e-45	5.17e-44	0.63016	0.313299	0.0280434	0.415778	0.0500322	0.278129	0.0515913
PWY-5898	3.2e-45	4.79e-44	0.63016	0.313299	0.0280434	0.415778	0.0500322	0.278129	0.0515913
PWY-5899	3.2e-45	4.98e-44	0.63016	0.313299	0.0280434	0.415778	0.0500322	0.278129	0.0515913
PWY-6151	2.22e-50	5.97e-49	0.67045	0.282878	0.0537143	0.469308	0.0665931	0.301145	0.0543155
PWY-6263	1.7e-40	1.85e-39	0.588966	0.099744	0.0358975	0.010994	0.0202425	0.0573582	0.031529
PWY-6317	1.58e-54	6.4e-53	0.699622	0.34373	0.0348533	0.492125	0.0468835	0.302746	0.0703974
PWY-6609	3.48e-35	2.87e-34	0.537143	0.45051	0.0385608	0.588388	0.104341	0.407938	0.0551845
PWY-6737	8.45e-47	1.71e-45	0.642986	0.312497	0.0297143	0.431879	0.0433521	0.328396	0.0427448
PWY-6891	9.87e-46	1.73e-44	0.634362	0.175301	0.0445193	0.379616	0.0826043	0.208098	0.0698579
PWY-6906	1.82e-33	1.36e-32	0.519005	0.0962565	0.0414154	0.336159	0.176211	0.0934911	0.0584862
PWY-7199	9.03e-44	1.22e-42	0.617974	0.334664	0.0302977	0.440116	0.0467143	0.305991	0.0546703
PWY-7200	3.6e-34	2.85e-33	0.526523	0.39449	0.0177609	0.441074	0.0381819	0.367586	0.0269117
PWY-7211	9.62e-32	6.48e-31	0.500121	0.521428	0.0246714	0.363189	0.115549	0.509996	0.0407732
PWY-7323	2.62e-42	3.02e-41	0.605282	0.40806	0.0495317	0.186901	0.117847	0.370297	0.0438303
PWY-7371	2.49e-32	1.83e-31	0.50663	0.0462886	0.0193695	0.00459407	0.00937086	0.0295536	0.0193083
PWY0-1061	6.92e-32	4.74e-31	0.501719	0.497156	0.0505846	0.607052	0.0414721	0.511917	0.0515683
PWY0-1261	2.22e-43	2.81e-42	0.614617	0.487644	0.0247521	0.590707	0.0295632	0.493821	0.050863
PWY0-1296	3.38e-55	1.52e-53	0.704092	0.295015	0.0479155	0.547903	0.107831	0.302413	0.0587086
PWY0-1297	9.03e-60	7.3e-58	0.732849	0.268621	0.0449842	0.48273	0.0796323	0.276616	0.0482564
PWY0-1298	1.01e-61	4.06e-59	0.744264	0.227959	0.0416037	0.411761	0.0591709	0.23723	0.0454884
PWY0-1415	1.47e-38	1.45e-37	0.570767	0.237525	0.0328282	0.416086	0.091821	0.267102	0.0642561
PWY0-1586	4.46e-48	1.06e-46	0.653038	0.373426	0.0458671	0.618343	0.113732	0.417923	0.0547315
PWY0-845	7.54e-38	7.08e-37	0.563903	0.249089	0.0467424	0.411185	0.0566599	0.27218	0.0787913
REDCITCYC	4.03e-37	3.62e-36	0.556746	0.451241	0.0511326	0.202813	0.133805	0.390696	0.0775449
SER-GLYSYN-PWY	2.74e-34	2.22e-33	0.527764	0.558712	0.0325524	0.468549	0.0257743	0.54885	0.0503109
TYRFUMCAT-PWY	1.13e-44	1.62e-43	0.625616	0.139392	0.0240739	0.0329054	0.0383774	0.128339	0.0443491
VALSYN-PWY	1.36e-33	1.03e-32	0.52038	0.708865	0.0471322	0.571033	0.0326727	0.696715	0.0842861

## Sheet: S7. qPCR Primers  
Category	Full Target Name	Symbol	NCBI Accession	Primer Sequence	Reference
Reference Genes	Elongation Factor 1 ⍺ - paralog A	EF-1⍺	NM_001123629	F: GCAGTGGCAGTGTGATTTCG
				R: GTAGATCAGATGGCCGGTGG
	Hypoxanthin-guanine phosphoribosyl transferase	HPRT1	XM_014212854	F: CCGCCTCAAGAGCTACTGTAAT	Sahlmann et al., 2013
				R: GTCTGGAACCTCAAACCCTATG
	RNA polymerase subunit	RPABC2	XM_014193251	F: CCAATACATGACCAAATATGAAAGG
				R: ATGATGATGGGGATCTTCCTGC
Innate/Mucosal Genes	Alkaline Phosphatase	ALP	XM_014133547	F: CTAGTTTGGGTCGTGGTATGT	Skugor et al., 2008
				R: TGAGGGCATTCTTCAAAGTA
	Lysozyme	LYZ	NM_001146413	F: TGCTGGGTTTGTGTGTTTGAC
				R: CCATAGCGAGAGGCCATGTT
	Complement protein C3	C3	XM_014186867	F: TCAGGAAATGGTGAGGCGAC
				R: CGTCCTCGTGGCTTGTTTTG
	Mannose-binding protein C precursor	MBLc	NM_001141497	F: CCTGCAGGAGCTACTGGTATT
				R: GCAGGGGTTCCAGGTCTAAG
	Interleukin 1β	IL-1b	NM_001123582	F: ACAAGTGCTGGGTCCTGATG
				R: TAGGGCTACAGGTCTGGCTT
	Interleukin 10	IL-10	XM_014168417	F: TATAGAGGGCTTCCCCGTCAG
				R: GAATGCCTTCGTCCAACAGG
	Interleukin 17	IL17a	XM_014193546	F: TGGTTGTGTGCTGTGTGTCTATGC	Mutoloki et al. 2010
				R: TTTCCCTCTGATTCCTCTGTGGG
	Membrane Toll-like Receptor 5	mTLR5	* HQ664667	F: TTCAACTTCCTCACATACCTCCAA
				R: GTCAGGAGAGGCCAGGAATTG
Adaptive/Systemic Genes	Cluster differentiation 8⍺	CD8a	NM_001123583	F: CACTGTATGCCACTGCAACC
				R: CTGCCATTCTCGGCTGTCTT
	Cluster differentiation 4	CD4	NM_001146408	F: CGGACAAGGGCCAAGATGAT
				R: GCTGCCTGTGGTACAGTGAT
	Forkhead-box P3	FoxP3	NM_001198847	F: AGCTGGCACAGCAGGAGTAT	Zhang et al., 2011
				R: CGGGACAAGATCTGGGAGTA
	Immunoglobulin M	IgM	* Y12456 *Y12457	F: TGTAAAGAGAGCAGACTGGGACAG	Austbø et al., 2014
				R: GAGACGGGTGCTGCAGATATTC
	Immunoglobulin T	IgT	* GQ907004 * GQ907003	F: CTGACGGTGACTCTGAACCC
				R: GCTGTTCAGGTTGCCCTTTG
	Major histocompatibility complex 1	MHC1	XM_014177344	F: CCAACTGGAATGACCCCAACA	Tadiso et al., 2011
				R: CCAAATGACGACCCCAACAAC
	Major histocompatibility complex 2	MHC2	* EF451156	F: CTCACTGAGCCCATGGTGTAT
				R: GAGTCCTGCCAAGGCTAAGATG
